# Supplementary material for: Transforming delayed fluorescence into blue-shifted phosphorescence in aminoboranes via oxygen-to-sulfur substitution on the donor amine
Source: Royal Society of Chemistry journal article supplement (doi:10.1039/d4dt03200d), 2025-01-01
Supplement: d4dt03200d1.pdf [file d4dt03200d1.pdf]

## Transforming Delayed Fluorescence to Blue-shifted Phosphorescence in Aminoboranes via Oxygen-to-Sulfur Exchange on Donor Amine.

Akkarakaran Thayyil Muhammed Munthasir\*,<sup>a</sup> Satyam Jena,<sup>a</sup> and Pakkirisamy Thilagar\*<sup>a</sup>

[a] Department of Inorganic and Physical Chemistry, Indian Institute of Science, Bangalore-560012, India.

\* Email: thilagar@iisc.ac.in

### Table of Contents

|                                               |       |
|-----------------------------------------------|-------|
| 1. General experimental procedure             | 2     |
| 2. Synthesis details                          | 3-4   |
| 3. Structural characterization                | 5-10  |
| 4. Single crystal X-ray diffraction data      | 11-14 |
| 5. Photophysical and theoretical calculations | 14-56 |
| 6. References                                 | 56    |

# 1. General experimental procedures

## 1.1. Materials

The chemicals were purchased from commercial suppliers (Avra Scientific, India; Spectrochem, India; Merck, Germany) and used as received unless otherwise mentioned. The Standard Schlenk-line technique was used for reactions. THF was dried over sodium and distilled out under a nitrogen atmosphere.

## 1.2. Methods

$^1\text{H}$ ,  $^{11}\text{B}$ , and  $^{13}\text{C}$  NMR spectra were recorded at 25 °C on a Bruker Avance 400 MHz NMR Spectrometer operating at a frequency of 400 MHz for  $^1\text{H}$ , 128 MHz for  $^{11}\text{B}$ , and 100 MHz for  $^{13}\text{C}$ .  $^1\text{H}$  NMR spectra were referenced to TMS (0.00 ppm) as an internal standard. Chemical shift multiplicities are reported as singlet (s), doublet (d), triplet (t), quartet (q), and multiplet (m).  $^{13}\text{C}$  resonances were referenced to the  $\text{CDCl}_3$  signal at  $\sim 77.67$  ppm.  $^{11}\text{B}$  NMR chemical shift values were referenced to the external standard boron signal of  $\text{BF}_3 \cdot \text{Et}_2\text{O}$ . Electronic absorption spectra, fluorescence emission spectra, and time-resolved fluorescence (TRF) decay measurements were recorded on a SHIMADAZU UV-2600 spectrophotometer and FLS-980 EDINBURGH spectrometer, respectively. Time-gated emission spectra were recorded using the same FLS 980 fluorimeters by excitation source of a pulsed microsecond flash lamp ( $\mu\text{F}1$ ) with a pulse width of 1.1  $\mu\text{s}$ . Temperature-dependent emission studies were also performed using the same instrument with the help of an OXFORD cryostat. Solutions of all the compounds for spectral measurements were prepared using anhydrous spectrophotometric grade solvents and standard volumetric glassware. Quartz cuvettes with sealing screw caps were used for the solution state spectral measurements. Single crystal X-ray diffraction studies were carried out with a Bruker SMART APEX diffractometer at 90 K equipped with a 4-axis goniometer for all the compounds. The structures were solved by direct methods and refined by full-matrix least-squares on F2 using SHELXTL software. Density functional theory (DFT) calculations were done using B3LYP functional with 6-31G(d) basis sets as incorporated in the Gaussian 09 package for all the atoms.<sup>[1,2]</sup> The optimized structures and the frontier molecular orbitals (FMOs) were viewed using Gaussview 5.0. SOC calculations were done by ORCA 5.0 software, using B3LYP functional with B3LYP/G cc-pvdz basis sets and functional. All the ground state theoretical calculations are performed by using coordinates taken from the crystal structure after single-point energy calculation. Output coordinates from this calculation are further taken for excited state calculations.

## 2. Synthesis

## 2.1 Synthesis of BNO and BNS

### General procedure

**BNO** and **BNS** are synthesized according to the reported literature procedure.<sup>3</sup> A hexane solution of n-BuLi (1.6 M, 1.1eq) was added dropwise to anhydrous THF solution of 10*H*-phenothiazine or 10*H*-phenoxazine (1 eq) at around -78 °C under continuous stirring. A solution of bis(2,6-dimethylphenyl)fluoroborane (1.2 eq) in anhydrous THF was added to the reaction mixture after 1.5 h at -78 °C. The reaction mixture was allowed to warm to room temperature, and the stirring was continued for another 12 h. After the completion of the reaction, volatile organic solvents were removed under reduced pressure. The resultant residue was dissolved in dichloromethane and washed with water (3x100 mL). DCM layer was dried over Na<sub>2</sub>SO<sub>4</sub> and the removal of organic volatiles under reduced pressure afforded crude product. Analytically pure compound was obtained by column chromatography over silica gel and further recrystallization from Hexane: DCM mixture (1:3) (for **BNO**) or DCM (for **BNS**) by slow evaporation.

### Synthesis of 10-(bis(2,6-dimethylphenyl)boraneyl)-10*H*-phenoxazine (**BNO**)<sup>3,a</sup>

Compound **BNO** was synthesized following the general procedure depicted above **BNS**. The reagents involved, the quantity used, and the characterization data are as follows. Hexane solution of n-BuLi (1.6 M, 8.2 ml), 10*H*-phenoxazine (2.0 g, 10.92 mmol) and bis(2,6-dimethylphenyl)fluoroborane (2.9 g, 12.0 mmol) in anhydrous THF. The analytically pure product was obtained after silica gel column chromatography using DCM: hexane (v/v=1/9) as eluent and recrystallization from Hexane: DCM mixture in the 1:3 ratio. Pale yellow crystals (**BNO**), Yield: 2.9 g (65 %), <sup>1</sup>H NMR (400 MHz, CDCl<sub>3</sub>, 25 °C) δ (ppm) 7.08 (t, *J* = 8.0 Hz, 2H), 7.01 (dd, *J* = 8.0 Hz, 4.0 Hz 2H), 6.97 (t,d *J* = 8.0 Hz, 4.0 Hz 2H), 6.87 (t, *J* = 8.0 Hz, 6H), 6.6 (t, *J* = 8.0 Hz, 2H), 2.31 (s, 12H). <sup>11</sup>B NMR (160 MHz, CDCl<sub>3</sub>, 25 °C) δ (ppm): 50.7. <sup>13</sup>C NMR (125 MHz, CDCl<sub>3</sub>, 25 °C) δ (ppm) 149.7, 141.8, 140.9, 133.7, 128.3, 127.2, 125.3, 123.1, 122.6, 116.4, 22.5. HRMS (m/z)- C<sub>28</sub>H<sub>26</sub>BNOH - calculated: 404.2185 (M+H), found:404.2183.

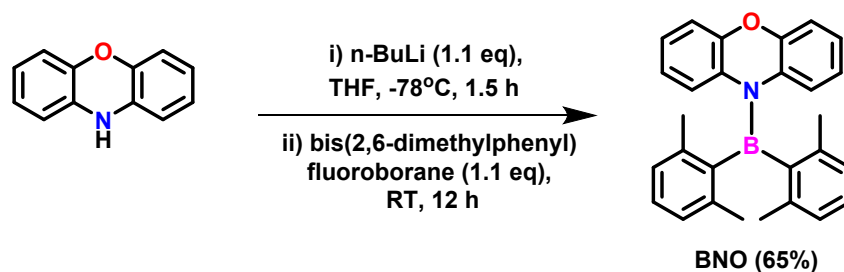

Scheme S1. Synthesis of **BNO**.

### Synthesis of 10-(bis(2,6-dimethylphenyl)boraneryl)-10H-phenothiazine (**BNS**)<sup>3.b</sup>

Compound **BNS** was synthesized following the general procedure depicted above. The reagents involved, the quantity used, and the characterization data are as follows. Hexane solution of n-BuLi (1.6 M, 7.53 ml), 10H-phenothiazine (2g, 10.04 mmol) and bis(2,6-dimethylphenyl)fluoroborane (2.65 g 11.04 mmol) in anhydrous THF. The analytical pure product is obtained by silica column chromatography using hexane as eluent and recrystallization from the DCM solution. The product 10-(bis(2,6-dimethylphenyl)boraneryl)-10H-phenothiazine obtained as colourless crystals. Yield: 3.45 g (82 %). <sup>1</sup>H NMR (400 MHz, CDCl<sub>3</sub>, 25 °C): δ (ppm) 7.26-7.29 (d, *J* = 8 Hz, 2H), 7.15-7.18 (d *J* = 8.0 Hz, 2H), 7.02-7.05 (m, 2H) 6.98-7.01 (m, 2H), 6.84-6.90 (m, 6H), 2.45 (s, 12H). <sup>11</sup>B NMR (160 MHz, CDCl<sub>3</sub>, 25 °C) δ (ppm): 50.20. <sup>13</sup>C NMR (125 MHz, CDCl<sub>3</sub>, 25 °C) δ (ppm) 143.1, 141.4, 140.6, 129.8,127.7,127.1, 127.0,126.3, 125.3,125.2,24.2. HRMS (m/z)- C<sub>28</sub>H<sub>26</sub>BNS- calculated: 419.1875 (M+), found: 419.1880

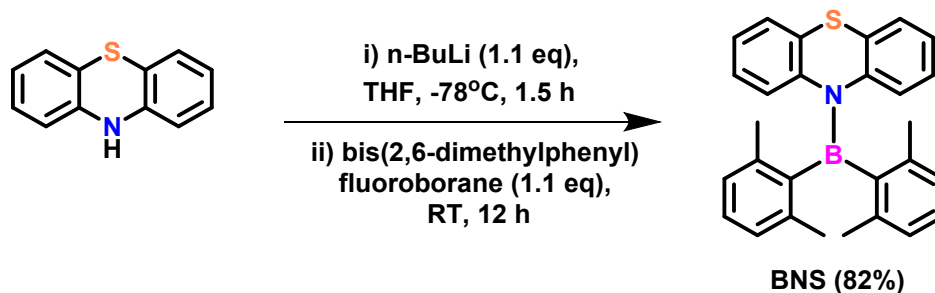

**Scheme S2.** Synthesis of **BNS**.



### 3. Structural charecterization

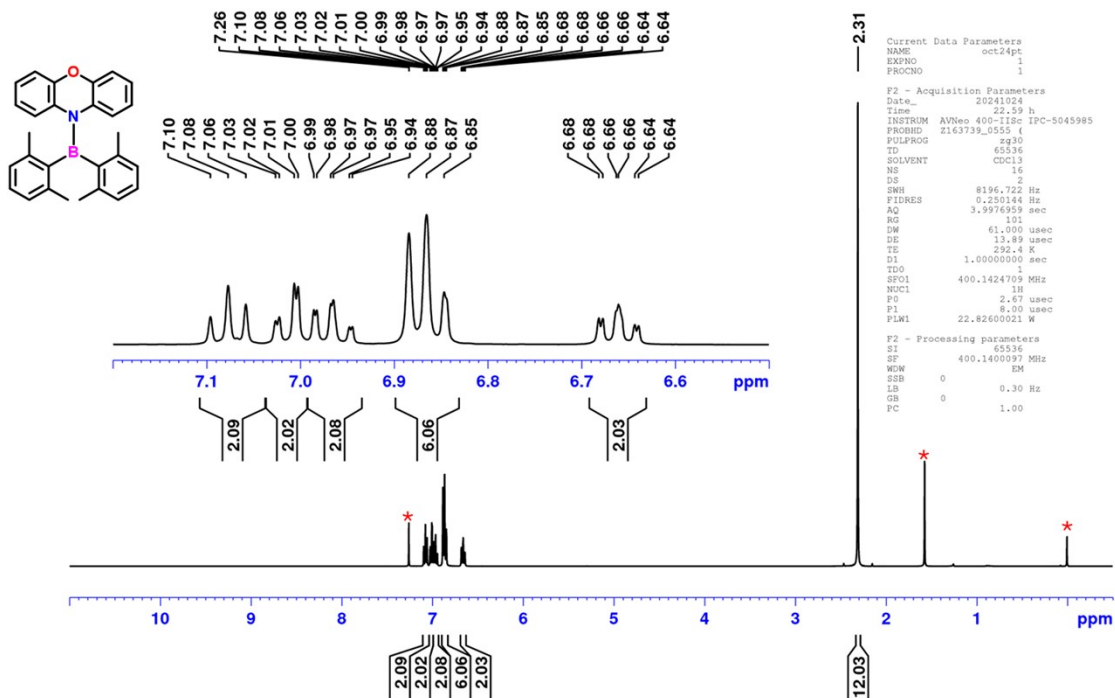

Figure S1. <sup>1</sup>H NMR spectrum of BNO in CDCl<sub>3</sub> at 25°C. [Peaks marked with an asterisk are residual solvent peaks CDCl<sub>3</sub> (δppm = 7.26), H<sub>2</sub>O (δppm= 1.55) and TMSCl (δppm= 0.00)]

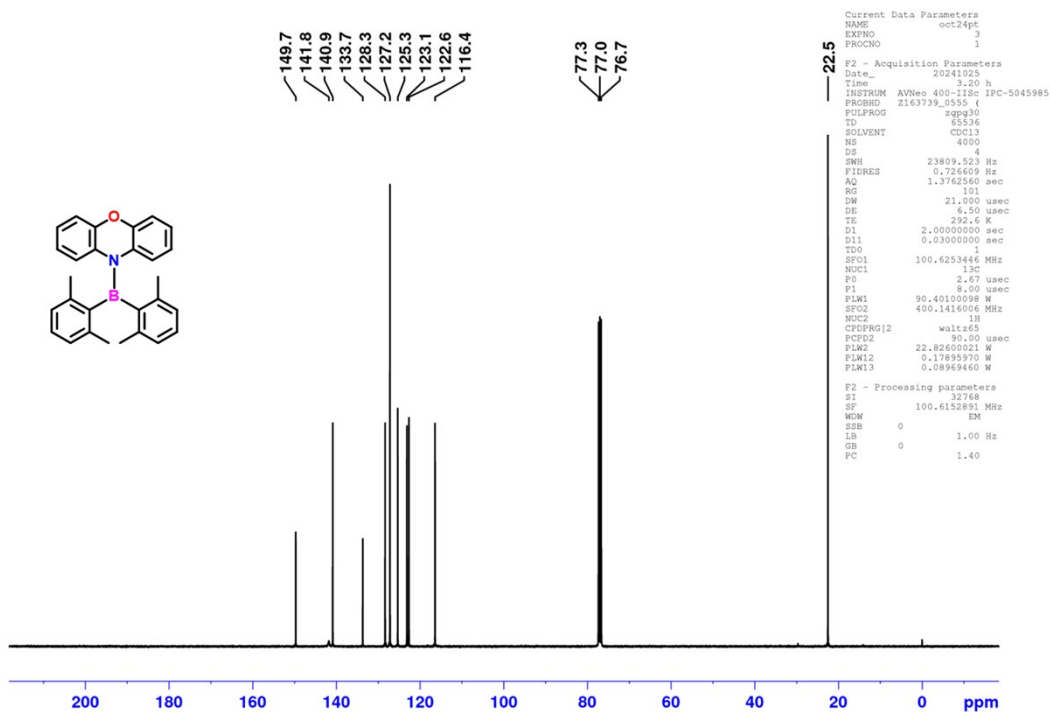

Figure S2. <sup>13</sup>C NMR spectrum of BNO in CDCl<sub>3</sub> at 25°C.

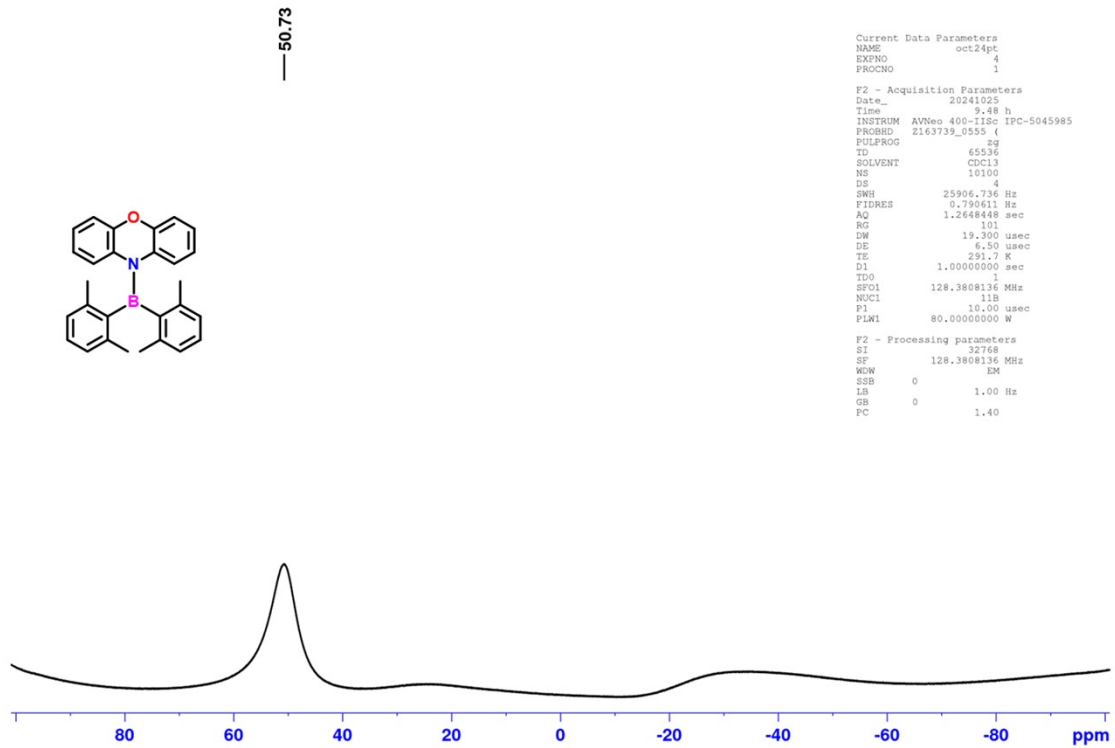

**Figure S3.**  $^{11}\text{B}$  NMR spectrum of **BNO** in  $\text{CDCl}_3$  at  $25^\circ\text{C}$ .

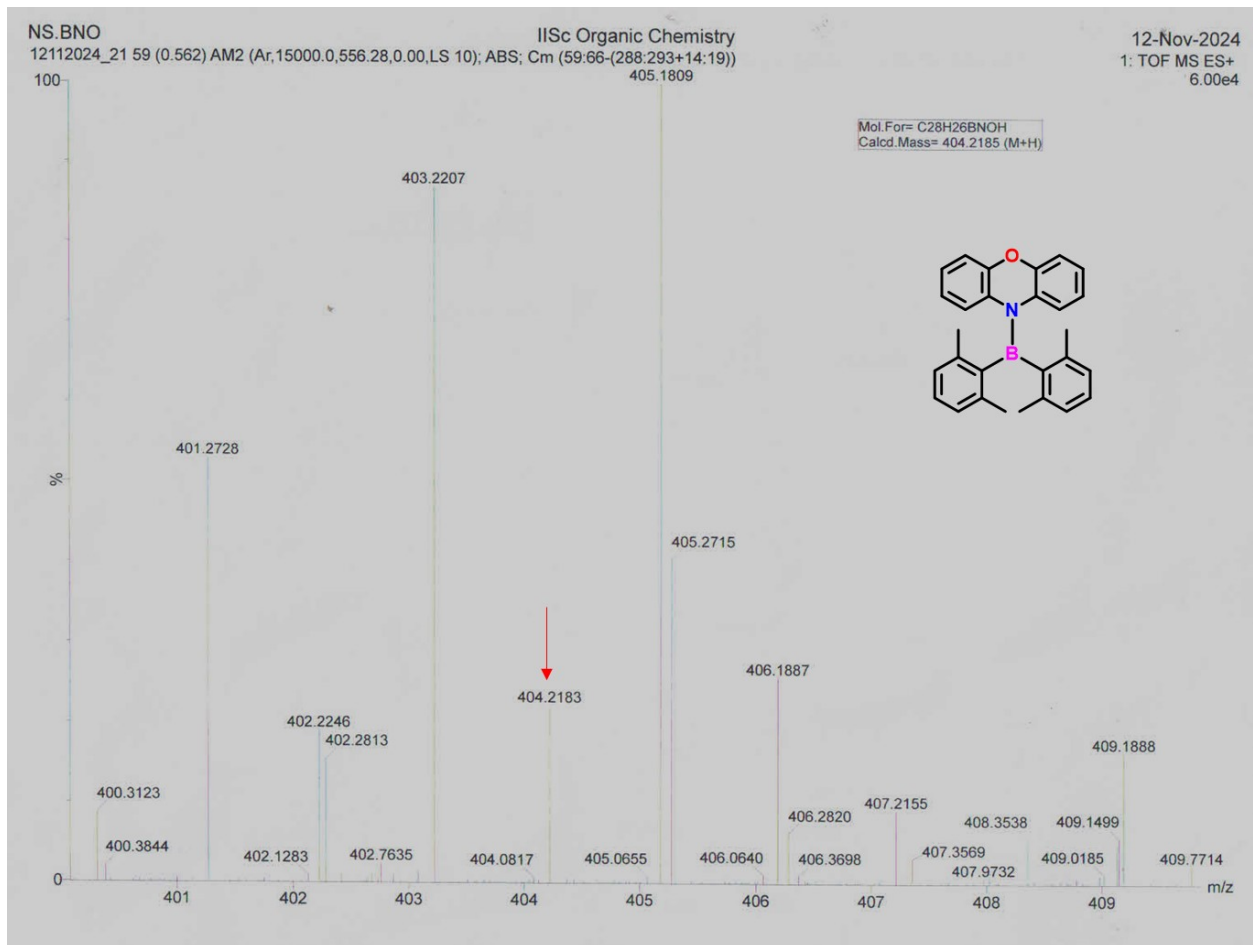

Figure S4. High-resolution mass (HRMS) spectrum of BNO.

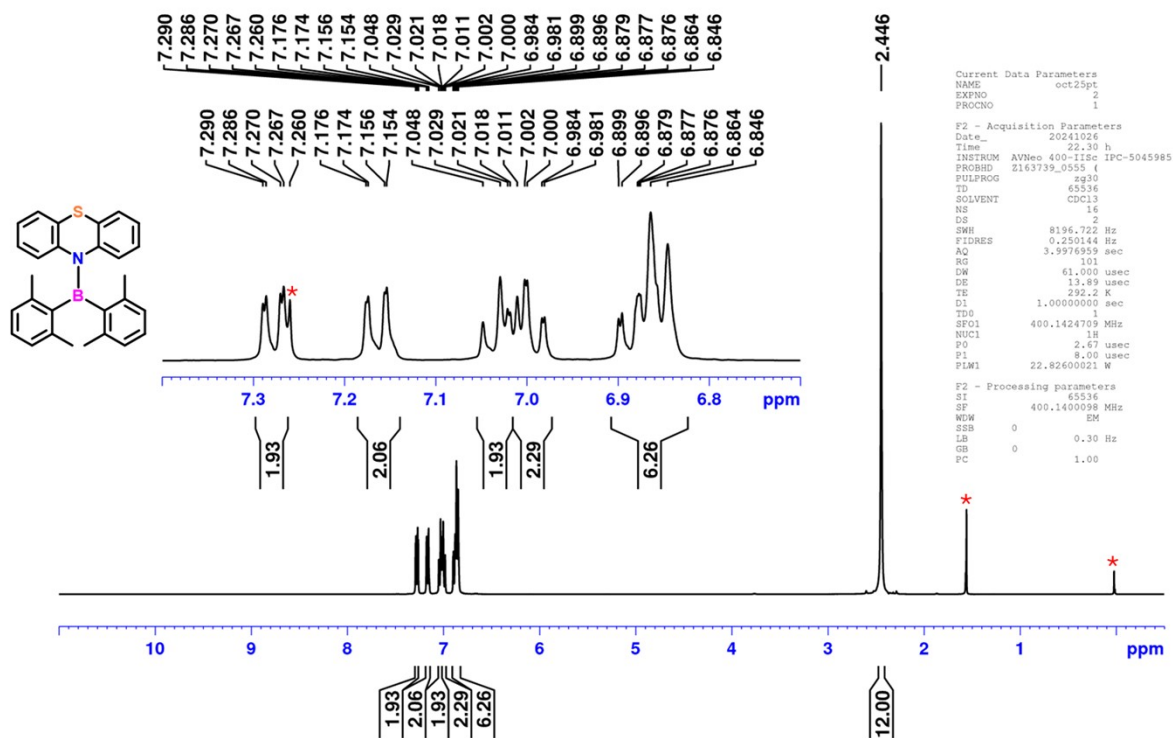

**Figure S5.** <sup>1</sup>H NMR spectrum of BNS in CDCl<sub>3</sub> at 25°C. [Peaks marked with an asterisk are residual solvent peaks CDCl<sub>3</sub> (δppm = 7.26), H<sub>2</sub>O (δppm= 1.55) and TMSCl (δppm= 0.00)]

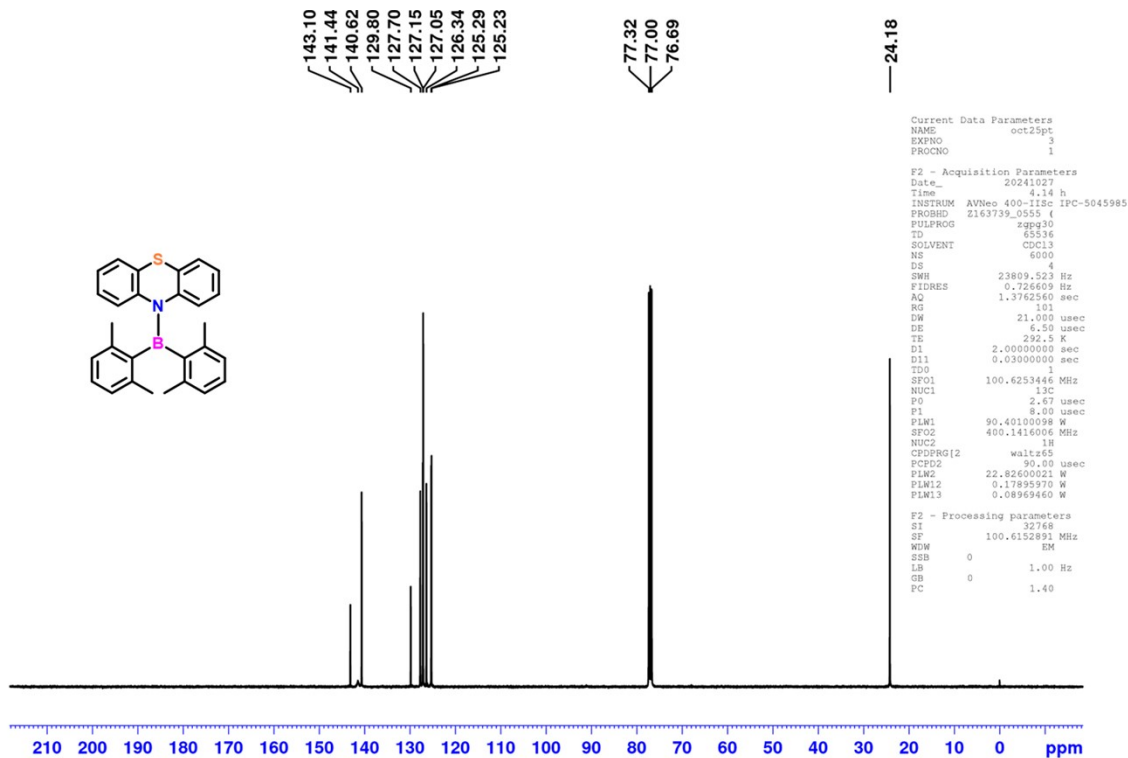

**Figure S6.** <sup>13</sup>C NMR spectrum of BNS in CDCl<sub>3</sub>.at 25°C.

—50.20

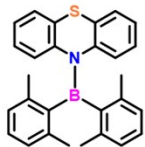

```
Current Data Parameters
NAME      oct25pt
EXPNO     4
PROCNO    1

F2 - Acquisition Parameters
Date_     20241027
Time      9.32 h
INSTRUM   AVNco 400-IISc IPC-5045985
PROBHD    Z163739_0555 (
PULPROG   zg
ID         65536
SOLVENT   CDCl3
NS         8280
DS         4
SWH        25906.736 Hz
FIDRES     0.790611 Hz
AQ         1.2648448 sec
RG         101
DW         19.300 usec
DE         6.50 usec
TE         291.6 K
D1         1.00000000 sec
TDO        1
SFO1       128.3808136 MHz
NUC1       11B
P1         10.00 usec
PL1        80.00000000 W

F2 - Processing parameters
SI         32768
SF         128.3808136 MHz
WDW        EM
SSB        0
LB         1.00 Hz
GB         0
PC         1.40
```

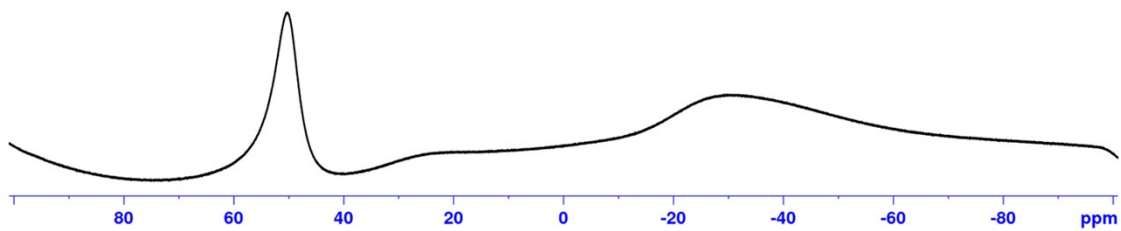

**Figure S7.** <sup>11</sup>B NMR spectrum of BNS in CDCl<sub>3</sub> at 25°C.

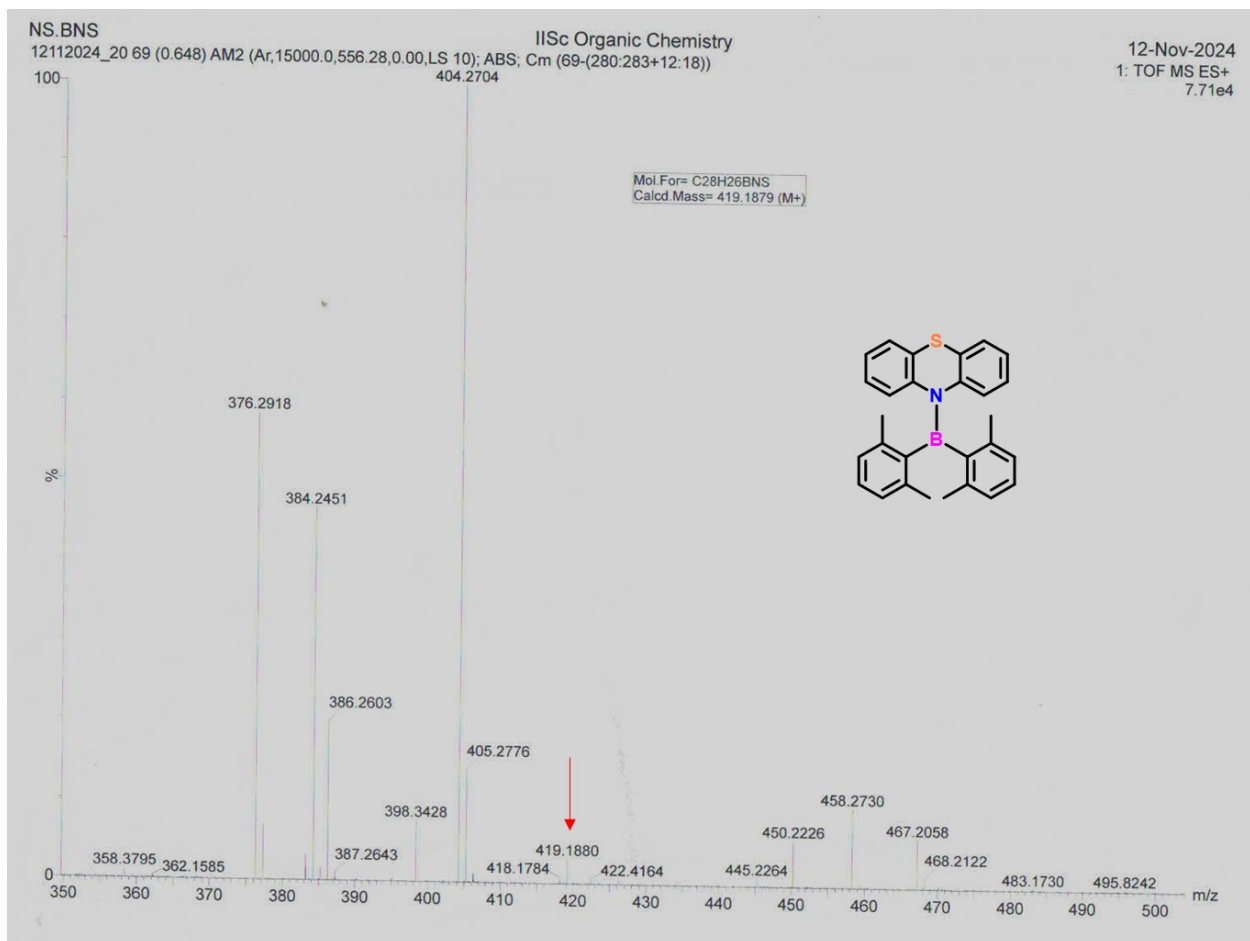

**Figure S8.** High-resolution mass (HRMS) spectrum of **BNS**

## 4. Crystal data.

**Table S1:** Crystallographic data and refinement parameters for **BNO**.

|                                         |                                       |
|-----------------------------------------|---------------------------------------|
| Compound                                | <b>BNO</b>                            |
| Empirical formula                       | C <sub>28</sub> H <sub>26</sub> B N O |
| FW                                      | 403.31                                |
| T (K)                                   | 100(2) K                              |
| Crystal system                          | Triclinic                             |
| Space group                             | <i>P</i> -1                           |
| a/Å                                     | 9.6034(2)                             |
| b/Å                                     | 10.4382(3)                            |
| c/Å                                     | 12.1561(3)                            |
| α/deg                                   | 101.682(1)                            |
| β/deg                                   | 103.810(1)                            |
| γ/deg                                   | 104.221(1)                            |
| V/Å <sup>3</sup>                        | 1102.05(5)                            |
| Z                                       | 2                                     |
| ρ <sub>calcd</sub> (gcm <sup>-3</sup> ) | 1.215                                 |
| μ (Mo Kα) (mm <sup>-1</sup> )           | 0.069                                 |
| λ/Å                                     | 0.71073                               |
| F (000)                                 | 428                                   |
| Collected reflections                   | 6646                                  |
| Unique reflections                      | 5131                                  |
| GOF (F2)                                | 1.066                                 |
| R1 [I>2σ(I)] <sup>[a]</sup>             | 0.0563                                |
| wR2 [I>2σ(I)] <sup>[b]</sup>            | 0.1897                                |
| CCDC Number                             | 2402292                               |

<sup>[a]</sup>  $R1 = \frac{\sum ||F_o| - |F_c||}{\sum |F_o|}$ . <sup>[b]</sup>  $wR2 = \frac{[\sum\{w(F_o^2 - F_c^2)^2\}]}{\sum\{w(F_o^2)\}}$

**Table S2:** The selected bond lengths and dihedral angles between different aromatic rings were measured from crystal structures of **BNO** and **BNS**.<sup>3,b</sup>

| Compound   | B-N bond length (Å) | Dihedral angle (deg) | The angle between the xylyl plane(deg) | The angle between the phenyl plane in phenoxazine/phenothiazine (deg) |
|------------|---------------------|----------------------|----------------------------------------|-----------------------------------------------------------------------|
| <b>BNO</b> | 1.433               | 28.70                | 86.80                                  | 146.35                                                                |
| <b>BNS</b> | 1.445               | 22.31                | 82.73                                  | 134.08                                                                |

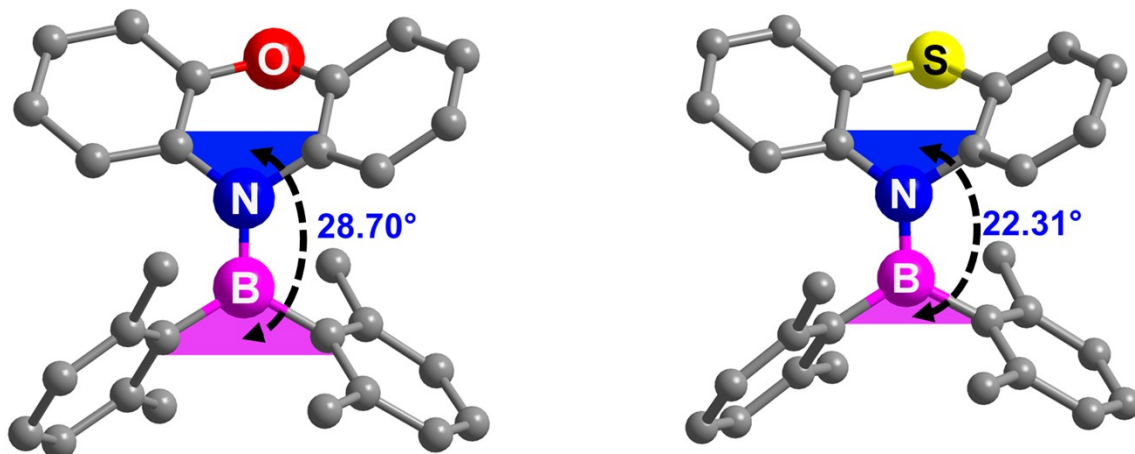

**Figure S9.** Dihedral angle (deg) between the plane containing a nitrogen atom and carbon directly attached to it (CNC) in phenoxazine/phenothiazine (blue) and the plane containing a boron atom and carbon atoms directly attached to it (CBC) in bisarylborane (magenta). The angles between the planes were calculated from crystal structures using mercury software.

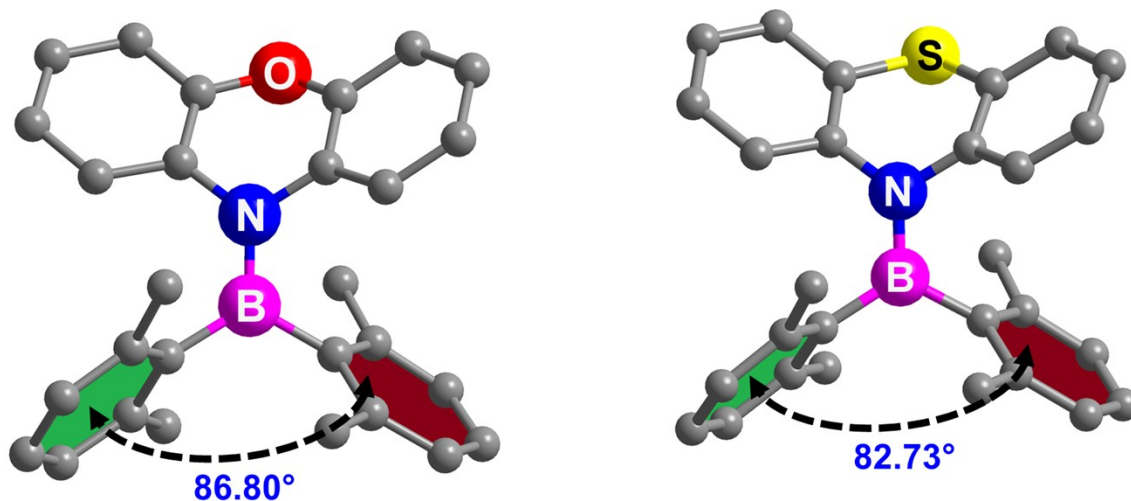

**Figure S10.** Angle (deg) between two aryl planes attached to the boron in **BNO** and **BNS**. The angles between the planes were calculated from crystal structures using mercury software.



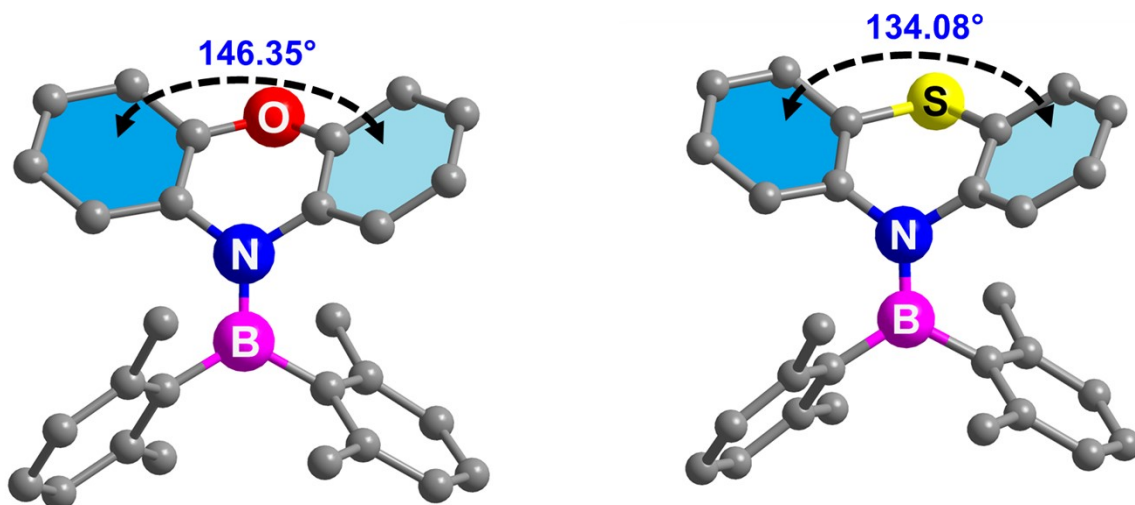

**Figure S11.** Puckering angle ( $^{\circ}$ ) in (a) phenoxazine of **BNO** and (b) phenothiazine of **BNS**. The angles between the planes were calculated from crystal structures using mercury software.

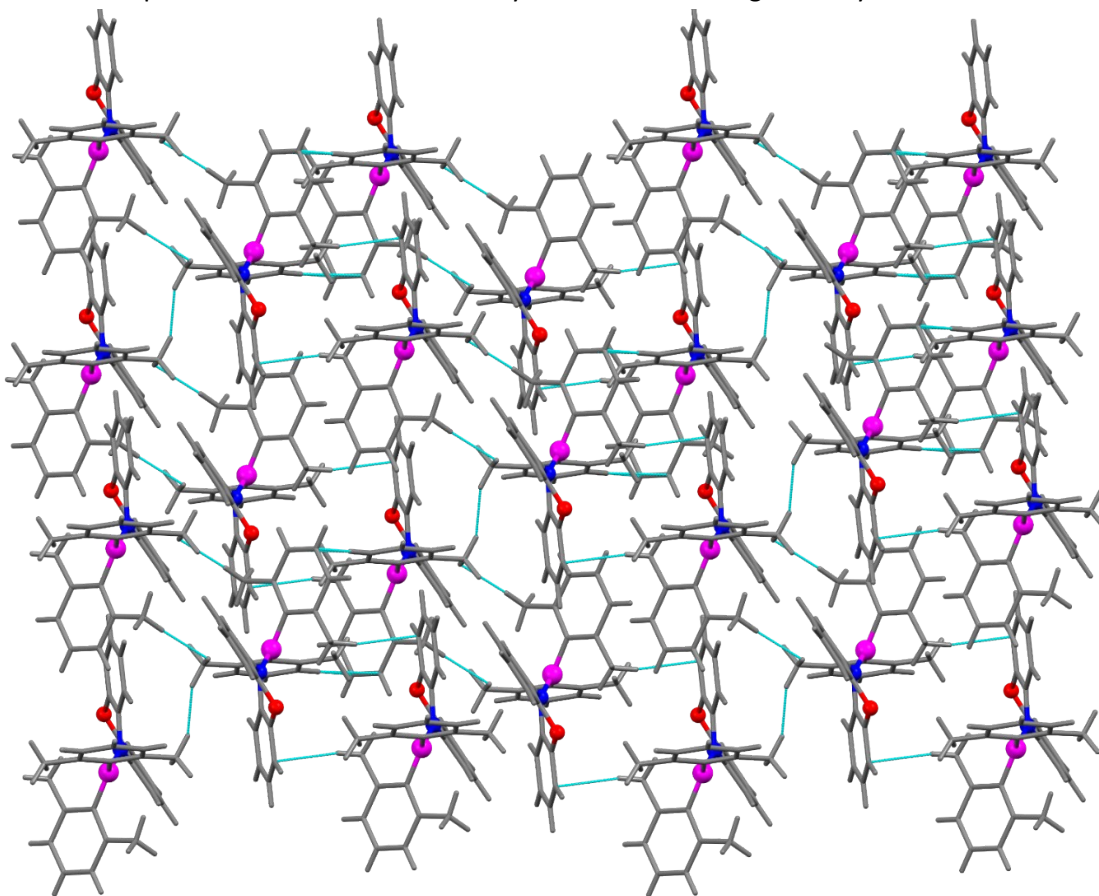

**Figure S12:** 3D supramolecular structure of **BNO** [cyan dashed line represents the CH $\cdots$  $\pi$  interactions (2.849Å and 3.31Å), atom color code: carbon: grey, nitrogen: blue, oxygen: red and hydrogen off white]

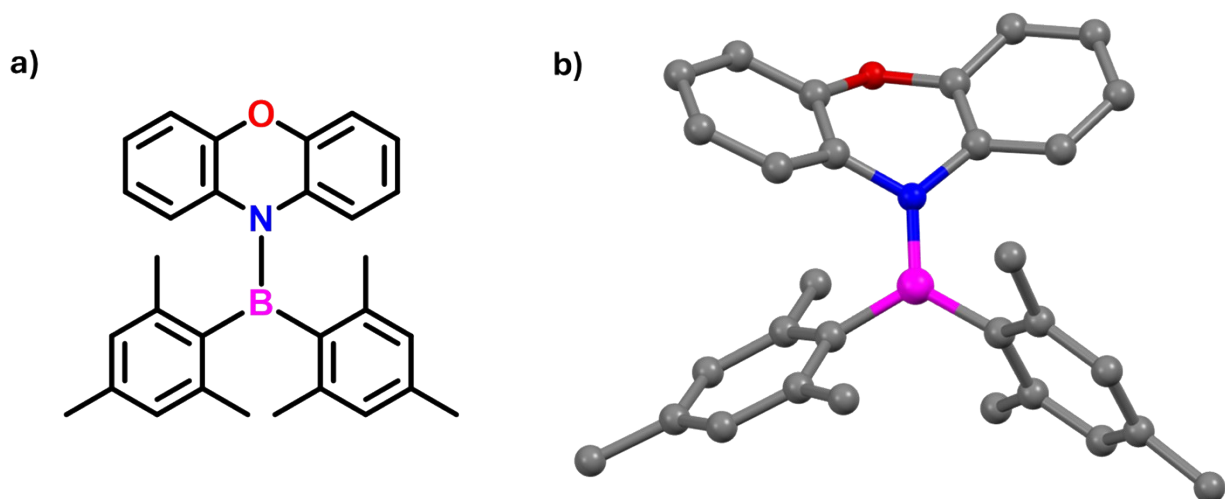

Figure S13. (a) Chemical and (b) molecular structure of  $R1^{3.a}$ .

## 5. Photophysical and Theoretical Data

### 5.1 Solution-state photoluminescence

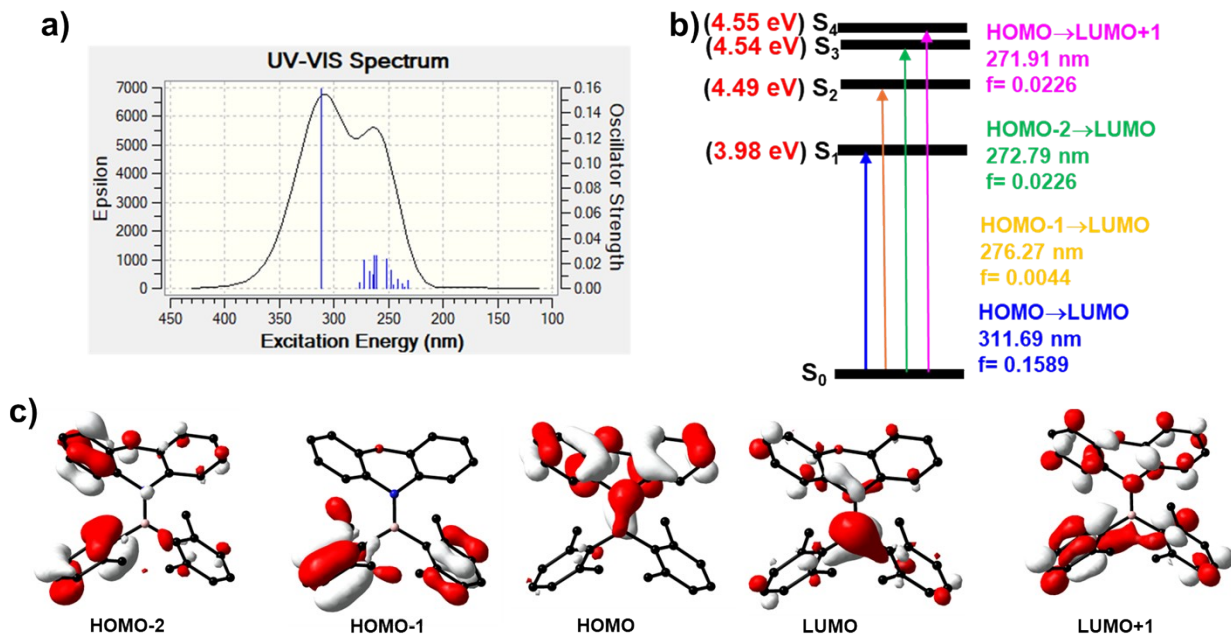

Figure S14. (a) Simulated UV-visible absorption spectra and (b) corresponding singlet vertical transition computed from TD-DFT calculations. (c) Molecular orbitals involved in the transitions are obtained from optimized ground state geometries of **BNO** using DFT at B3LYP and 6-31G (d) level of theory.

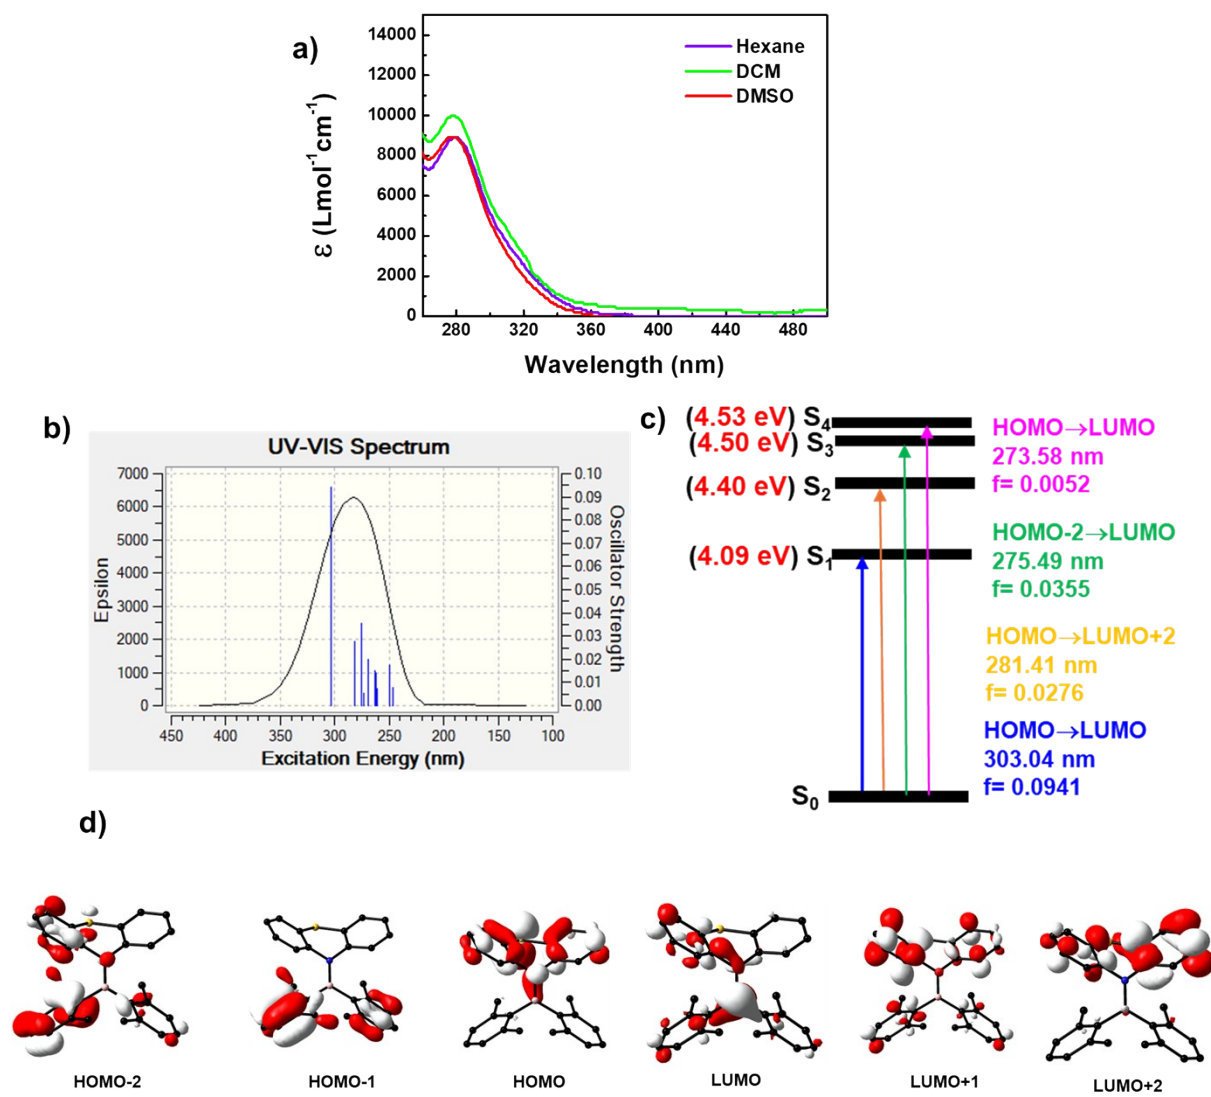

**Figure S15.** (a) UV-visible absorption spectra of BNS in different solvents (conc.  $10^{-5}$  M). (b) Simulated UV-visible absorption spectra and (c) corresponding singlet vertical transition computed from TD-DFT calculations. (d) Molecular orbitals involved in the transitions are obtained from optimized ground state geometries of BNO using DFT at B3LYP and 6-31G-(d) level of theory.

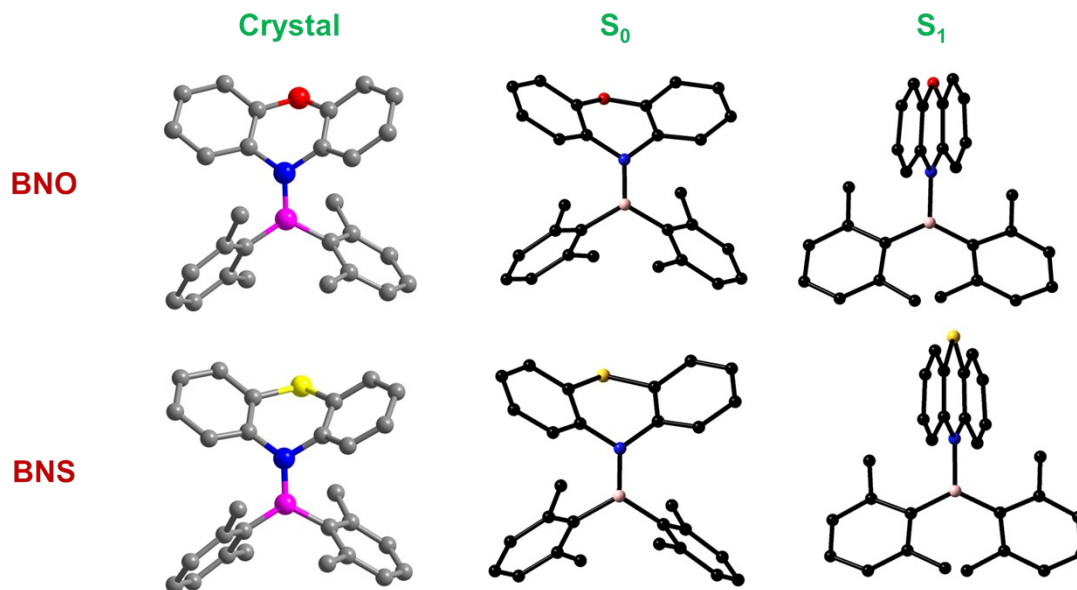

**Figure S16.** Molecular structure and ground state ( $S_0$ ) and first singlet excited state optimized geometry ( $S_1$ ) for **BNO** and **BNS**. Computation details: DFT/TD-DFT at B3LYP and 6-31G (d) level of theory.

**Table S3.** The selected bond parameters for **BNS** and **BNO** were obtained from the crystal structure and  $S_0$  and  $S_1$  optimized geometry. Computation details: DFT/TD-DFT at B3LYP and 6-31G (d) level of theory.

| Compound                                                   | B-N bond length (Å) | BC bond length (Å) | Dihedral angle ( $\Theta_{BN}$ ) (deg) | The angle between the xylyl plane ( $\Theta_{xy}$ ) (°) | The angle between the phenyl plane in phenoxazine/phenothiazine ( $\Theta_{xy}$ ) (°) |
|------------------------------------------------------------|---------------------|--------------------|----------------------------------------|---------------------------------------------------------|---------------------------------------------------------------------------------------|
| <b>Crystal</b>                                             |                     |                    |                                        |                                                         |                                                                                       |
| <b>BNO</b>                                                 | 1.433               | 1.590<br>1.583     | 28.70                                  | 86.80                                                   | 146.35                                                                                |
| <b>BNS</b>                                                 | 1.445               | 1.603<br>1.591     | 22.31                                  | 82.73                                                   | 134.08                                                                                |
| <b>Ground state-optimized geometry (<math>S_0</math>)</b>  |                     |                    |                                        |                                                         |                                                                                       |
| <b>BNO</b>                                                 | 1.434               | 1.594<br>1.600     | 23.92                                  | 84.59                                                   | 146.59                                                                                |
| <b>BNS</b>                                                 | 1.446               | 1.608<br>1.608     | 18.96                                  | 81.51                                                   | 135.86                                                                                |
| <b>Excited state-optimized geometry (<math>S_1</math>)</b> |                     |                    |                                        |                                                         |                                                                                       |
| <b>BNO</b>                                                 | 1.619               | 1.552<br>1.552     | 69.42                                  | 72.01                                                   | 174.51                                                                                |
| <b>BNS</b>                                                 | 1.630               | 1.554<br>1.554     | 68.94                                  | 70.15                                                   | 172.92                                                                                |

**Table S4.** Summary of TD-DFT computed singlet vertical transitions involved in **BNO**.

| Transitions           | E/eV   | $\lambda$ /nm | $f$    | Dominant transitions (%)                                                 |
|-----------------------|--------|---------------|--------|--------------------------------------------------------------------------|
| $S_0 \rightarrow S_1$ | 3.9778 | 311.69        | 0.1589 | HOMO $\rightarrow$ LUMO (48.70)                                          |
| $S_0 \rightarrow S_2$ | 4.4877 | 276.27        | 0.0044 | HOMO-1 $\rightarrow$ LUMO (45.46)                                        |
| $S_0 \rightarrow S_3$ | 4.5450 | 272.79        | 0.0226 | HOMO-2 $\rightarrow$ LUMO (41.40)                                        |
| $S_0 \rightarrow S_4$ | 4.5597 | 271.91        | 0.0055 | HOMO $\rightarrow$ LUMO +1 (21.28)<br>HOMO $\rightarrow$ LUMO +2 (24.20) |
| $S_0 \rightarrow S_5$ | 4.6432 | 267.02        | 0.0138 | HOMO $\rightarrow$ LUMO+1 (21.53)                                        |
| $S_0 \rightarrow S_6$ | 4.7101 | 263.23        | 0.0263 | HOMO-4 $\rightarrow$ LUMO (27.52)<br>HOMO-3 $\rightarrow$ LUMO (8.23)    |
| $S_0 \rightarrow S_7$ | 4.7515 | 260.94        | 0.0259 | HOMO $\rightarrow$ LUMO+3 (34.57)<br>HOMO-5 $\rightarrow$ LUMO+2 (1.60)  |

**Table S5.** Summary of TD-DFT computed singlet vertical transitions involved in **BNS**.

| Transitions           | E/eV   | $\lambda$ /nm | $f$    | Dominant transitions (%)                                               |
|-----------------------|--------|---------------|--------|------------------------------------------------------------------------|
| $S_0 \rightarrow S_1$ | 4.0913 | 303.04        | 0.0941 | HOMO $\rightarrow$ LUMO (47.76)                                        |
| $S_0 \rightarrow S_2$ | 4.4058 | 281.41        | 0.0276 | HOMO $\rightarrow$ LUMO+2 (34.79)<br>HOMO $\rightarrow$ LUMO+1 (12.15) |
| $S_0 \rightarrow S_3$ | 4.5006 | 275.49        | 0.0355 | HOMO $\rightarrow$ LUMO+1 (17.44)<br>HOMO-2 $\rightarrow$ LUMO (17.45) |
| $S_0 \rightarrow S_4$ | 4.5320 | 273.58        | 0.0052 | HOMO $\rightarrow$ LUMO (44.81)                                        |
| $S_0 \rightarrow S_5$ | 4.6008 | 269.49        | 0.0200 | HOMO-2 $\rightarrow$ LUMO (25.76)                                      |
| $S_0 \rightarrow S_6$ | 4.7115 | 263.15        | 0.0152 | HOMO $\rightarrow$ LUMO+3 (36.5)                                       |
| $S_0 \rightarrow S_7$ | 4.7248 | 262.41        | 0.0140 | HOMO-4 $\rightarrow$ LUMO (40.45)                                      |

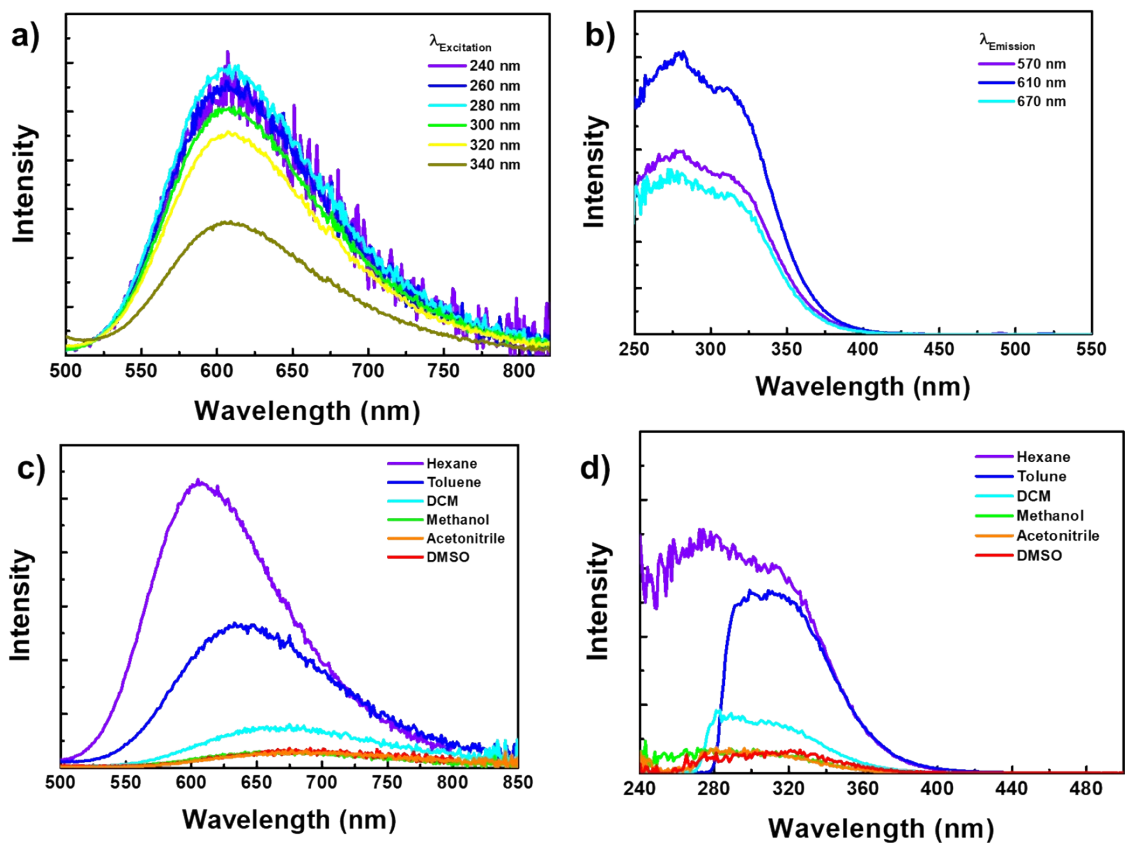

**Figure S17.** (a) Excitations-dependent photoluminescence [PL] and (b) emission-dependent excitation spectra for **BNO** in hexane (conc.  $10^{-5}$  M). (c) Steady-state PL spectra and (d) corresponding excitation spectra for **BNO** in different solvents (conc.  $10^{-5}$  M) at  $\lambda_{\text{ex}} = 310$  nm.

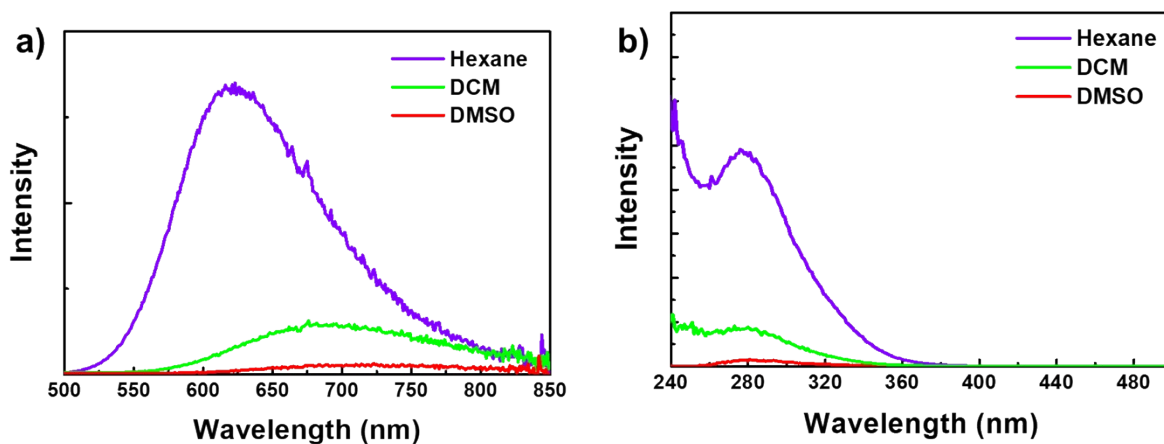

**Figure S18.** (a) steady-state PL spectra (b) corresponding excitation spectra for **BNS** in different solvents (conc.  $10^{-5}$  M) at  $\lambda_{\text{ex}} = 310$  nm.

**Table S6.** Selected photophysical data for **BNO** and **BNS** in different solvents (conc.  $10^{-5}$  M) .(nd: Not detectable)

|            | Solvent      | $\lambda_{\text{abs}}$ [nm]<br>( $\epsilon$ ) [ $\text{mol}^{-1} \text{L cm}^{-1}$ ] | $\lambda_{\text{em}}$<br>[nm] | PL lifetime [ns]                                             | PLQY [%] |
|------------|--------------|--------------------------------------------------------------------------------------|-------------------------------|--------------------------------------------------------------|----------|
|            |              |                                                                                      |                               | $\lambda_{\text{ex}} = 300 \text{ nm}$<br>$\tau_1$ ( $A_1$ ) |          |
| <b>BNO</b> | Hexane       | 282 (7245)<br>315 (5581)                                                             | 605                           | 11.78 (100)                                                  | 8.0 %    |
|            | Toluene      | 282 (-)<br>315 (5581)                                                                | 635                           | nd                                                           | nd       |
|            | DCM          | 281 (10433)<br>312 (7940))                                                           | 665                           | nd                                                           | nd       |
|            | Methanol     | 282 (5636)<br>314 (4389)                                                             | 668                           | nd                                                           | nd       |
|            | Acetonitrile | 281 (6476)<br>310 (5029)                                                             | 687                           | nd                                                           | nd       |
|            | DMSO         | 282 (7245)<br>315 (5581)                                                             | 687                           | nd                                                           | nd       |
| <b>BNS</b> | Hexane       | 278 nm (8904)                                                                        | 620                           | 11.18 (100)                                                  | nd       |
|            | DCM          | 278 nm (10025)                                                                       | 680                           | nd                                                           | nd       |
|            | DMSO         | 278 nm (8905)                                                                        | 685                           | nd                                                           | nd       |

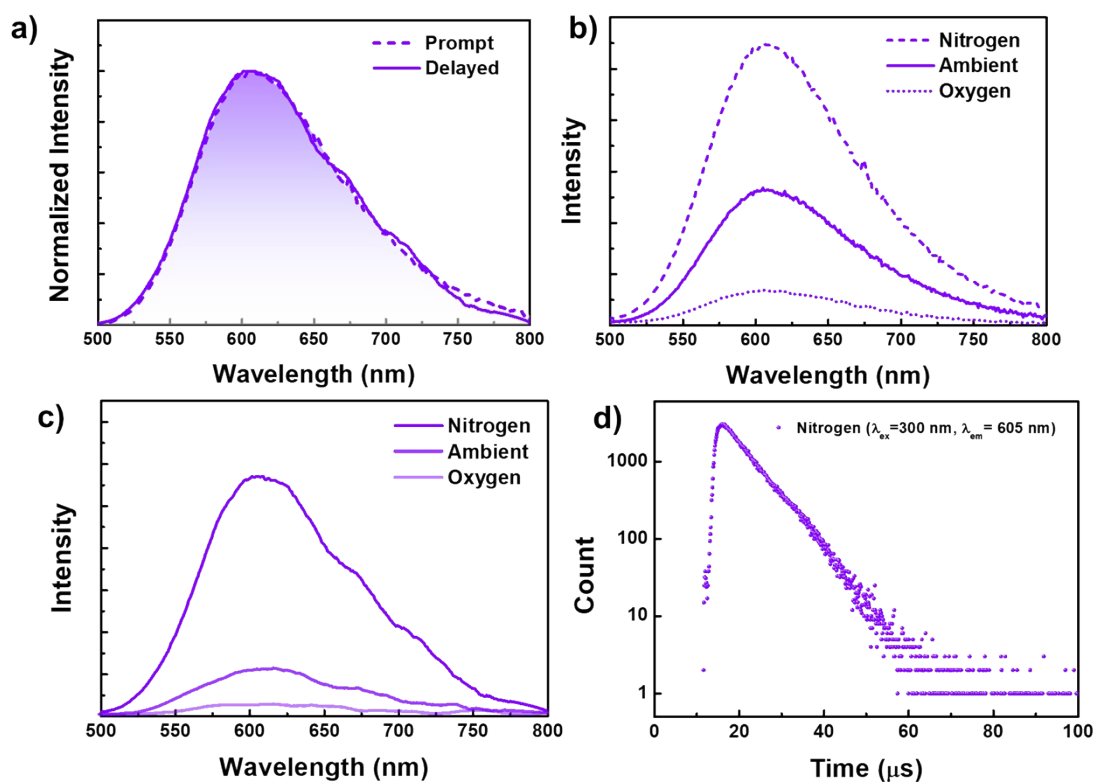

**Figure S19.** (a) Prompt and time-gated/delayed [10 $\mu$ s delay] PL spectra ( $\lambda_{\text{ex}} = 310$  nm) for **BNO** in hexane purged with nitrogen gas. (b) Steady-state PL spectra and (c) time-gated/delayed [20 $\mu$ s delay] PL spectra ( $\lambda_{\text{ex}} = 310$  nm) for **BNO** in hexane under different environments. (d) delayed fluorescence decay fit for **BNO** in hexane, purged with nitrogen gas ( $\lambda_{\text{ex}} = 310$  nm,  $\lambda_{\text{em}} = 605$  nm, and conc.  $10^{-5}$  M).

**Table S7.** Fluorescence (FI), delayed fluorescence (DF) lifetime, and total photoluminescence quantum yield for **BNO** in Hexane (conc.  $10^{-5}$  M) under different environments (nd : Not detectable).

| Atmosphere   |    | $\lambda_{\text{ex}}$ (nm) | $\lambda_{\text{em}}$ (nm) | $\tau_1 (A_1)$     | PLQY |
|--------------|----|----------------------------|----------------------------|--------------------|------|
| $\text{N}_2$ | FI | 310                        | 605                        | 13.60 ns<br>(100)  | 0.12 |
|              | DF | 310                        | 605                        | 6.38 $\mu$ s (100) |      |
| Ambient      | FI | 330                        | 605                        | 11.78 ns<br>(100)  | 0.08 |
|              | DF | nd                         |                            |                    |      |
| $\text{O}_2$ | FI | 330                        | 605                        | 10.20 ns<br>(100)  | 0.01 |
|              | DF | nd                         |                            |                    |      |



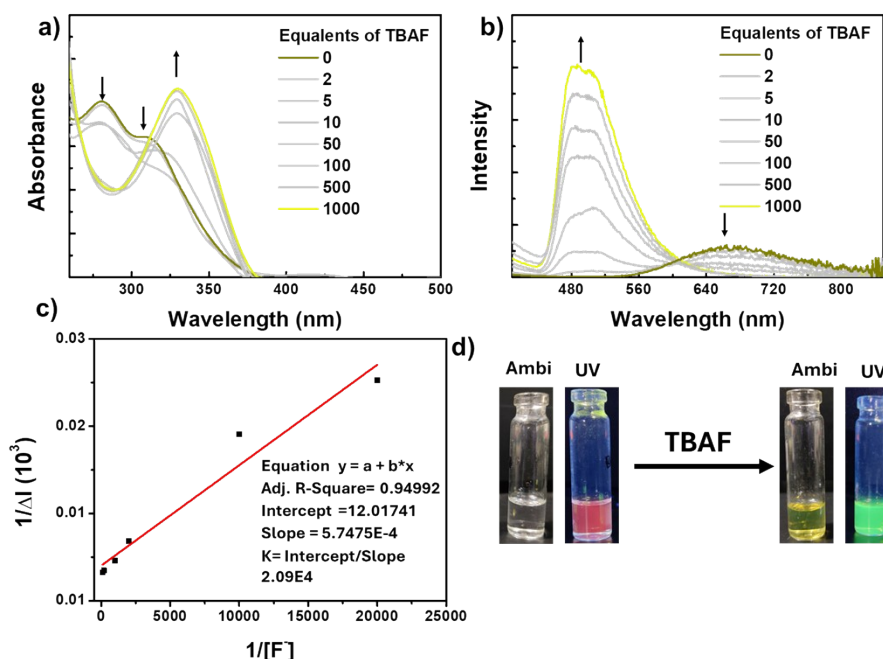

**Figure S20.** Change associated with (a) UV-visible absorption (b) steady-state PL spectra of **BNO** in DCM (Con  $10^{-5}$  M) against different concentrations of tetrabutylammonium fluoride (1M TBAF in DCM). (c) Benesi-Hilderbrand plot for **BNO**:  $1/\Delta I = A + B/[F^-]$ ,  $K = A/B$ . (d) Digital photographs of DCM solution of **BNO** with and without TBAF. [ $K$  is the binding constant].

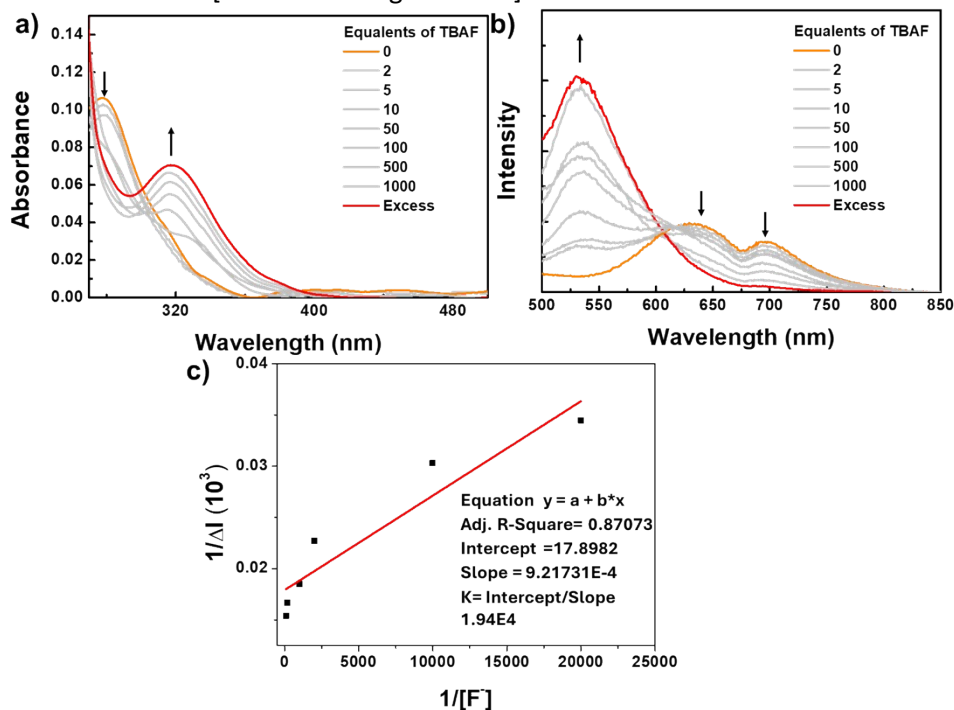

**Figure S21.** Changes associated with (a) UV-visible absorption (b) steady-state PL spectra of **BNS** in DCM (Con  $10^{-5}$  M) against different concentrations of tetrabutylammonium fluoride (1M TBAF in DCM). (c) Benesi-Hilderbrand plot for **BNS**:  $1/\Delta I = A + B/[F^-]$ ,  $K = A/B$ . (d) [ $K$  is the binding constant].

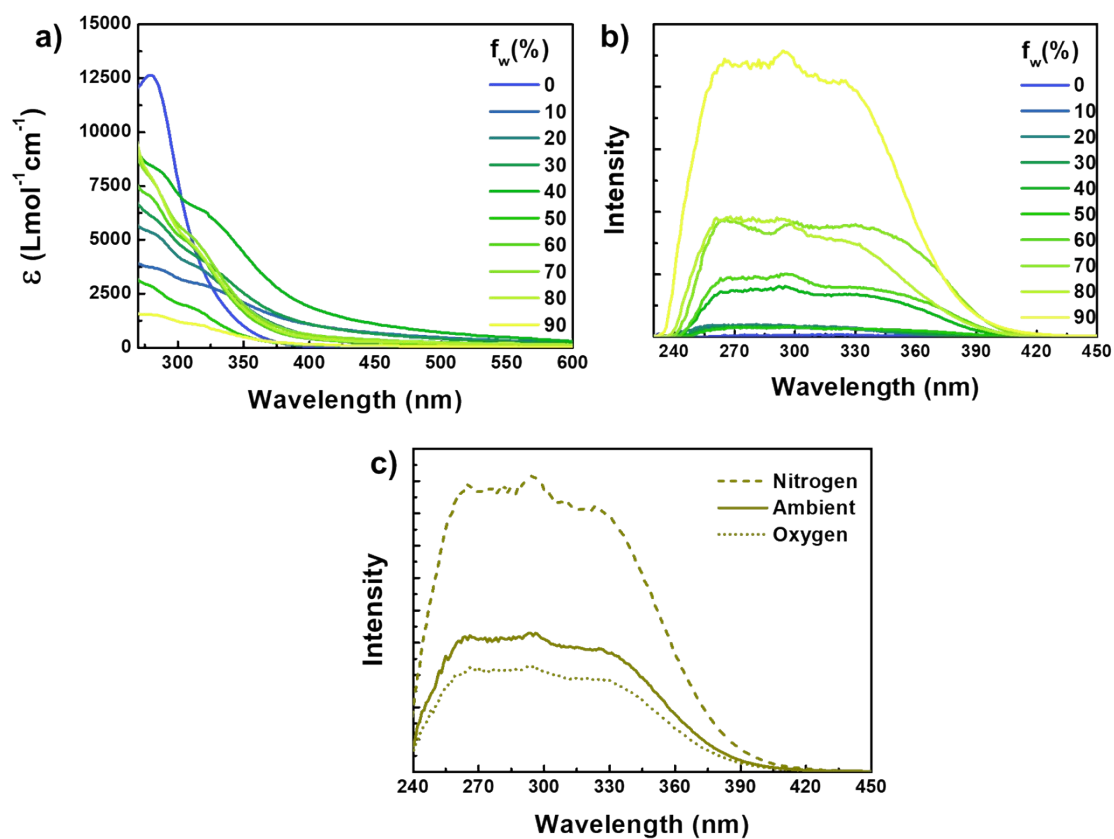

**Figure S22.** (a) Absorption and (b) excitation spectra of **BNO** in DMSO with different water fractions [ $f_w$ ]. (c) excitation spectra for **BNO** in DMSO-water mixture,  $f_w = 90\%$ , under different environments.

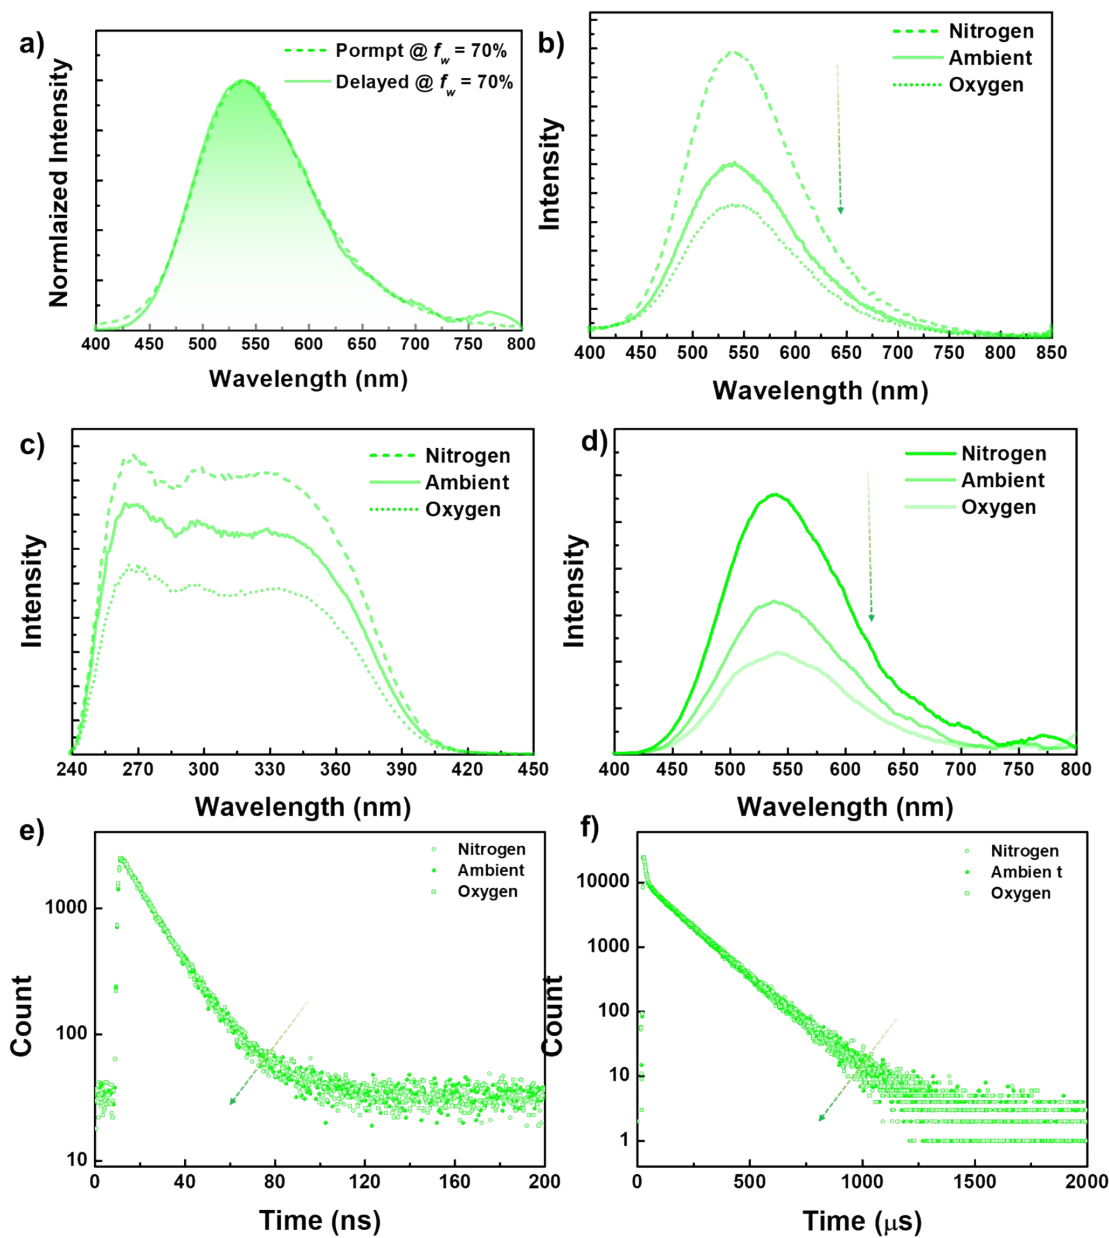

**Figure S23.** (a) Prompt and time-gated [20  $\mu$ s delay] PL spectra for **BNO** in degassed DMSO-water mixture,  $f_w = 70%$ , ( $\lambda_{ex} = 310$  nm). (b) Steady-state PL spectra, (c) excitation spectra, and (d) time-gated [20  $\mu$ s delay] PL spectra for **BNO** in DMSO-water mixture,  $f_w = 70%$  under different environments ( $\lambda_{ex} = 310$  nm). (e) Fluorescence and (d) delayed fluorescence decay plot for **BNO** in DMSO-water mixture,  $f_w = 70%$  ( $\lambda_{ex} = 310$  nm;  $\lambda_{em} = 535$  nm).

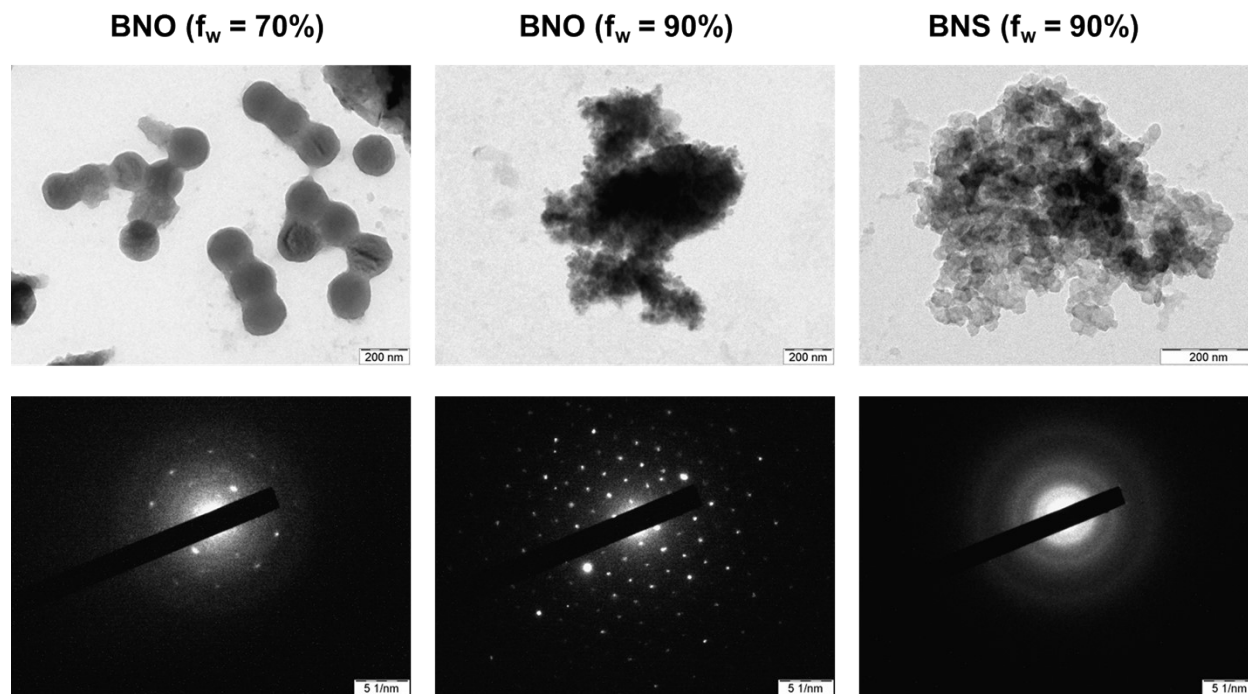

**Figure S24.** TEM images and corresponding selected area electron diffraction (SAED) pattern for aggregates of **BNO**, formed from DMSO-water mixture,  $f_w = 70\%$ ,  $90\%$ , and **BNS** at  $f_w = 90\%$

**Table S8.** FI, DF lifetime, and total photoluminescence quantum yield for **BNO** in DMSO-water mixture,  $f_w = 70\%$  and  $f_w = 90\%$  (conc.  $5 \times 10^{-5}$  M) under different environments.

|                                | $\lambda_{\text{ex}}$<br>(nm) | $\lambda_{\text{em}}$<br>(nm) | FI                    |                       | DF                               |                                   | PLQY |
|--------------------------------|-------------------------------|-------------------------------|-----------------------|-----------------------|----------------------------------|-----------------------------------|------|
|                                |                               |                               | $\tau_1$ ( $A_1$ )    | $\tau_2$ ( $A_2$ )    | $\tau_1$ ( $A_1$ )               | $\tau_2$ ( $A_2$ )                |      |
| <b><math>f_w = 70\%</math></b> |                               |                               |                       |                       |                                  |                                   |      |
| Nitrogen                       | 310                           | 535                           | 14.58 ns<br>(100 %)   | -                     | 60.07 $\mu\text{s}$<br>(6.71 %)  | 146.04 $\mu\text{s}$<br>(93.29 %) | 0.25 |
| Ambient                        | 310                           | 535                           | 14.54 ns<br>(100 %)   | -                     | 26.26 $\mu\text{s}$<br>(3.28 %)  | 145.46 $\mu\text{s}$<br>(96.72 %) | 0.23 |
| Oxygen                         | 310                           | 535                           | 14.41 ns<br>(100 %)   | -                     | 68.23 $\mu\text{s}$<br>(7.74 %)  | 145.45 $\mu\text{s}$<br>(92.26 %) | 0.18 |
| <b><math>f_w = 90\%</math></b> |                               |                               |                       |                       |                                  |                                   |      |
| Nitrogen                       | 310                           | 580                           | 10.39 ns<br>(14.93 %) | 15.64 ns<br>(85.07 %) | 24.98 $\mu\text{s}$<br>(78.17 %) | 109.49 $\mu\text{s}$<br>(21.83 %) | 0.19 |
| Ambient                        | 310                           | 580                           |                       |                       | 24.60 $\mu\text{s}$<br>(83.24 %) | 81.60 $\mu\text{s}$<br>(16.76 %)  | 0.18 |
| Oxygen                         | 310                           | 580                           | 9.26 ns<br>(57.53 %)  | 19.71 ns<br>(42.47 %) | 18.26 $\mu\text{s}$<br>(68.99 %) | 119.20 $\mu\text{s}$<br>(31.01 %) | 0.17 |

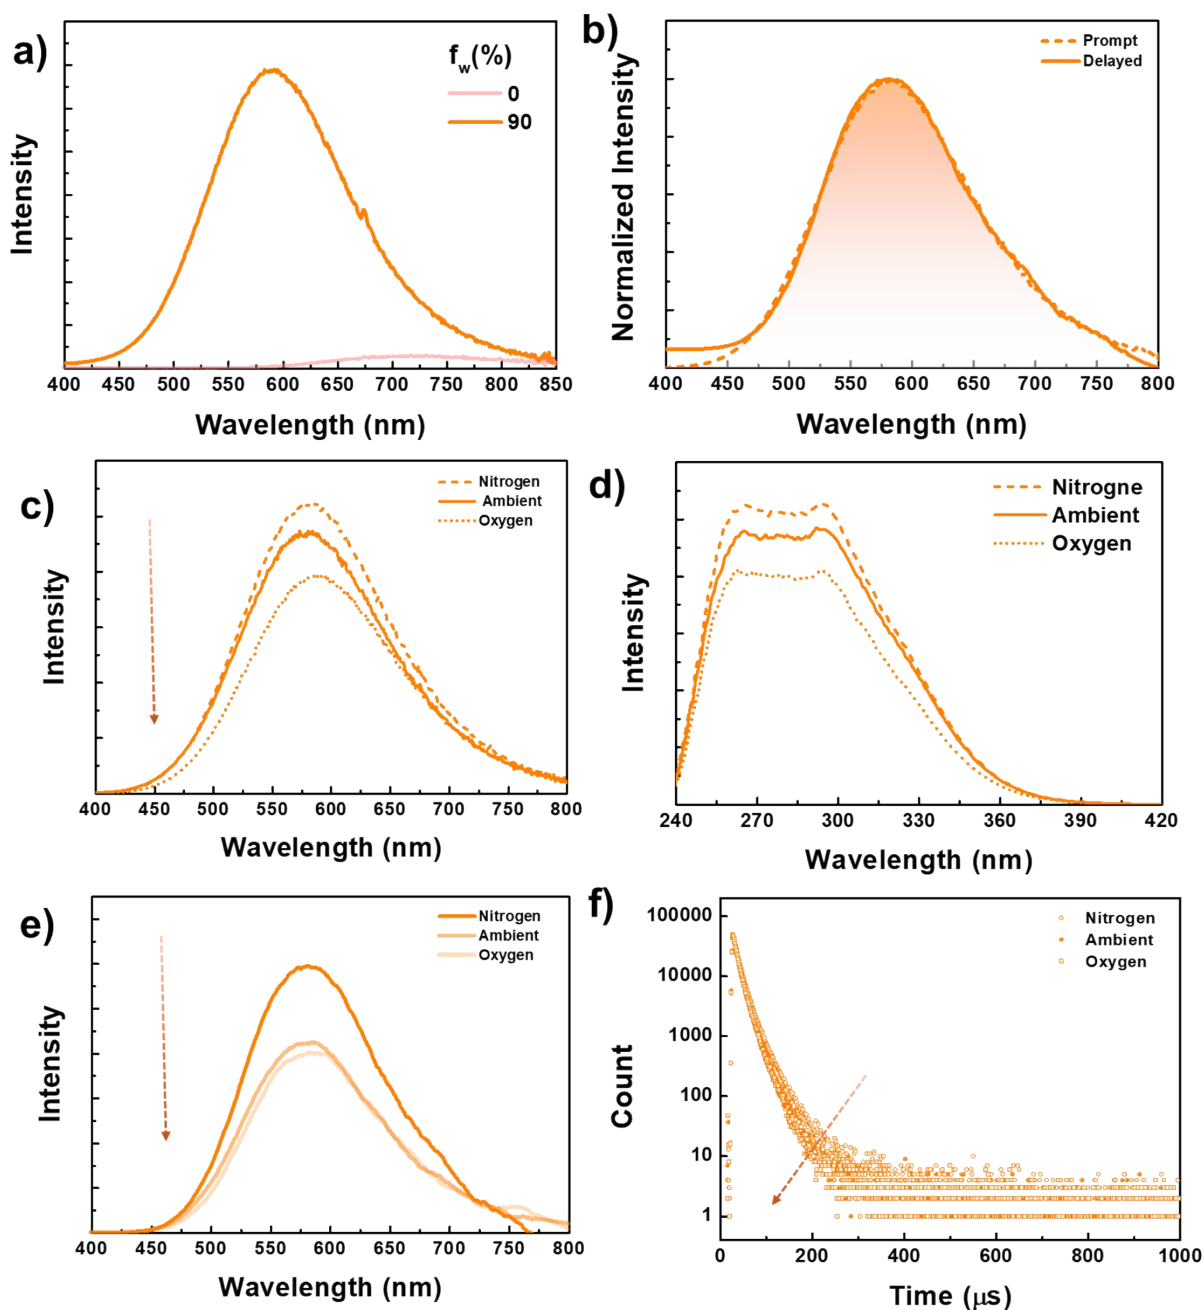

**Figure S25.** (a) Steady-state PL spectra of **BNS** in DMSO and DMSO-water mixture,  $f_w=90\%$  ( $\lambda_{ex} = 280$  nm). (b) Prompt and time-gated [20  $\mu$ s delay] PL spectra for **BNS** in DMSO-water mixture,  $f_w = 90\%$ , purged with nitrogen gas ( $\lambda_{ex} = 280$  nm). (c) Steady-state PL spectra, (d) excitation spectra, and (e) Time-gated [20  $\mu$ s delay] PL spectra for **BNS** in DMSO-water mixture,  $f_w = 90\%$ , under different environments ( $\lambda_{ex} = 280$  nm). (e) FI, DF, decay plot for aggregates of **BNS** in DMSO-water mixture,  $f_w = 70\%$  (conc.  $5 \times 10^{-5}$  M,  $\lambda_{ex} = 280$  nm, and  $\lambda_{em} = 580$  nm).

**Table S9.** FI, DF lifetime, and total photoluminescence quantum yield for **BNS** in DMSO-water mixture,  $f_w = 90\%$  under different environments (conc.  $5 \times 10^{-5}$  M) .

|          | $\lambda_{\text{ex}}$<br>(nm) | $\lambda_{\text{em}}$<br>(nm) | FI                         |                            | DF                               |                                  | PLQY |
|----------|-------------------------------|-------------------------------|----------------------------|----------------------------|----------------------------------|----------------------------------|------|
|          |                               |                               | $\tau_1$ (A <sub>1</sub> ) | $\tau_2$ (A <sub>2</sub> ) | $\tau_1$ (A <sub>1</sub> )       | $\tau_2$ (A <sub>2</sub> )       |      |
| Nitrogen | 280                           | 580                           | 10.31 ns<br>(100 %)        | -                          | 13.52 $\mu\text{s}$<br>(66.58 %) | 32.96 $\mu\text{s}$<br>(33.42 %) | 0.32 |
| Ambient  | 280                           | 580                           | 9.62 ns<br>(100 %)         | -                          | 10.57 $\mu\text{s}$<br>(63.21 %) | 25.99 $\mu\text{s}$<br>(36.79 %) | 0.31 |
| Oxygen   | 280                           | 580                           | 9.34 ns<br>(100 %)         | -                          | 10.97 $\mu\text{s}$<br>(66.29 %) | 25.53 $\mu\text{s}$<br>(33.71 %) | 0.25 |

**Table S10.** Lifetime, PLQY values and corresponding radiative and nonradiative decay rate for **BNO** and **BNS** in degassed hexane and DMSO-water mixture [ $f_w = 70\%$  and  $f_w = 90\%$ ] (conc.  $5 \times 10^{-5}$  M).

| $\lambda_{\text{ex}}$<br>[nm]   | $\lambda_{\text{em}}$<br>[nm] | $\tau_{\text{PF}}$<br>[ns] | $\tau_{\text{DF}}$ [ $\mu\text{s}$ ] | $\Phi_{\text{Total}}$ | $\Phi_{\text{PF}}$ | $\Phi_{\text{DF}}$<br>[%] | $k_{\text{PF}}$<br>[ $10^7 \text{s}^{-1}$ ] | $k_{\text{DF}}$<br>[ $10^3 \text{s}^{-1}$ ] | $k_{\text{ICS}}$<br>[ $10^7 \text{s}^{-1}$ ] | $k_{\text{rICS}}$<br>[ $10^4 \text{s}^{-1}$ ] | $k_{\text{nr(s)}}$<br>[ $10^7 \text{s}^{-1}$ ] |
|---------------------------------|-------------------------------|----------------------------|--------------------------------------|-----------------------|--------------------|---------------------------|---------------------------------------------|---------------------------------------------|----------------------------------------------|-----------------------------------------------|------------------------------------------------|
| BNO (Hexane)                    |                               |                            |                                      |                       |                    |                           |                                             |                                             |                                              |                                               |                                                |
| 310                             | 605                           | 13.60                      | 6.38                                 | 12.0                  | 1.2                | 10.80                     | 0.88                                        | 16.9                                        | 6.6                                          | 15.67                                         | 6.47                                           |
| BNO (DMSO-Water: $f_w = 70\%$ ) |                               |                            |                                      |                       |                    |                           |                                             |                                             |                                              |                                               |                                                |
| 310                             | 535                           | 14.41                      | 140.27                               | 25.0                  | 18.1               | 6.9                       | 12.41                                       | 0.49                                        | 1.89                                         | 0.10                                          | 37.24                                          |
| BNO (DMSO-Water: $f_w = 90\%$ ) |                               |                            |                                      |                       |                    |                           |                                             |                                             |                                              |                                               |                                                |
| 310                             | 580                           | 14.08                      | 43.42                                | 19.2                  | 17.1               | 2.1                       | 12.14                                       | 0.48                                        | 0.77                                         | 0.25                                          | 51.11                                          |
| BNS (DMSO-Water: $f_w = 90\%$ ) |                               |                            |                                      |                       |                    |                           |                                             |                                             |                                              |                                               |                                                |
| 280                             | 580                           | 10.31                      | 20.02                                | 0.32                  | 0.25               | 0.7                       | 2.46                                        | 3.09                                        | 1.90                                         | 6.21                                          | 5.3.3                                          |

$\tau_{\text{PF}}$  and  $\tau_{\text{DF}}$  are the average fluorescence and delayed fluorescence lifetime.  $\Phi_{\text{Total}}$  is total PLQY,  $\Phi_{\text{PF}}$ , and  $\Phi_{\text{DF}}$  PLQY for prompt and delayed fluorescence,  $k_{\text{PF}}$ ,  $k_{\text{DF}}$ ,  $k_{\text{ICS}}$ ,  $k_{\text{rISC}}$ ,  $k_{\text{nr(s)}}$  are the rate fluorescence decay, delayed fluorescence decay, intersystem crossing, reverse intersystem crossing, non-radiative decay from singlet respectively.  $\lambda_{\text{ex}}$  and  $\lambda_{\text{em}}$  are the excitation and emission wavelengths, respectively.

## The equation for Calculating Delayed Fluorescence Rate Constant in solution <sup>5</sup>

$$k_r^{PF} = \frac{\phi_{PF}}{\tau_{PF}}$$

$$k_r^{DF} = \frac{\phi_{DF}}{\tau_{DF}}$$

$$k_{Total}^{PF} = \frac{1}{\tau_{PF}}$$

$$k_{Total}^{DF} = \frac{1}{\tau_{DF}}$$

$$k_{nr}^{ISC} = \frac{\phi_{DF} k_{Total}^{PF}}{\phi_{total}}$$

$$k_{nr}^{rISC} = \frac{\phi_{DF} k_{Total}^{PF} k_{Total}^{DF}}{k_{nr}^{ISC} \phi_{PF}}$$

$$k_{nr}^S = \frac{1}{\tau_{PF}} - (k_r^{PF} + k_{nr}^{ISC})$$

$k_{Total}^{PF}$  = Total decay Rate of prompt component

$k_{Total}^{DF}$  = Total decay rate of delayed component

$k_r^{PF}$  = Radiative decay rate of prompt component

$k_r^{DF}$  = Radiative decay rate of delayed component

$k_{nr}^{ISC}$  = Rate of intersystem crossing

$k_{nr}^{rISC}$  = Rate of reverse intersystem crossing

$k_{nr}^S$  = Non radiative decay rate from  $S_1$

$\tau_{PF}$  = Lifetime of Prompt component

$\tau_{DF}$  = Lifetime of Prompt component

$\phi_{total}$  = Total photoluminescence quantum yield

$\phi_{PF}$  = Prompt fluorescence quantum yield

$\phi_{DF}$  = Delayed fluorescence quantum yield

## 5.2 Solid-state photoluminescence studies

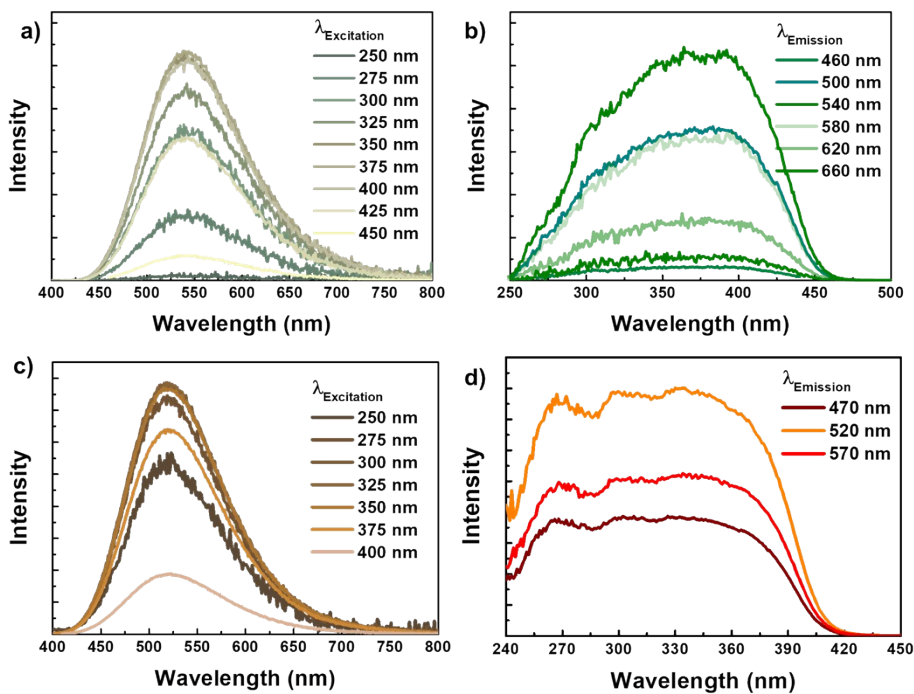

**Figure S26.** Excitation-dependent PL and corresponding excitation spectra of (a and b) BNO and (c and d) BNS.

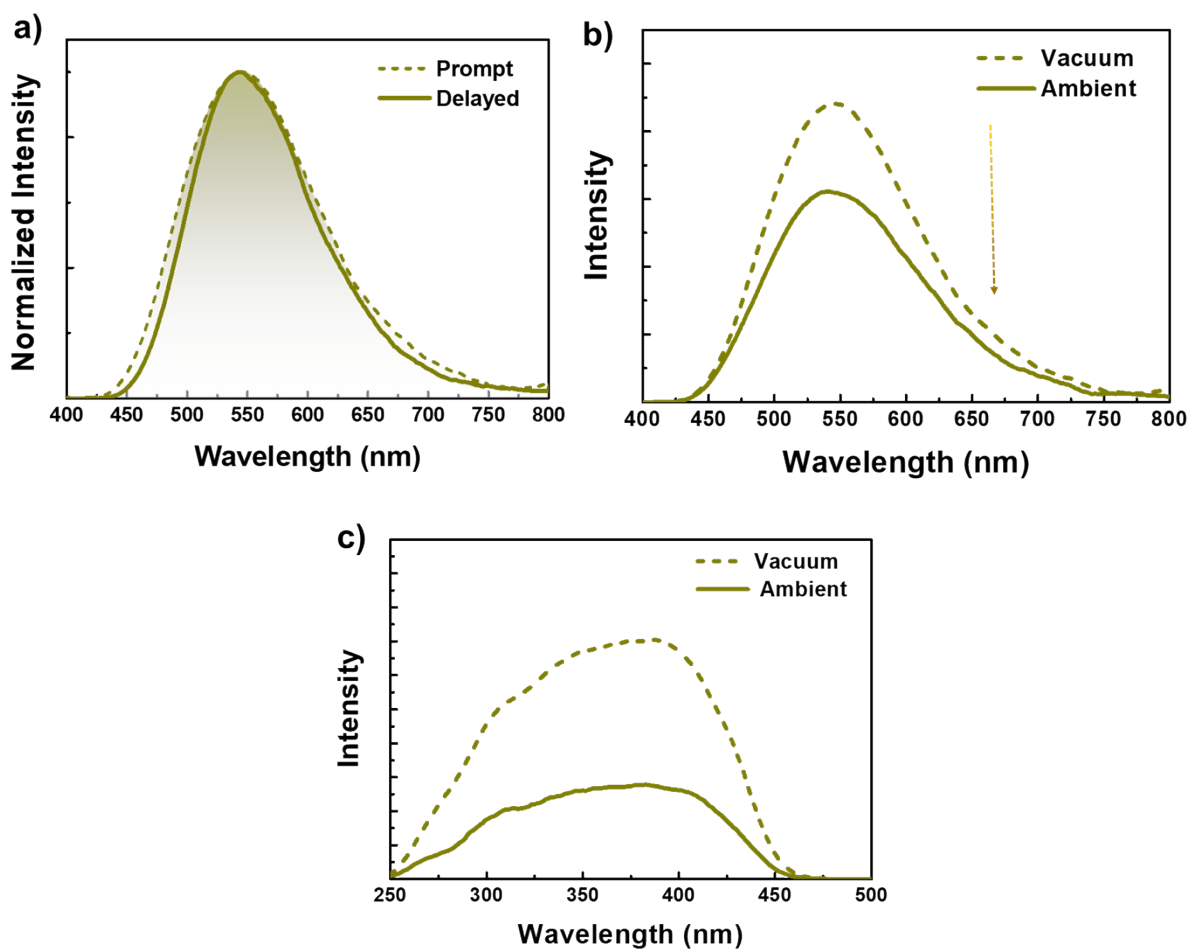

**Figure S27.** (a) Prompt and time-gated [50  $\mu$ s delay] PL spectra for the solids of **BNO** at 298 K under ambient conditions ( $\lambda_{\text{ex}} = 375$  nm). (b) Steady-state PL spectra, (c) excitation spectra, for the solids of **BNO** at 298 K under vacuum (absence of  $\text{O}_2$ ) and ambient (presence of  $\text{O}_2$ ) ( $\lambda_{\text{ex}} = 375$  nm).



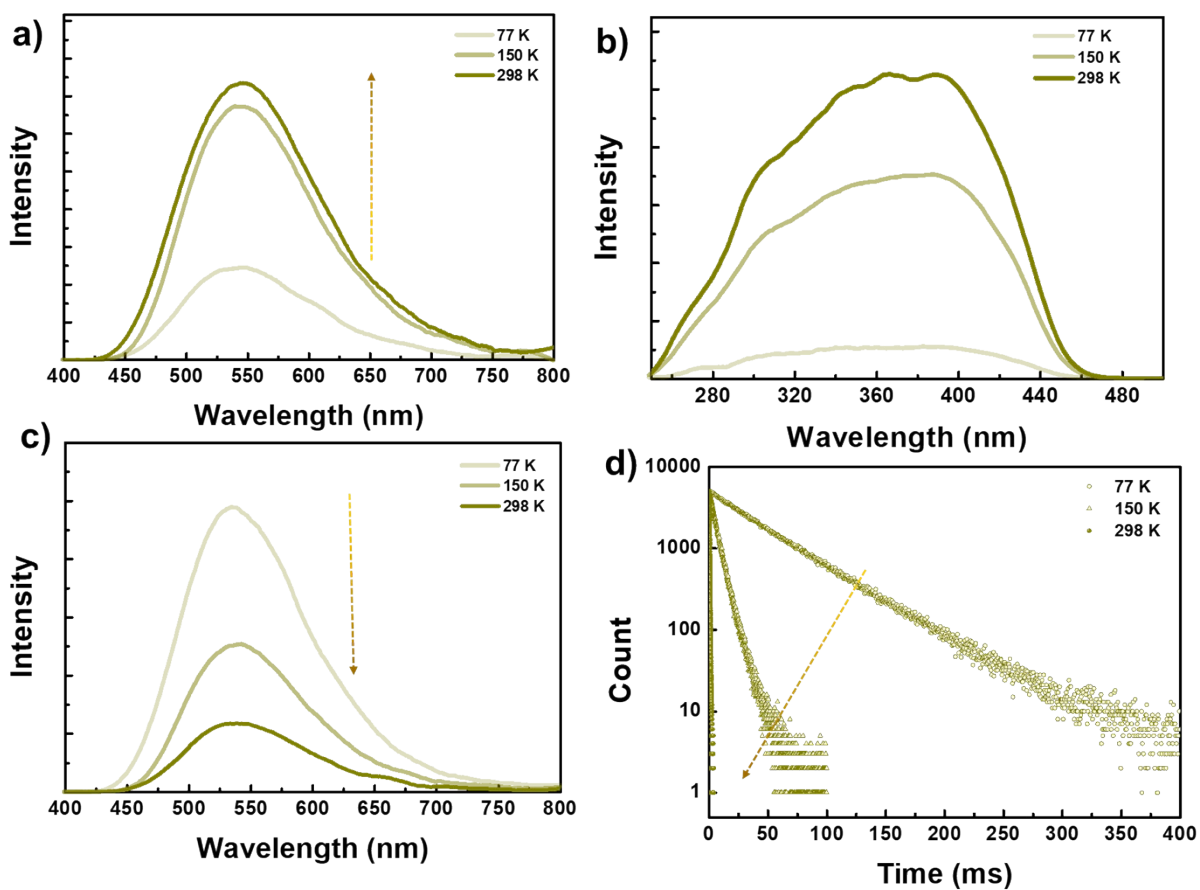

**Figure S28.** (a) Steady-state PL, (b) excitation spectra, (c) time-gated PL spectra, and (d) DF decay [ $\lambda_{em} = 540$  nm] plot for the solids of **BNO** at a different temperature under vacuum (absence of  $O_2$ ) ( $\lambda_{ex} = 375$  nm).

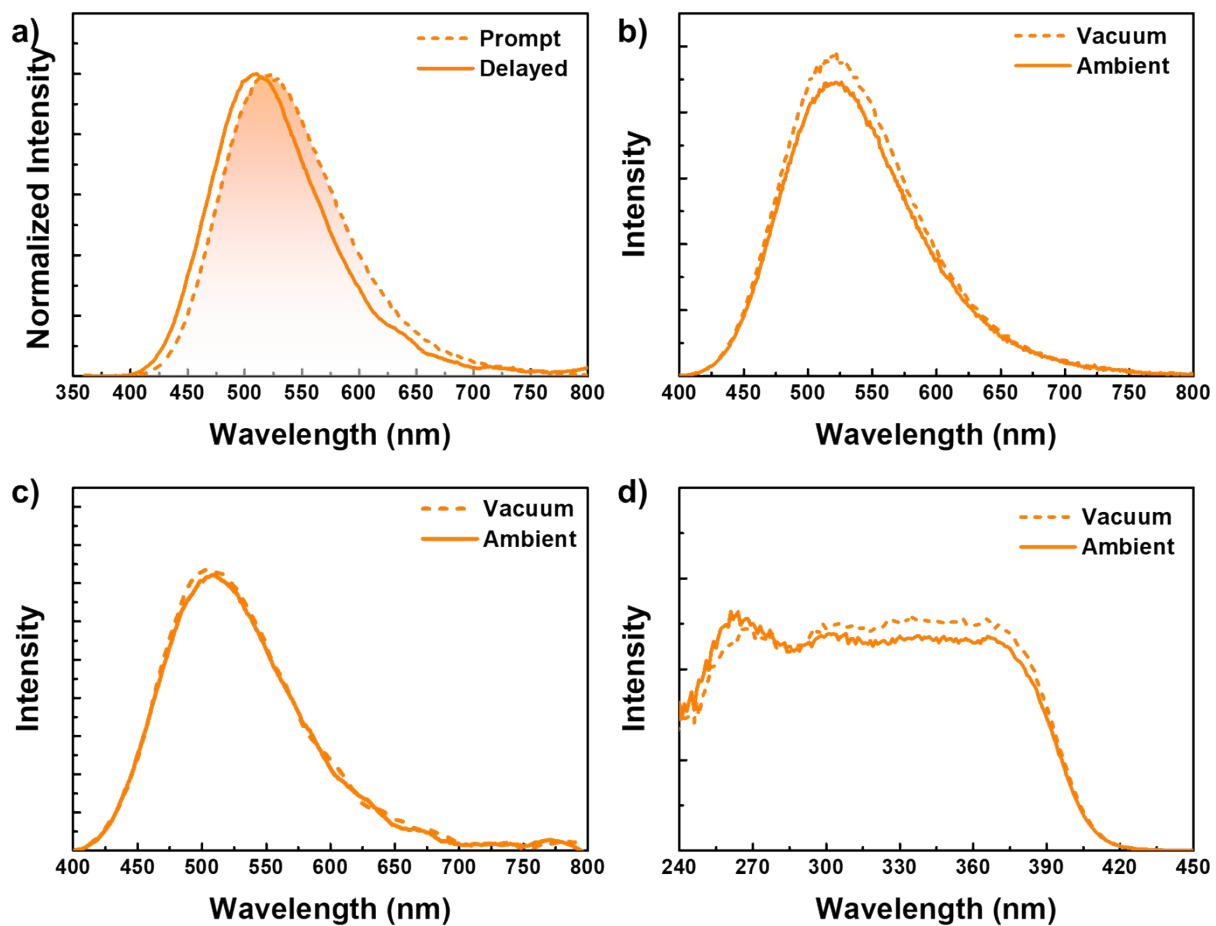

**Figure S29.** (a) Prompt and time-gated/delayed [50  $\mu\text{s}$  delay] PL spectra for the solids of **BNS** at 298 K under ambient conditions ( $\lambda_{\text{ex}} = 350$  nm). (b) Steady-state PL spectra, (c) time-gated [50 $\mu\text{s}$  delay] PL, and (d) excitation spectra [ $\lambda_{\text{em}} = 520$  nm] for the solids of **BNS** at 298 K under vacuum (absence of  $\text{O}_2$ ) and ambient (presence of  $\text{O}_2$ ) ( $\lambda_{\text{ex}} = 375$  nm).

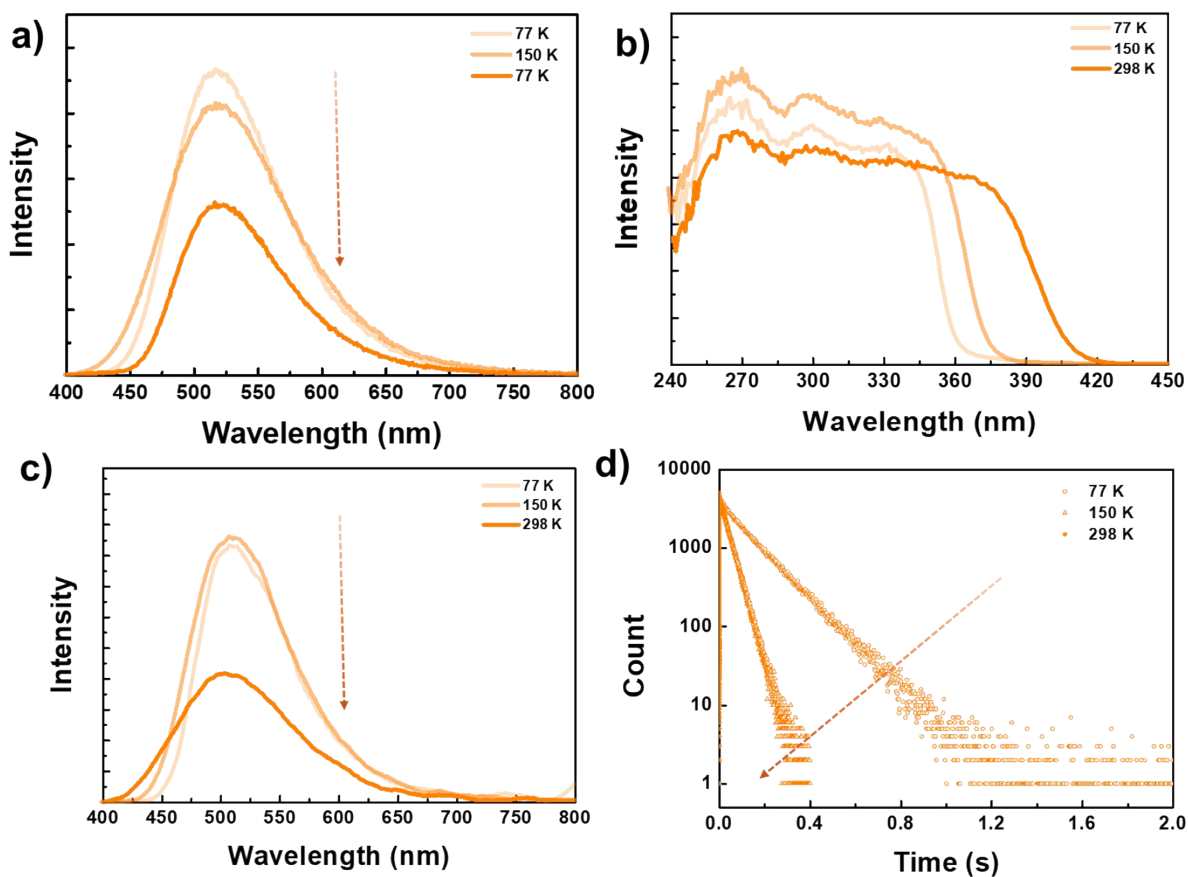

**Figure S30.** (a) Steady-state PL spectra (b) excitation spectra, (c) time-gated PL spectra, and (d) phosphorescence decay plot [ $\lambda_{em} = 500$  nm] for the solids of **BNS** at a different temperature under vacuum (absence of  $O_2$ ) ( $\lambda_{ex} = 350$  nm).

**Table S11.** FI and DF/Phosphorescence (PH)\* lifetime for the solids of **BNO** and **BNS** at different temperatures under vacuum (absence of O<sub>2</sub>) and ambient conditions (298 K).

| Temperature (K) | $\lambda_{\text{ex}}$ (nm) | $\lambda_{\text{em}}$ (nm) | FI lifetime                |                            | DF /PH* lifetime |                            |                            |
|-----------------|----------------------------|----------------------------|----------------------------|----------------------------|------------------|----------------------------|----------------------------|
|                 |                            |                            | $\tau_1$ (A <sub>1</sub> ) | $\tau_2$ (A <sub>2</sub> ) |                  | $\tau_1$ (A <sub>1</sub> ) | $\tau_2$ (A <sub>2</sub> ) |
| <b>BNO</b>      |                            |                            |                            |                            |                  |                            |                            |
| 77              | 375                        | 540                        | 13.90 ns (100 %)           | -                          | 540              | 38.12 ms (39.14 %)         | 55.76 ms (60.86 %)         |
| 150             | 375                        | 540                        | 13.71 ns (100 %)           | -                          | 540              | 5.18 ms (61.43 %)          | 9.13 ms (38.57 %)          |
| 298 (Vacuum)    | 375                        | 540                        | 14.43 ns (100 %)           | -                          | 540              | 219.81 $\mu$ s (11.20%)    | 327.82 $\mu$ s (88.80%)    |
| 298 (Ambient)   | 375                        | 540                        | 13.92 ns (100%)            |                            | 540              | 131.06 $\mu$ s (46.17 %)   | 181.07 $\mu$ s (23.83 %)   |
| <b>BNS</b>      |                            |                            |                            |                            |                  |                            |                            |
| 77              | 375                        | 520                        | 2.35 ns (37.15 %)          | 9.74 ns (62.85 %)          | 505*             | 31.62 ms (1.81 %)          | 146.18 ms(98.19 %)         |
| 150             | 375                        | 520                        | 8.99 ns (100 %)            | -                          | 505*             | 41.16 ms (100 %)           | -                          |
| 298 (Vacuum)    | 375                        | 520                        | 9.94 ns (100 %)            | -                          | 500*             | 91.38 $\mu$ s (100 %)      | -                          |
| 298 (Ambient)   | 375                        | 520                        | 9.87 ns (100%)             |                            | 500*             | 91.03 $\mu$ s (100 %)      | -                          |

## 5.4 Photoluminescence of films (doped in polymer and neat) of BNO and BNS

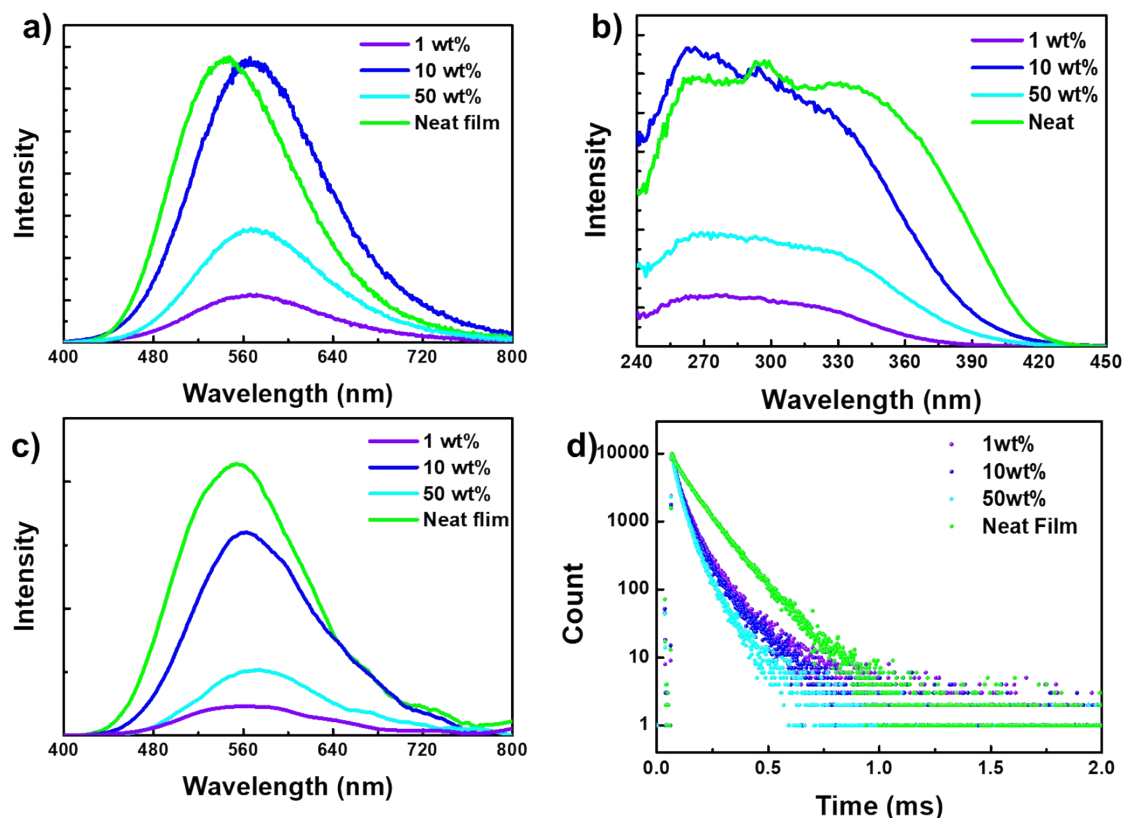

**Figure S31.** (a, b) Steady-state PL and corresponding excitation spectra for **BNO** doped in PMMA with different loading concentrations and corresponding neat film ( $\lambda_{\text{ex}} = 330$  nm respectively). (c) Time gated /Delayed spectra [50  $\mu\text{s}$  delay] PL spectra and (d) delayed fluorescence decay under vacuum atmosphere at 298 K for **BNO** doped in PMMA with different loading concentration and corresponding neat film ( $\lambda_{\text{ex}} = 330$  nm,  $\lambda_{\text{em}} = 568$  nm for doped film and 545 nm for neat film).

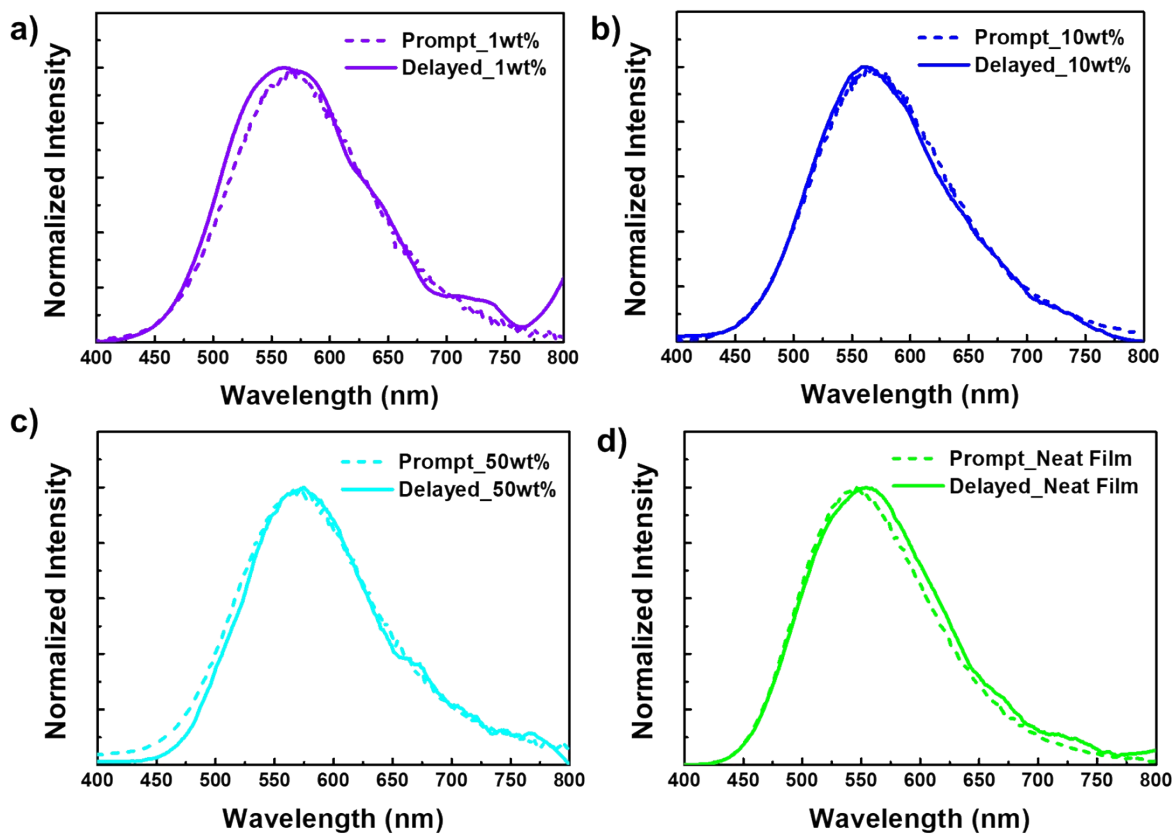

**Figure S32.** Prompt and time-gated/delayed [50  $\mu$ s delay] PL spectra for **BNO** doped in PMMA with doping concentration (a) 1wt%, (b) 10wt%, (c) 50wt% and as neat film at  $\lambda_{ex} = 330$  nm

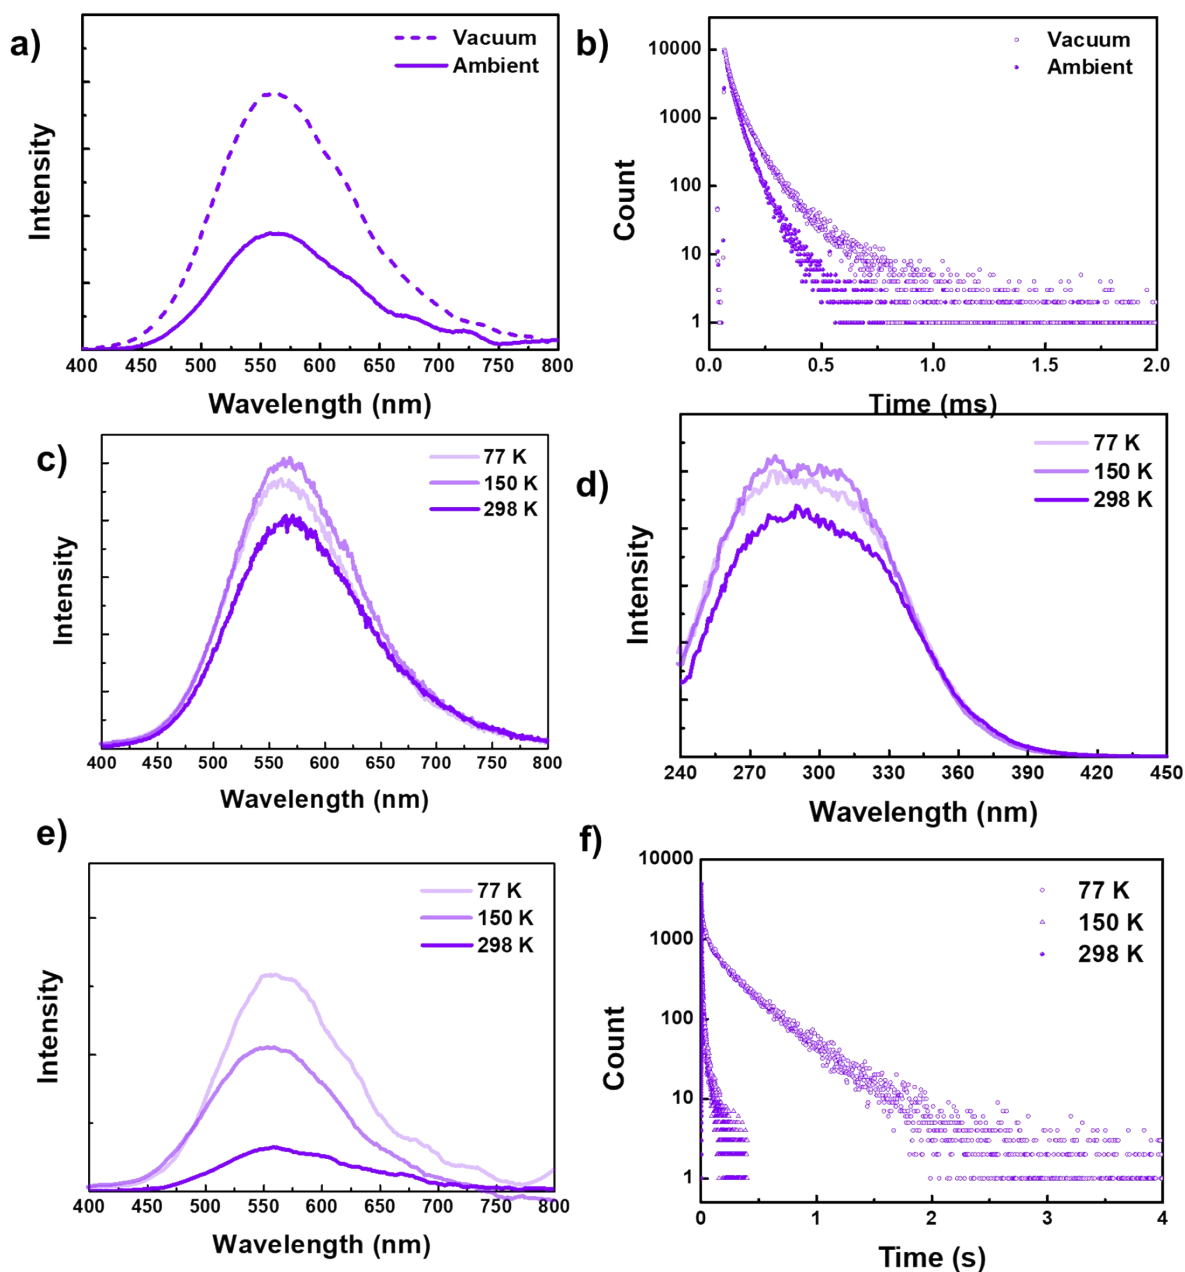

**Figure S33.** (a) Time-gated/delayed [50 $\mu$ s delay] PL spectra and (b) delayed fluorescence decay [ $\lambda_{em} = 540$  nm] for **BNO** doped in PMMA (1wt%) at 298 K under vacuum (absence of O<sub>2</sub>) and ambient (presence of O<sub>2</sub>) at  $\lambda_{ex} = 330$  nm, (c) Steady-state PL spectra, (d) excitation spectra, (e) time-gated/delayed [50 $\mu$ s delay] PL spectra, and (f) delayed fluorescence decay for **BNO** doped in PMMA (1wt%) at  $\lambda_{ex} = 330$  nm and  $\lambda_{em} = 540$  nm under vacuum at different temperatures.

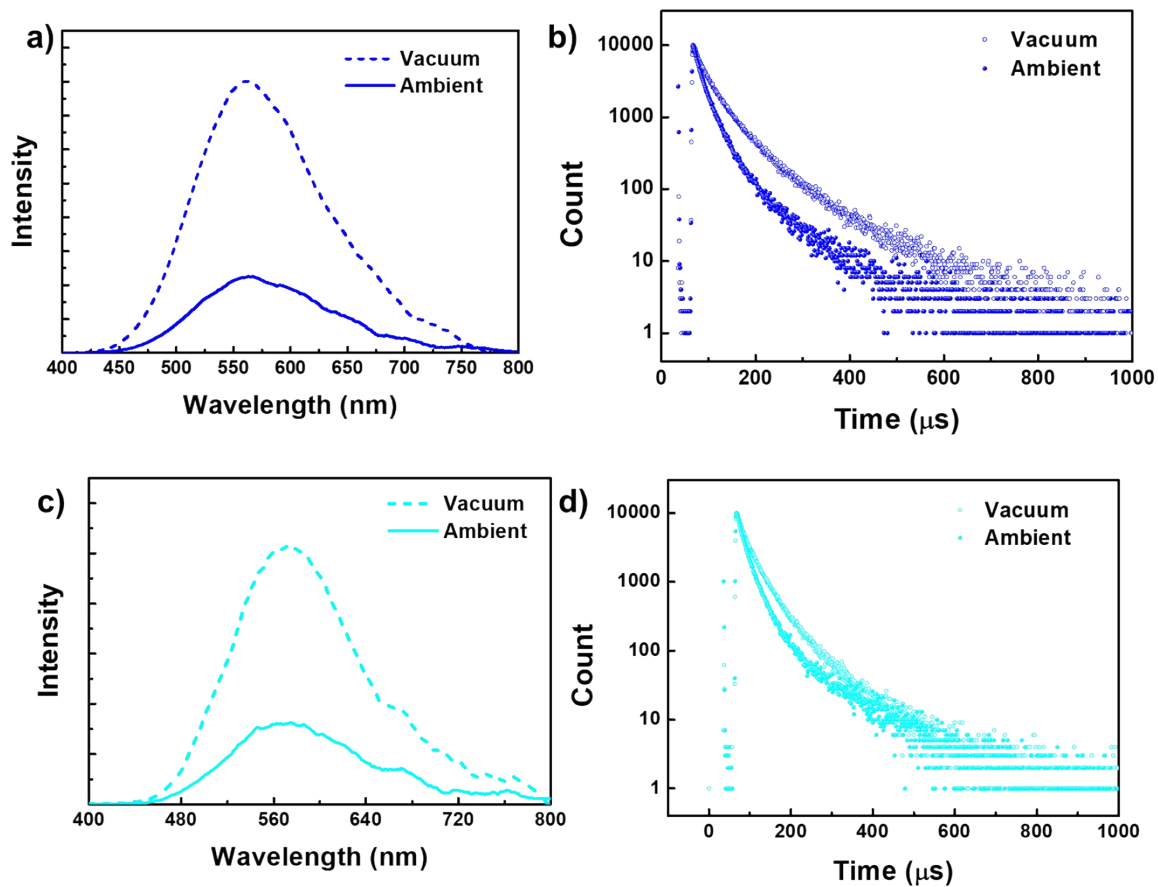

**Figure S34.** (a, c) Time-gated/delayed [50 $\mu\text{s}$  delay] PL spectra and (b, d) delayed fluorescence decay [ $\lambda_{\text{em}} = 540$  nm] for **BNO** doped in PMMA with doping concentrations (a,b)10 wt% (c,d) 50 wt% at 298 K under vacuum (absence of  $\text{O}_2$ ) and ambient (presence of  $\text{O}_2$ ) at  $\lambda_{\text{ex}} = 330$  nm.



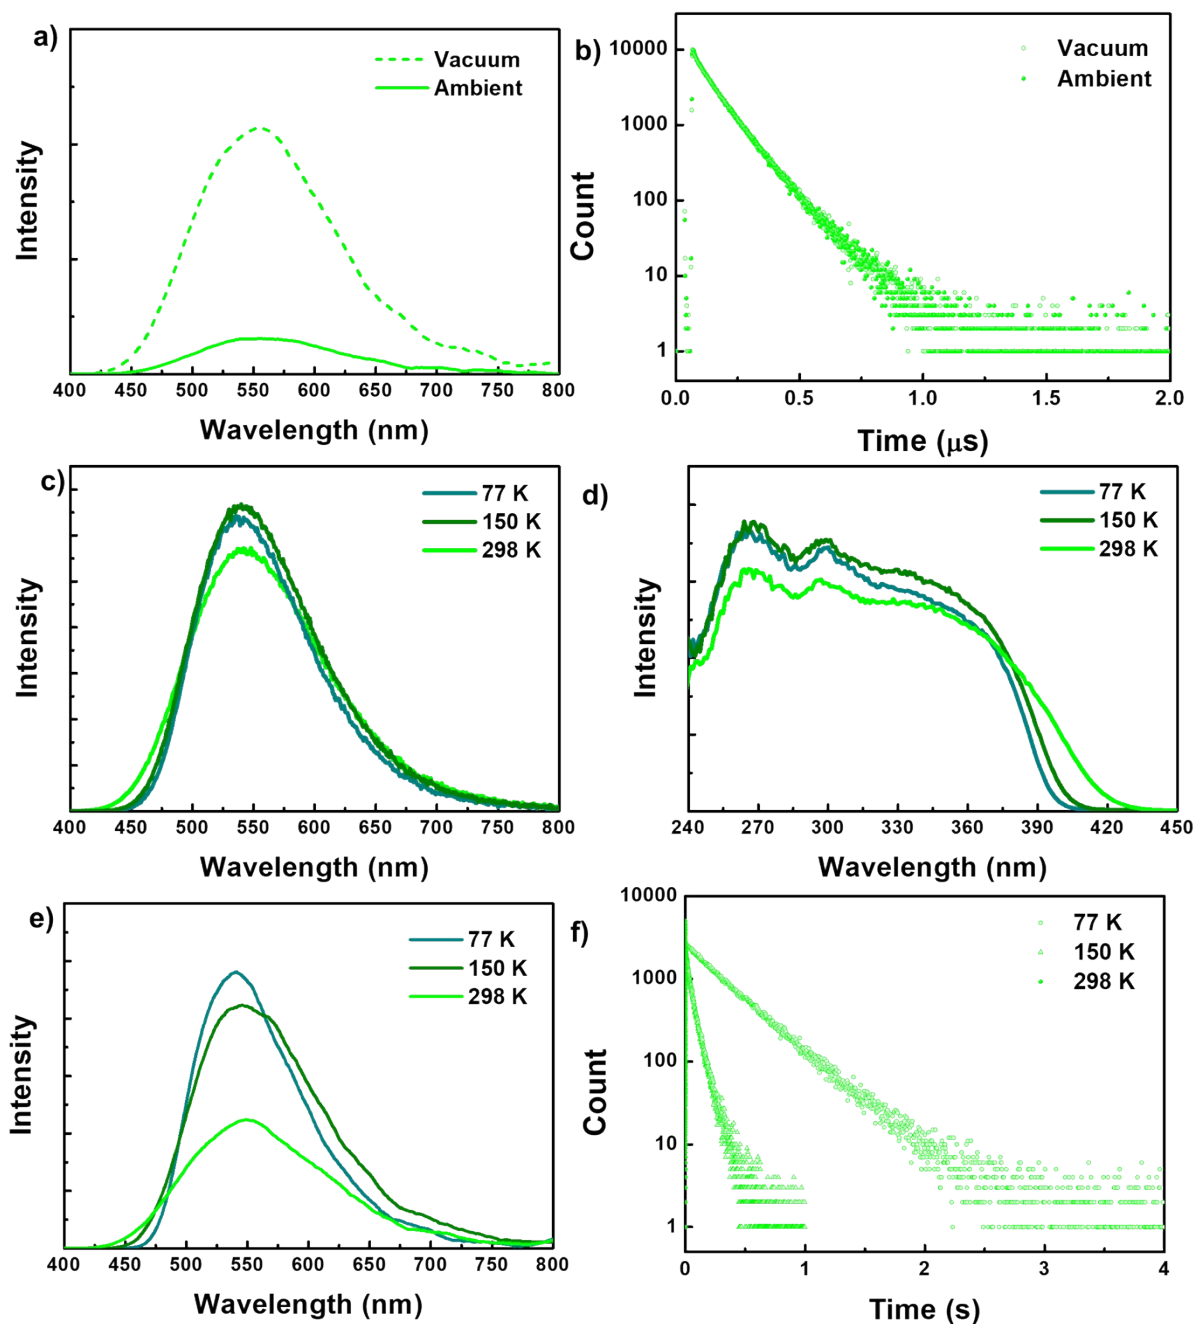

**Figure S35.**(a) Time-gated/delayed [50 $\mu$ s delay] PL spectra and (b) delayed fluorescence decay [ $\lambda_{em} = 545$  nm] for the neat film of **BNO** at 298 K under vacuum (absence of O<sub>2</sub>) and ambient (presence of O<sub>2</sub>) at  $\lambda_{ex} = 330$  nm. (c) Steady-state PL spectra, (d) excitation spectra, (e) time-gated/delayed [50 $\mu$ s delay] PL spectra, and (f) delayed fluorescence decay for the neat film of **BNO** at  $\lambda_{ex} = 330$  nm and  $\lambda_{em} = 545$  nm under vacuum at different temperature.

**Table S12.** Fluorescence (FI) and Delayed fluorescence (DF) lifetime for **BNO** doped in PPMA with different loading concentrations and corresponding neat film at 298 K under vacuum (absence of O<sub>2</sub>) and ambient (presence of O<sub>2</sub>).

|       |      | Fluorescence lifetime         |                               |                     |               |     | Delayed fluorescence lifetime |                             | PLQY |
|-------|------|-------------------------------|-------------------------------|---------------------|---------------|-----|-------------------------------|-----------------------------|------|
|       |      | $\lambda_{\text{ex}}$<br>(nm) | $\lambda_{\text{em}}$<br>(nm) | $\tau_1(A_1)$       | $\tau_2(A_2)$ |     | $\lambda_{\text{em}}$<br>(nm) | $\tau_1(A_1)$               |      |
| 1wt%  | Vac  | 310                           | 568                           | 16.32 ns<br>(100 %) | -             | 568 | 38.97 $\mu$ s<br>(62.45 %)    | 122.04 $\mu$ s<br>(37.55 %) | 0.30 |
|       | Ambi | 310                           | 568                           | 15.92 ns<br>(100%)  |               | 568 | 25.81 $\mu$ s<br>(62.65 %)    | 68.17 $\mu$ s<br>(37.35 %)  |      |
| 10wt% | Vac  | 310                           | 568                           | 17.06 ns<br>(100%)  |               | 568 | 29.99 $\mu$ s<br>(59.39 %)    | 93.48 $\mu$ s<br>(40.61 %)  | 0.48 |
|       | Ambi | 310                           | 568                           | 16.85 ns<br>(100%)  |               | 568 | 20.84 $\mu$ s<br>(75.09 %)    | 76.91 $\mu$ s<br>(24.91 %)  |      |
| 50wt% | Vac  | 310                           | 568                           | 16.67 ns<br>(100%)  |               | 568 | 27.04 $\mu$ s<br>(64.26 %)    | 77.94 $\mu$ s<br>(35.74 %)  | 0.50 |
|       | Ambi | 310                           | 568                           | 16.53 ns<br>(100%)  |               | 568 | 21.35 $\mu$ s<br>(77.83 %)    | 93.15 $\mu$ s<br>(22.17 %)  |      |
| Neat  | Vac  | 310                           | 545                           | 14.40 ns<br>(100%)  |               | 545 | 73.74 $\mu$ s<br>(52.25 %)    | 130.38 $\mu$ s<br>(47.75 %) | 0.63 |
|       | Ambi | 310                           | 545                           | 14.02 ns<br>(100%)  |               | 545 | 65.05 $\mu$ s<br>(41.70 %)    | 123.32 $\mu$ s<br>(58.30 %) |      |

**Table S13.** Fluorescence (FI) and Delayed fluorescence (DF) lifetime for **BNO** doped in PPMA (1wt%) and corresponding neat film at different temperatures under vacuum (absence of O<sub>2</sub>).

| Temperature      | Fluorescence lifetime      |                            |                            |                            | Delayed fluorescence lifetime |                            |                             |
|------------------|----------------------------|----------------------------|----------------------------|----------------------------|-------------------------------|----------------------------|-----------------------------|
|                  | $\lambda_{\text{ex}}$ (nm) | $\lambda_{\text{em}}$ (nm) | $\tau_1$ (A <sub>1</sub> ) | $\tau_2$ (A <sub>2</sub> ) | $\lambda_{\text{em}}$ (nm)    | $\tau_1$ (A <sub>1</sub> ) | $\tau_2$ (A <sub>2</sub> )  |
| <b>1wt%</b>      |                            |                            |                            |                            |                               |                            |                             |
| 77 K             | 310                        | 568                        | 20.02 ns<br>(100)          | -                          | 568                           | 67.01 ms<br>(18.89 %)      | 146.18 ms<br>(81.11 %)      |
| 150 K            | 310                        | 568                        | 19.07 ns<br>(100 %)        | -                          | 568                           | 5.69 ms<br>(50.45 %)       | 39.18 ms<br>(49.55 %)       |
| 298 K            | 310                        | 568                        | 16.32 ns<br>(100 %)        | -                          | 568                           | 38.97 $\mu$ s<br>(62.45 %) | 122.04 $\mu$ s<br>(37.55 %) |
| <b>Neat Film</b> |                            |                            |                            |                            |                               |                            |                             |
| 77 K             | 310                        | 545                        | 12.33 ns<br>(100)          | -                          | 560                           | 100.1 ms<br>(3.95 %)       | 349.97 ms<br>(96.05 %)      |
| 150 K            | 310                        | 545                        | 13.16 ns<br>(100 %)        | -                          | 560                           | 23.62 ms<br>(35.57 %)      | 69.31 ms<br>(64.43 %)       |
| 298 K            | 310                        | 545                        | 14.40 ns<br>(100%)         |                            | 545                           | 73.74 $\mu$ s<br>(52.25 %) | 130.38 $\mu$ s<br>(47.75 %) |

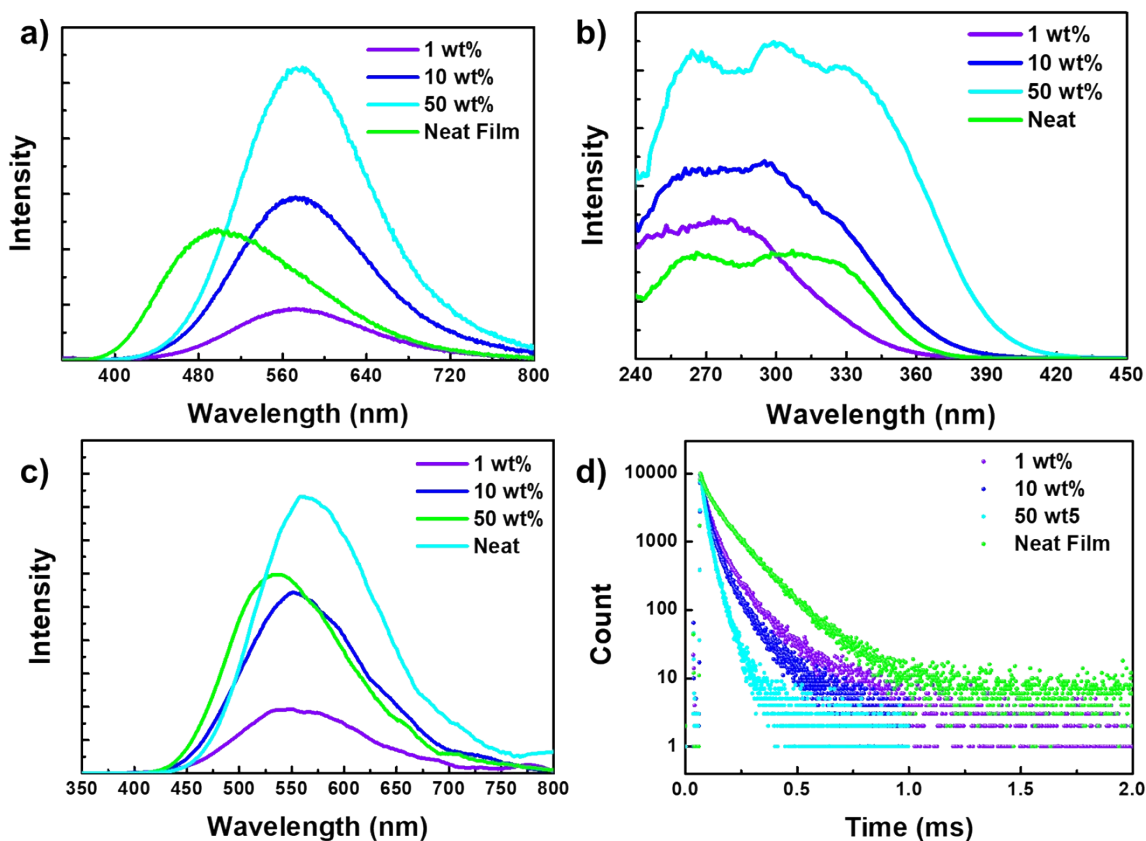

**Figure S36.** (a, b) steady-state PL and corresponding excitation spectra for **BNS** doped film in PPMA with different loading concentrations and corresponding neat film ( $\lambda_{\text{ex}} = 330$  nm respectively). (c) Time gated /Delayed spectra [50  $\mu\text{s}$  delay] PL spectra and (d) phosphorescence decay under vacuum atmosphere at 298 K for **BNS** doped film in PPMA with different loading concentrations and corresponding neat film ( $\lambda_{\text{ex}} = 330$  nm,  $\lambda_{\text{em}} = 550, 555, 565$  for doped film 1wt%, 10wt% and 50wt% respectively and 535 for neat film).

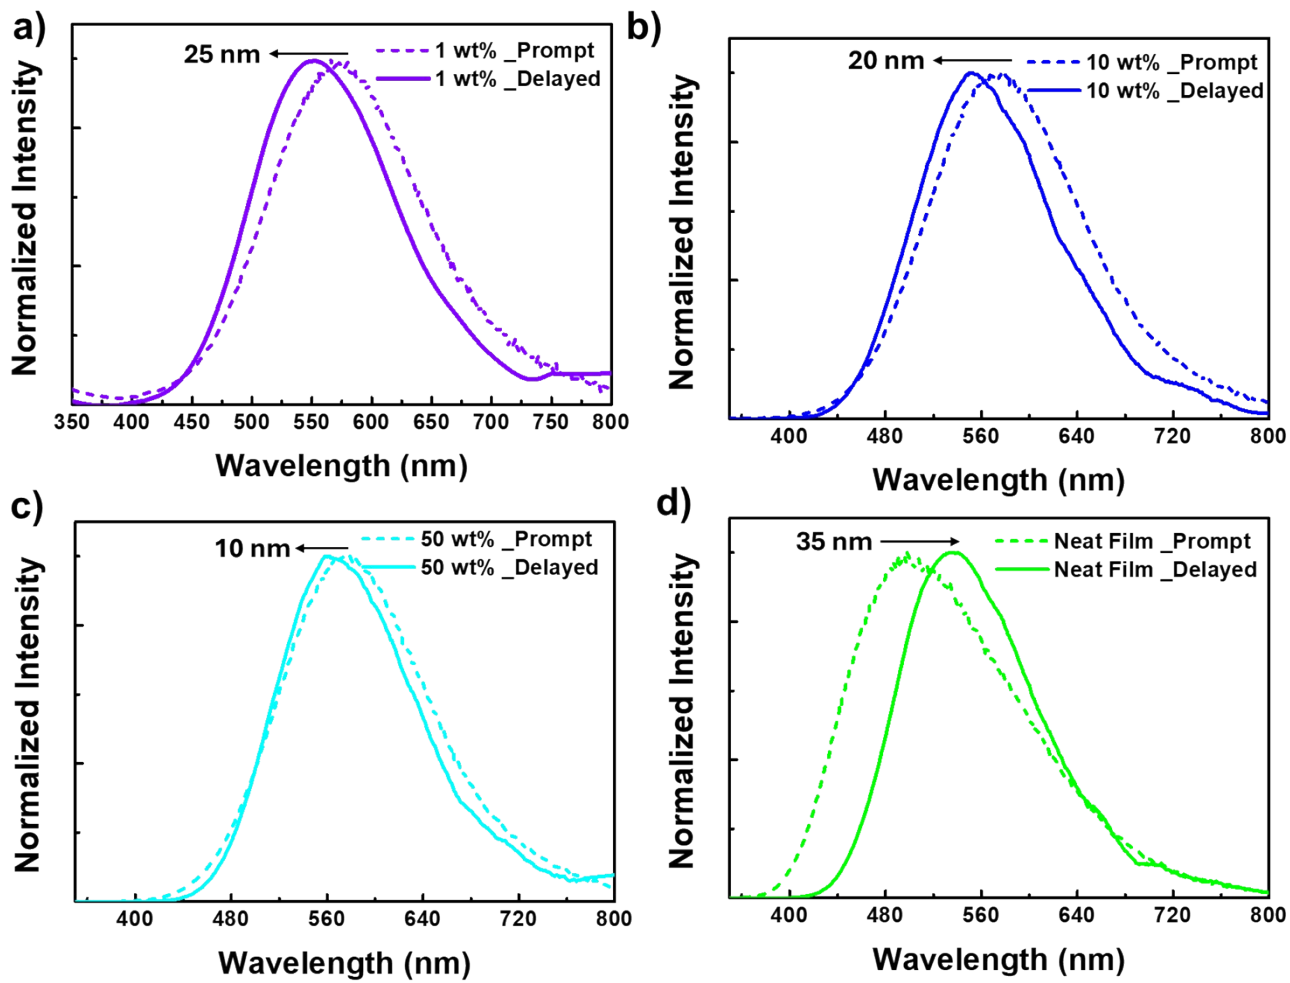

**Figure S37.** Prompt and time-gated/delayed [50  $\mu$ s delay] PL spectra for **BNS** doped film in PMMA with doping concentration (a) 1wt%, (b) 10wt%, (c) 50wt% and as neat film at  $\lambda_{\text{ex}} = 330$  nm

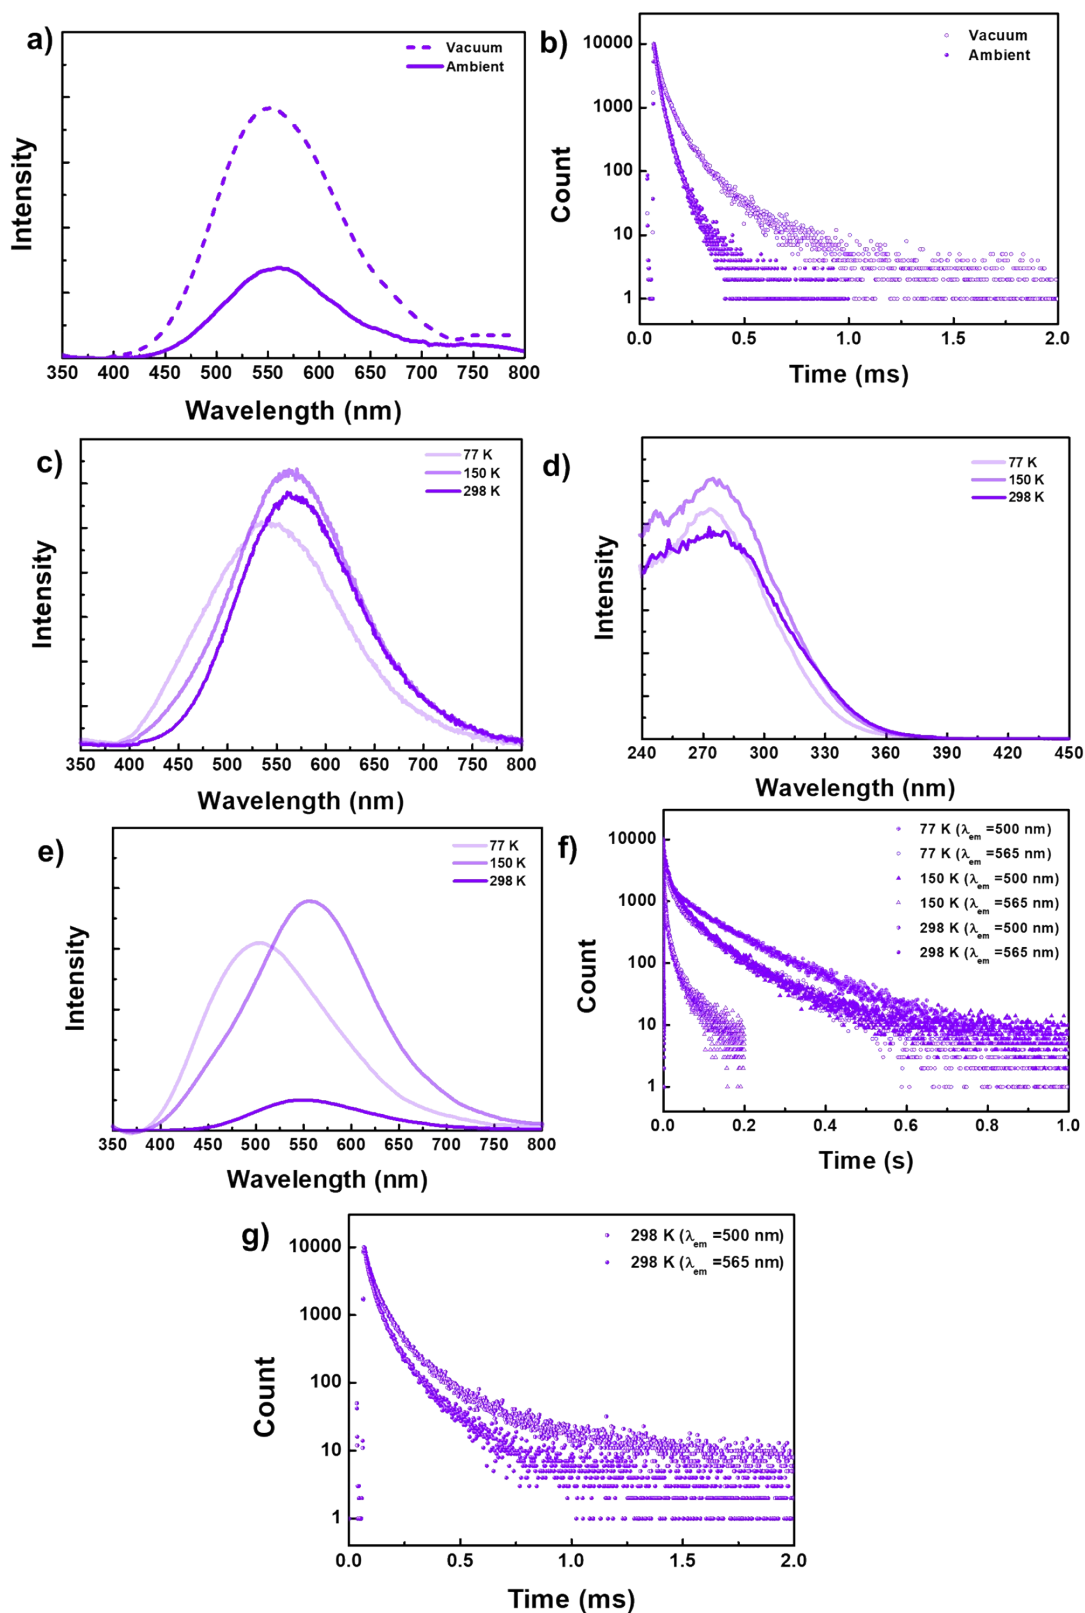

**Figure S38.** (a) Time-gated/delayed [50 $\mu$ s delay] PL spectra and (b) delayed fluorescence decay [ $\lambda_{em} = 540$  nm] for **BNS** doped in PMMA (1wt%) at 298 K under vacuum (absence of O<sub>2</sub>) and ambient (presence of O<sub>2</sub>) at  $\lambda_{ex} = 330$  nm (c) Steady-state PL spectra, (d) excitation spectra, (e) time-gated/delayed [50 $\mu$ s delay] PL spectra and (f) delayed fluorescence decay for **BNS** doped in PMMA (1wt%) at  $\lambda_{ex} = 330$  nm and  $\lambda_{em} = 540$  nm under vacuum at different temperature

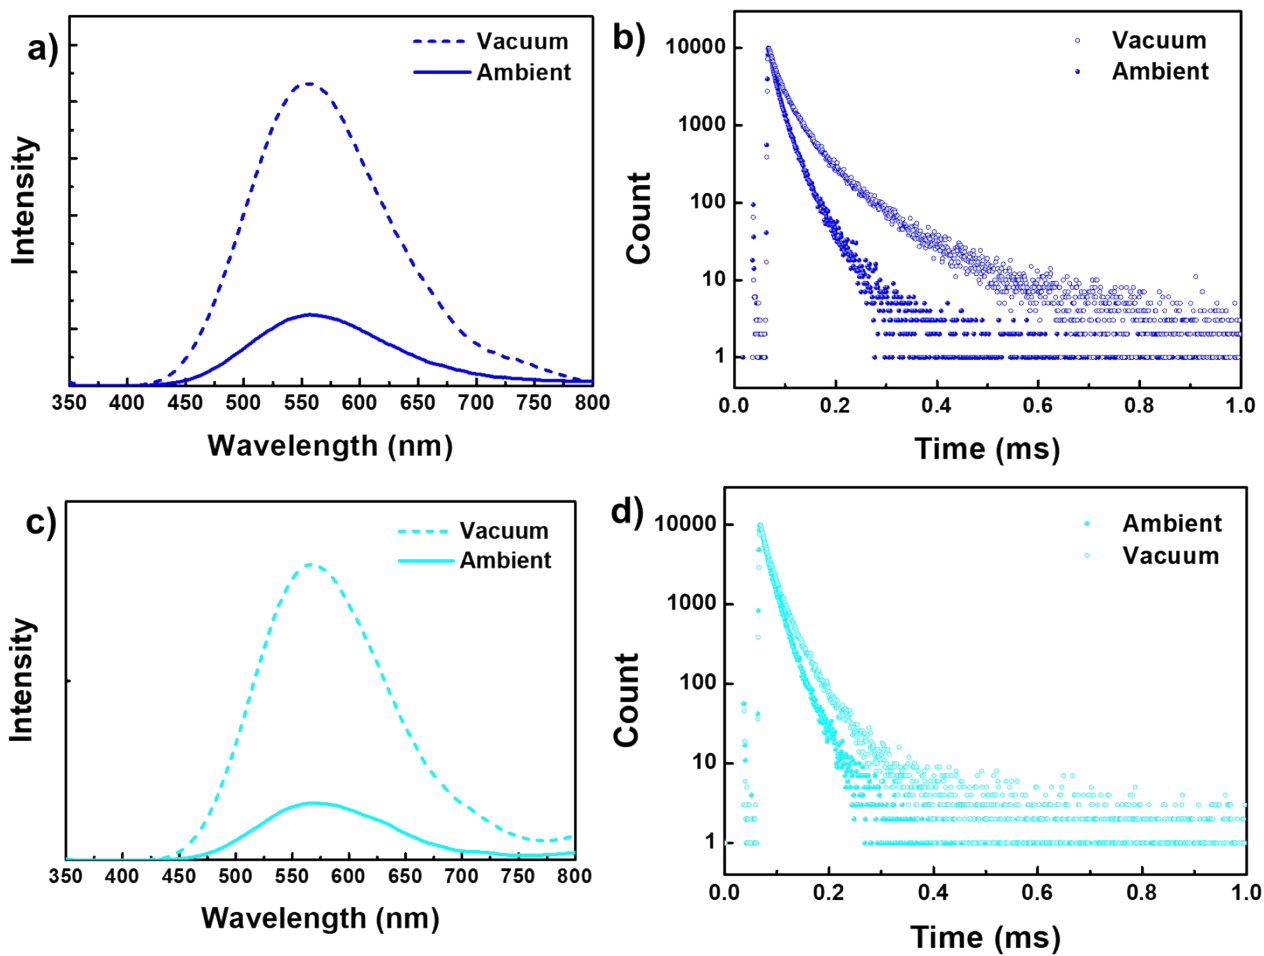

**Figure S39.** (a, c) Time-gated/delayed [50 $\mu$ s delay] PL spectra and (b, d) phosphorescence decay [ $\lambda_{em} = 540$  nm] for BNS doped in PMMA with doping concentrations (a,b)10 wt% (c,d) 50 wt% at 298 K under vacuum (absence of O<sub>2</sub>) and ambient (presence of O<sub>2</sub>) at  $\lambda_{ex} = 330$  nm.

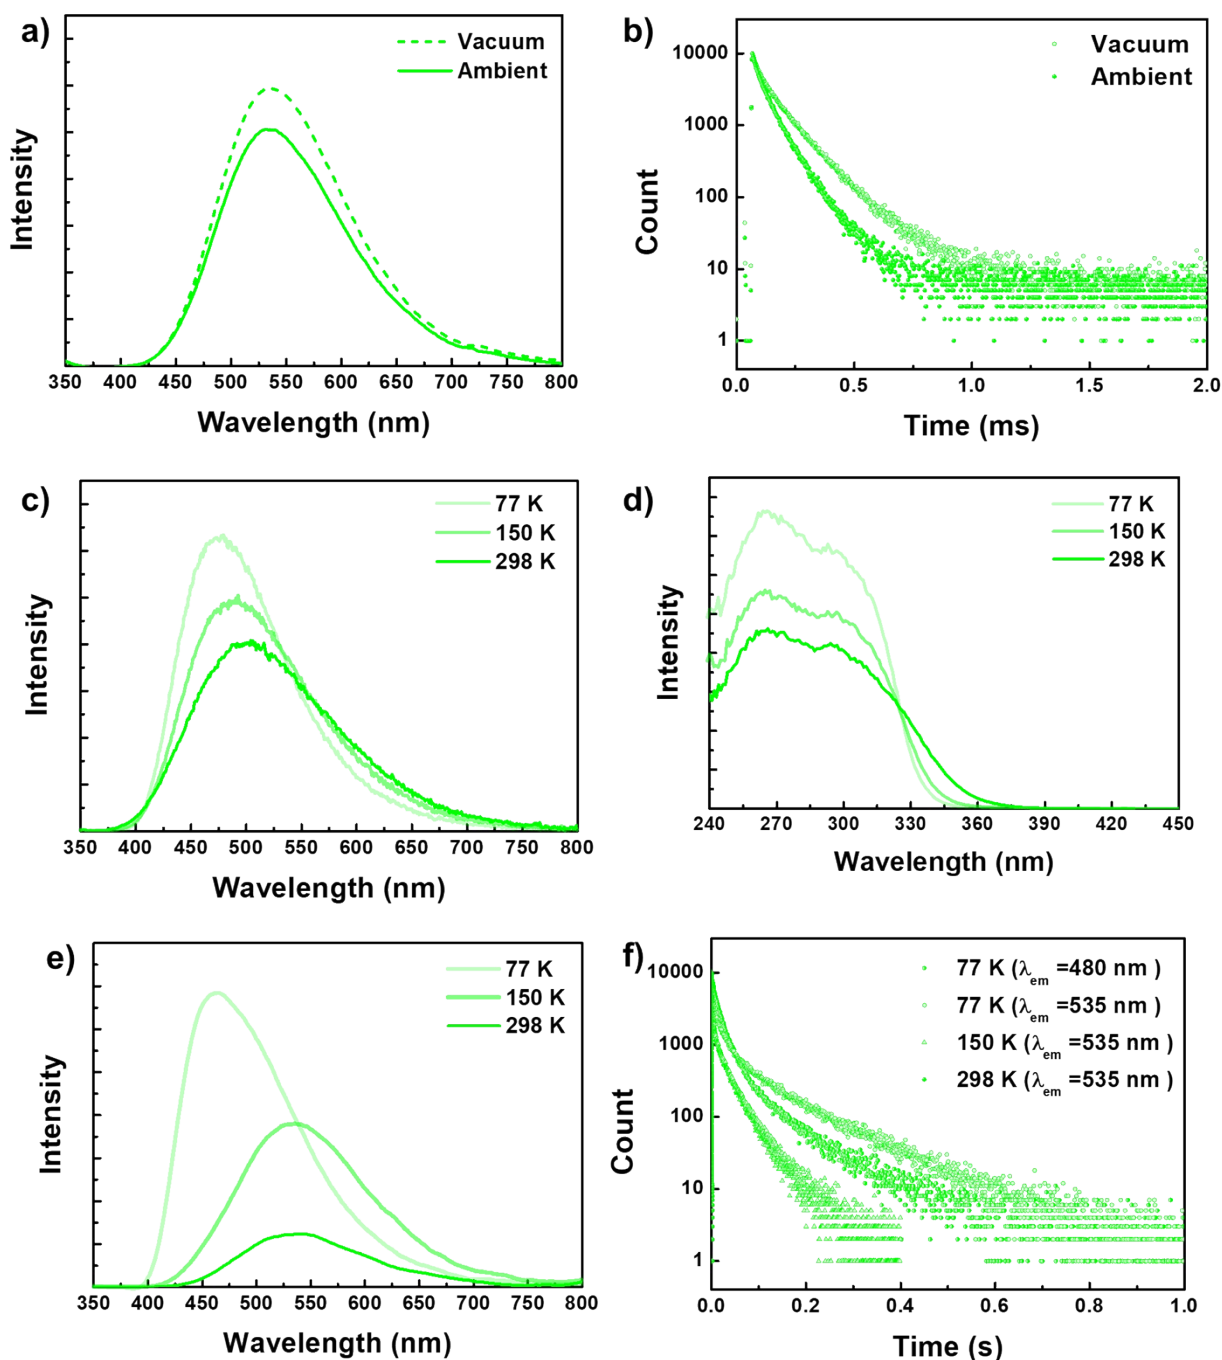

**Figure S40.** (a) Time-gated/delayed [50 $\mu$ s delay] PL spectra and (b) delayed fluorescence decay [ $\lambda_{em} = 540$  nm] for neat film of **BNS** at 298 K under vacuum (absence of O<sub>2</sub>) and ambient (presence of O<sub>2</sub>) at  $\lambda_{ex} = 330$  nm, (c) Steady-state PL spectra, (d) excitation spectra, (e) time-gated/delayed [50 $\mu$ s delay] PL spectra, and (f) phosphorescence decay for neat film of **BNS** at  $\lambda_{ex} = 330$  nm and  $\lambda_{em} = 540$  nm under vacuum at different temperature.



**Table S14** Fluorescence (FI) and Delayed fluorescence (DF) lifetime for **BNS** doped in PPMA with different loading concentrations and corresponding neat film at 298 K under vacuum (absence of O<sub>2</sub>) and ambient (presence of O<sub>2</sub>).

|       |     | Fluorescence lifetime         |                               |                            |                            | Phosphorescence lifetime      |                            |                             | PLQY |
|-------|-----|-------------------------------|-------------------------------|----------------------------|----------------------------|-------------------------------|----------------------------|-----------------------------|------|
|       |     | $\lambda_{\text{ex}}$<br>(nm) | $\lambda_{\text{em}}$<br>(nm) | $\tau_1$ (A <sub>1</sub> ) | $\tau_2$ (A <sub>2</sub> ) | $\lambda_{\text{em}}$<br>(nm) | $\tau_1$ (A <sub>1</sub> ) | $\tau_2$ (A <sub>2</sub> )  |      |
| 1wt%  | Vac | 310                           | 575                           | 12.79 ns<br>(100%)         |                            | 550                           | 32.65 $\mu$ s<br>(63.55 %) | 132.54 $\mu$ s<br>(36.45 %) | 0.41 |
|       | oxy | 310                           | 575                           | 12.26 ns<br>(100%)         |                            | 550                           | 18.05 $\mu$ s<br>(66.55 %) | 52.90 $\mu$ s<br>(33.45 %)  |      |
| 10wt% | Vac | 310                           | 575                           | 12.63 ns<br>(100%)         |                            | 555                           | 24.57 $\mu$ s<br>(61.58 %) | 88.39 $\mu$ s<br>(38.42 %)  | 0.54 |
|       | oxy | 310                           | 575                           | 12.62 ns<br>(100%)         |                            | 555                           | 13.43 $\mu$ s<br>(59.29 %) | 36.36 $\mu$ s<br>(40.71 %)  |      |
| 50wt% | Vac | 310                           | 575                           | 12.78 ns<br>(100%)         |                            | 565                           | 16.01 $\mu$ s<br>(64.97 %) | 43.37 $\mu$ s<br>(35.03 %)  | 0.87 |
|       | oxy | 310                           | 575                           | 12.67 ns<br>(100%)         |                            | 565                           | 15.65 $\mu$ s<br>(70.33 %) | 36.30 $\mu$ s<br>(29.67 %)  |      |
| Neat  | Vac | 310                           | 500                           | 9.04 ns<br>(100%)          |                            | 535                           | 52.33 $\mu$ s<br>(29.63 %) | 133.04 $\mu$ s<br>(70.37 %) | 0.60 |
|       | oxy | 310                           | 500                           | 8.71 ns<br>(100%)          |                            | 535                           | 44.97 $\mu$ s<br>(47.69 %) | 99.13 $\mu$ s<br>(52.31 %)  |      |

**Table S15.** Fluorescence (FI) and Delayed fluorescence (DF) lifetime for **BNO** doped in PPMA (1wt%) and corresponding neat film at different temperatures under vacuum (absence of O<sub>2</sub>).

| Temperature      | Fluorescence lifetime      |                            |                            |                            | Phosphorescence lifetime   |                            |                             |
|------------------|----------------------------|----------------------------|----------------------------|----------------------------|----------------------------|----------------------------|-----------------------------|
|                  | $\lambda_{\text{ex}}$ (nm) | $\lambda_{\text{em}}$ (nm) | $\tau_1$ (A <sub>1</sub> ) | $\tau_2$ (A <sub>2</sub> ) | $\lambda_{\text{em}}$ (nm) | $\tau_1$ (A <sub>1</sub> ) | $\tau_2$ (A <sub>2</sub> )  |
| <b>1wt%</b>      |                            |                            |                            |                            |                            |                            |                             |
| 77 K             | 310                        | 540                        | 15.28 ns<br>(100)<br>-     | -                          | 500                        | 23.44 ms<br>(20.17 %)      | 131.10 ms<br>(79.83 %)      |
|                  |                            |                            |                            |                            | 565                        | 17.10 ms<br>(32.99 %)      | 108.89 ms<br>(67.01 %)      |
|                  |                            |                            |                            |                            | 620                        | 14.37 ms<br>(36.75 %)      | 100.11 ms<br>(63.25 %)      |
| 150 K            | 310                        | 567                        | 13.42 ns<br>(100 %)        | -                          | 550                        | 4.06 ms<br>(45.18%)        | 27.32 ms<br>(54.82%)        |
|                  |                            |                            |                            |                            | 480                        | 19.67 ms<br>(37.00 %)      | 94.95 ms<br>(63.0 %)        |
| 298 K            | 310                        | 575                        | 12.79 ns<br>(100%)         |                            | 550                        | 32.65 $\mu$ s<br>(63.55 %) | 132.54 $\mu$ s<br>(36.45 %) |
|                  |                            |                            |                            |                            | 500                        | 48.83 $\mu$ s<br>(62.40 %) | 194.53 $\mu$ s<br>(37.60 %) |
|                  |                            |                            |                            |                            | 600                        | 35.73 $\mu$ s<br>(62.87 %) | 131.16 $\mu$ s<br>(37.13 %) |
| <b>Neat film</b> |                            |                            |                            |                            |                            |                            |                             |
| 77 K             | 310                        | 475                        | 9.22 ns<br>(100)           | -                          | 462                        | 18.24 ms<br>(64.62 %)      | 93.55 ms<br>(35.38 %)       |
|                  |                            |                            |                            |                            | 520                        | 20.23 ms<br>(34.63)        | 124.92 ms<br>(65.37)        |
| 150 K            | 310                        | 488                        | 9.08 ns (100 %)            | -                          | 460                        | 7.25 ms<br>(21.01 %)       | 38.57 ms<br>(78.99)         |
|                  |                            |                            |                            |                            | 540                        | 11.94 ms<br>(26.71%)       | 41.63 ms<br>(73.29)         |
|                  |                            |                            |                            |                            | 585                        | 3.40 ms<br>(32.56%)        | 29.99 ms<br>(67.44)         |
| 298 K            | 310                        | 500                        | 9.04 ns<br>(100%)          |                            | 535                        | 52.33 $\mu$ s<br>(29.63 %) | 133.04 $\mu$ s<br>(70.37 %) |
|                  |                            |                            |                            |                            | 580                        | 28.84 $\mu$ s<br>(36.21 %) | 86.37 $\mu$ s<br>(63.79 %)  |

## 5.5 Excited State Theoretical Studies

**Table S16.** The bond parameters for **BNS** and **BNO** obtained from the ground state ( $S_0$ ) and excited state ( $S_1$ ,  $T_1$ ,  $T_5$ ,  $T_6$ ) optimized geometry using a DFT or TD-DFT calculation with B3LYP/6-31G(d) level of theory.

| State      | B-N bond length (Å) | Dihedral angle (deg) | The angle between the xylyl plane(deg) | The angle between the phenyl plane in phenoxazine/phenothiazine (deg) | Dipol moment |
|------------|---------------------|----------------------|----------------------------------------|-----------------------------------------------------------------------|--------------|
| <b>BNO</b> |                     |                      |                                        |                                                                       |              |
| S0         | 1.444               | 23.92                | 84.59                                  | 146.59                                                                | 0.82         |
| S1         | 1.619               | 69.42                | 72.01                                  | 174.51                                                                | 6.56         |
| T1         | 1.605               | 60.06                | 73.35                                  | 178.34                                                                | 7.0          |
| T5         | 1.485               | 42.97                | 71.21                                  | 161.45                                                                | 1.62         |
| <b>BNO</b> |                     |                      |                                        |                                                                       |              |
| S0         | 1.446               | 18.96                | 81.51                                  | 135.86                                                                | 1.30         |
| S1         | 1.630               | 68.94                | 70.15                                  | 172.92                                                                | 3.43         |
| T1         | 1.617               | 62.80                | 71.16                                  | 178.08                                                                | 7.37         |
| T5         | 1.498               | 43.70                | 78.27                                  | 151.66                                                                | 1.78         |
| T6         | 1.512               | 51.38                | 81.15                                  | 153.80                                                                | 1.69         |

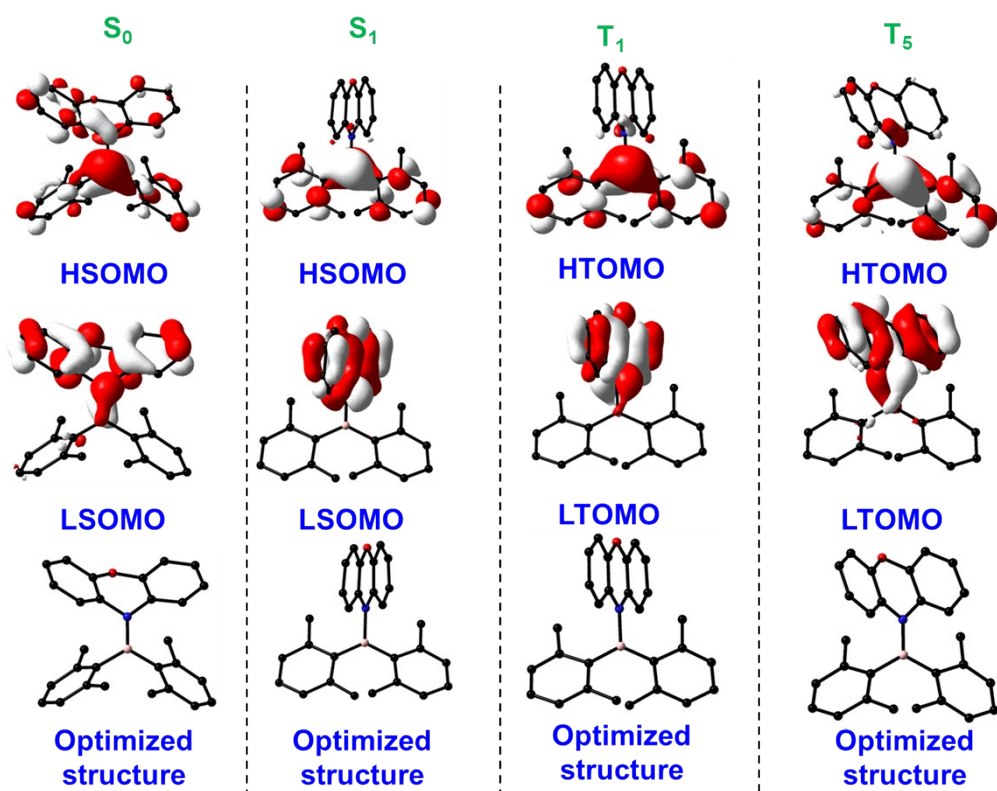

**Figure S41.** Optimized geometry and MOs for  $S_0$ ,  $S_1$ ,  $T_1$ , and  $T_5$  for **BNO** using DFT and TD-DFT calculation with B3LYP/6-31G(d) level of theory. (LSOMO: Lowest occupied molecular orbital in singlet state and HSOMO: Lowest occupied molecular orbital in singlet state ).

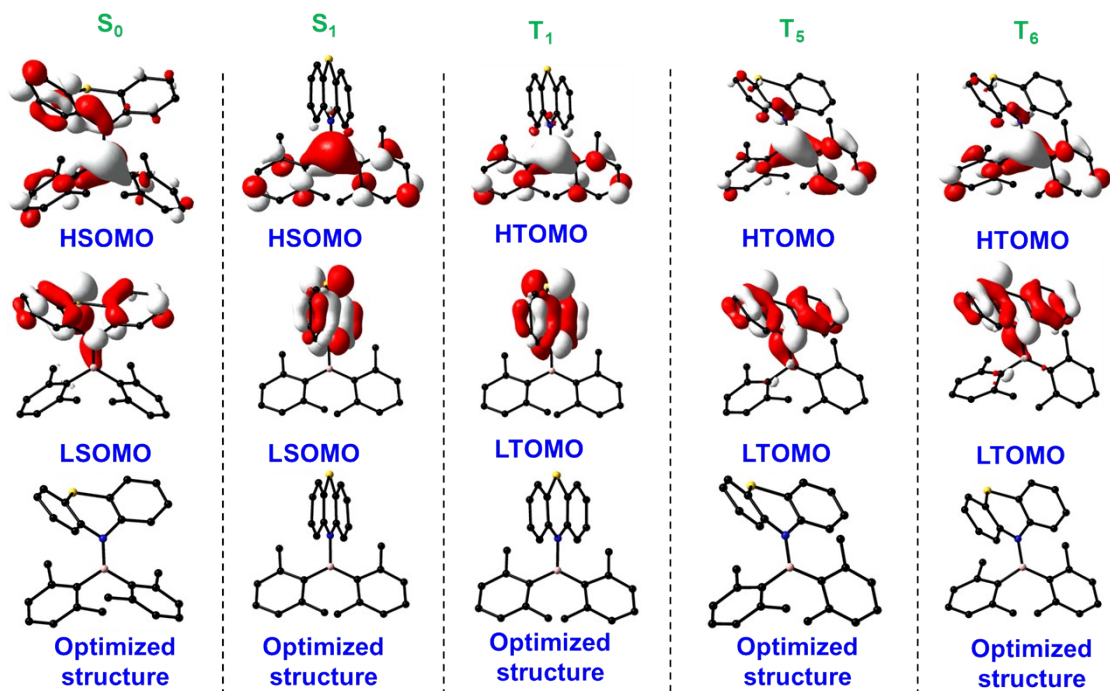

**Figure S42.** Optimized geometry and MOs for  $S_0$ ,  $S_1$ ,  $T_1$ ,  $T_5$ , and  $T_6$  for **BNS** using DFT and TD-DFT calculation with B3LYP/6-31G(d) level of theory. (LTOMO: Lowest occupied molecular orbital in triplet state and HTOMO: Lowest occupied molecular orbital in triplet state ).

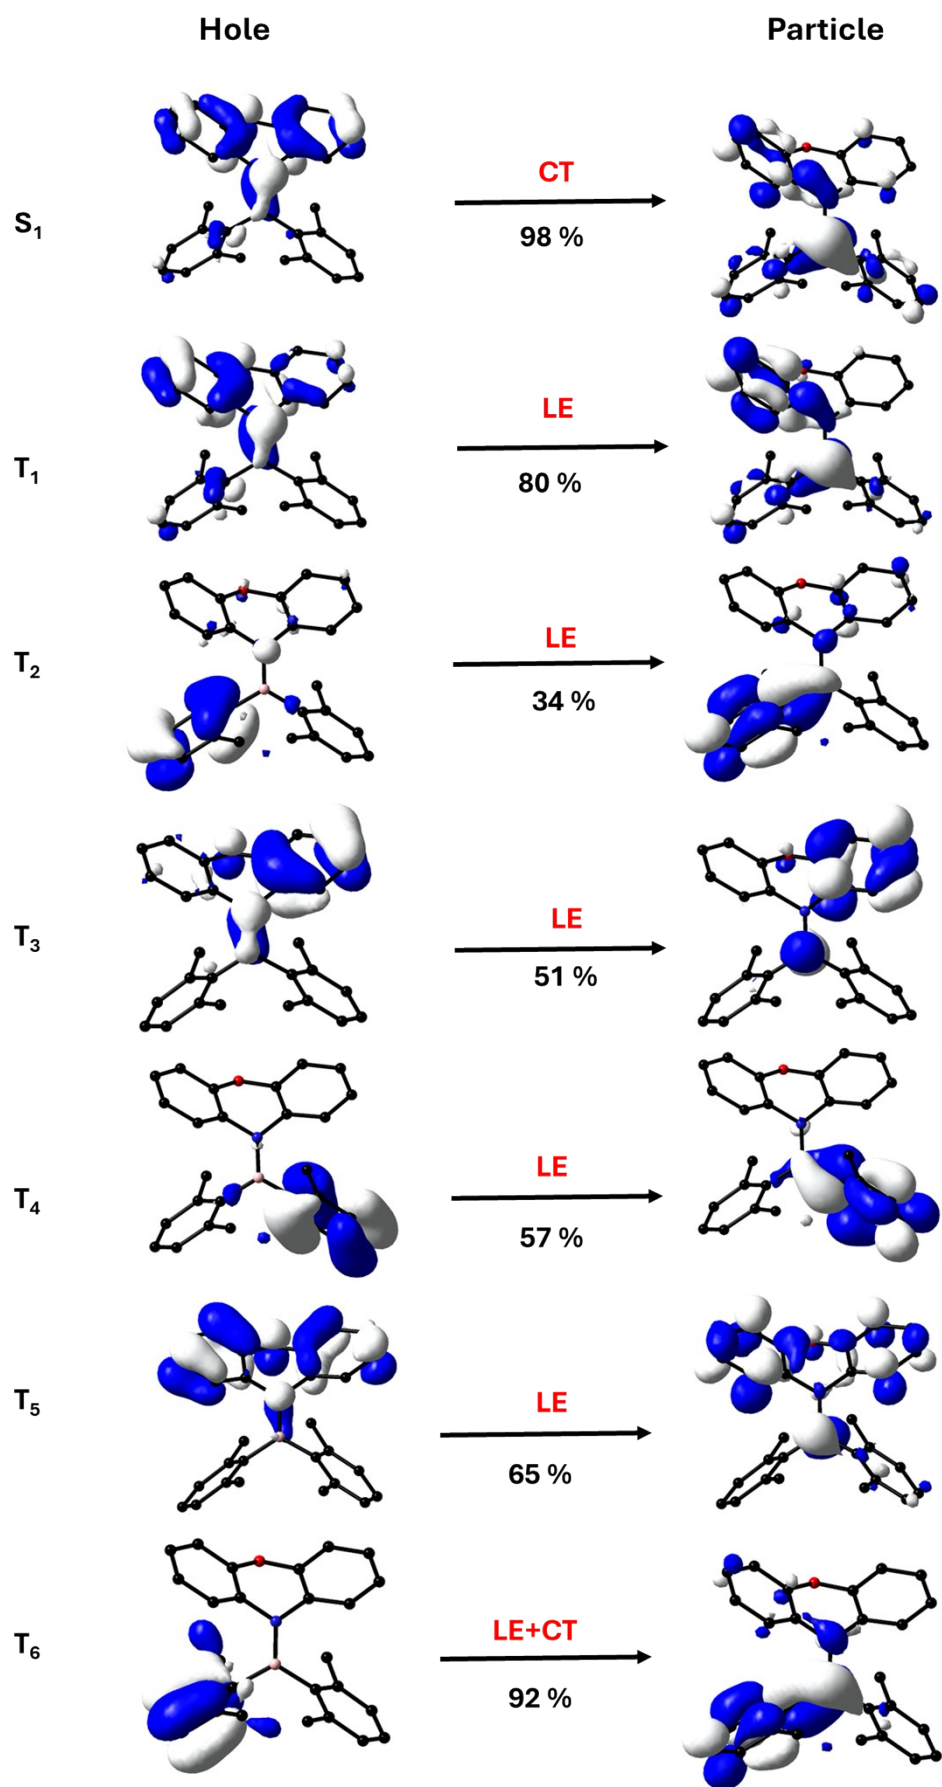

**Figure S43.** Natural transition orbitals (NTO) corresponding to the various states ( $S_1, T_{1-6}$ ) of **BNO** calculated from TD-DFT calculation using B3LYP and 6-31G (d) level of theory

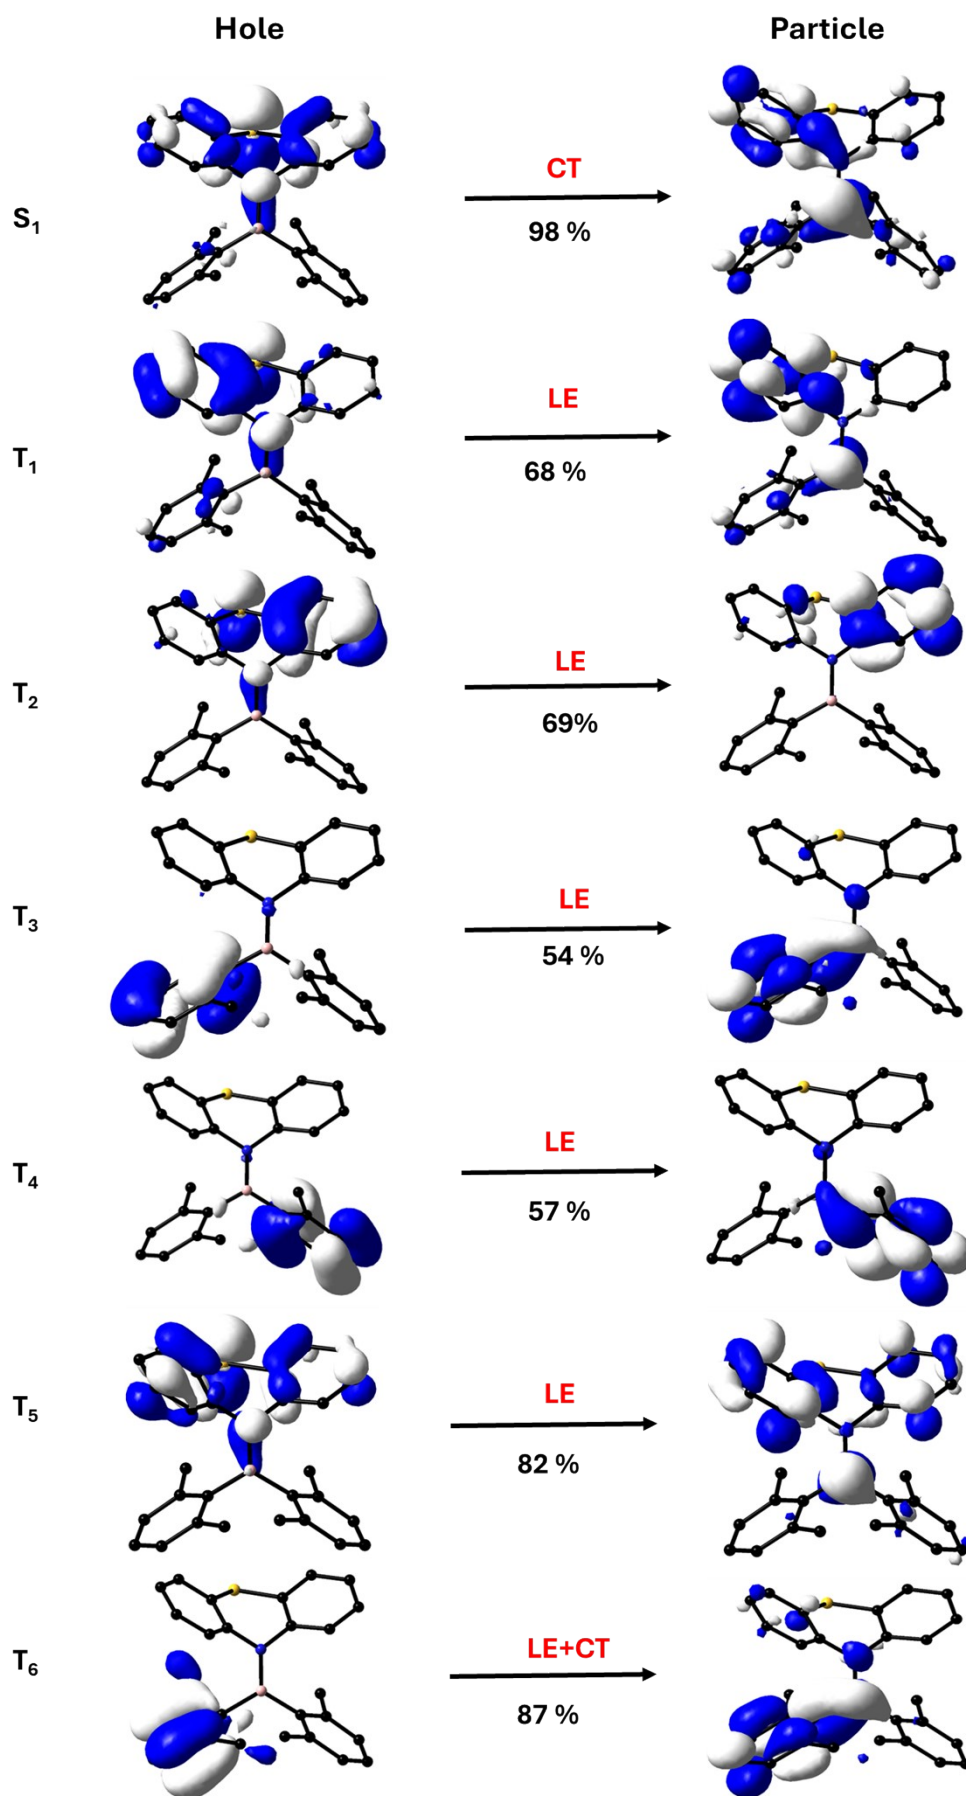

**Figure S44.** Natural transition orbitals (NTO) corresponding to the various states ( $S_1$ ,  $T_{1-6}$ ) of BNS calculated from TD-DFT calculation using B3LYP and 6-31G (d) level of theory

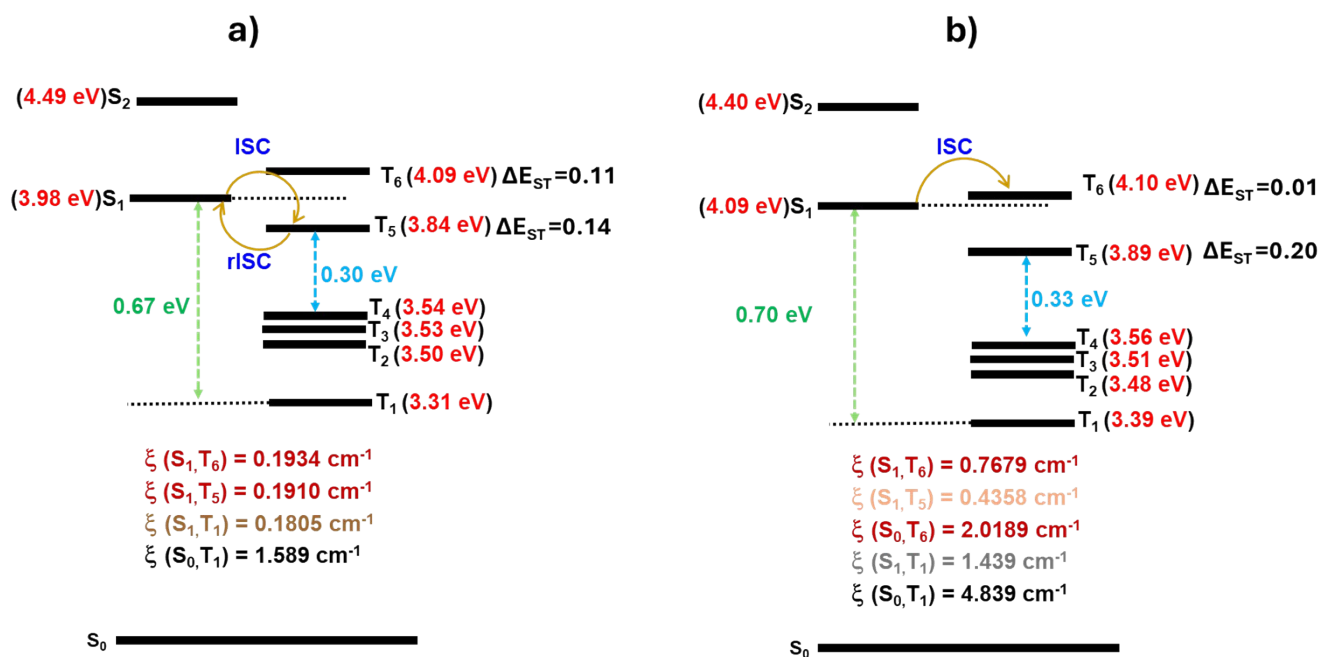

**Figure S45.** Energy level diagram showing singlet to triplet transitions (ISC/rISC), singlet-triplet energy gap, spin-orbital coupling constant ( $\xi_{\text{SOC}}$ ), and for (a) **BNO** (b) **BNS**. Energy levels in the diagram are not up-to-scale, golden curved arrows are the most possible path according to the energy difference and spin-orbit coupling ( $\xi_{\text{SOC}}$ ), ISC - intersystem crossing and rISC is reverse intersystem crossing.

**Table S17.** Energy onset values and singlet-triplet energy, calculated from the experimental prompt fluorescence (298K) and phosphorescence spectra at 77 K (for BNO) or 298 K (for BNS).

| Compound           | Onset <sub>E<sub>S</sub></sub> (Exp) [eV] | Onset <sub>E<sub>T</sub></sub> (Exp) [eV] | ΔE <sub>ST</sub> (Exp) [eV] | ΔE <sub>S1T1</sub> (DFT) [eV] | ΔE <sub>S1Tn</sub> (DFT) [eV] |
|--------------------|-------------------------------------------|-------------------------------------------|-----------------------------|-------------------------------|-------------------------------|
| <b>BNO</b> (1wt%)  | 2.70                                      | 2.65                                      | 0.05                        | 0.67                          | 0.11 (T <sub>6</sub> )        |
| <b>BNO</b> (Solid) | 2.69                                      | 2.80                                      | 0.11                        |                               | 0.14 (T <sub>5</sub> )        |
| <b>BNS</b> (1wt%)  | 2.75                                      | 2.82                                      | 0.07                        | 0.70                          | 0.01 (T <sub>6</sub> )        |
| <b>BNS</b> (Solid) | 3.02                                      | 2.94                                      | 0.08                        |                               | 0.20 (T <sub>5</sub> )        |

EXP= Experimentally determined, DFT- Determined via Density functional theory

The experimental  $\Delta E_{\text{ST}}$  values for BNO and BNS were determined from the spectral onset values of fluorescence spectra at 298 K ( $\text{onset}E_{\text{S}}$ ) and phosphorescence spectra at 77 K or 298 K ( $\text{onset}E_{\text{T}}$ ). The results, provided in the table below, indicate that the  $\Delta E_{\text{ST}}$  values are sufficiently low to enable efficient spin crossover, resulting in significant delayed luminescence (DF/PH). Furthermore, these experimental values align more closely with the theoretically calculated  $\Delta E_{\text{S1Tn}}$  values than with  $\Delta E_{\text{S1T1}}$ , providing additional evidence for the involvement of higher triplet states.

**Table S18.** Summary of TD-DFT computed triplet vertical transitions involved in **BNO**.

| Transitions           | E/eV   | $\lambda$ /nm | f      | Dominant transitions (%)                                                  | $\Delta E_{ST}$ |
|-----------------------|--------|---------------|--------|---------------------------------------------------------------------------|-----------------|
| $S_0 \rightarrow T_1$ | 3.3116 | 374.39        | 0.0000 | HOMO $\rightarrow$ LUMO (32.45)<br>HOMO-2 $\rightarrow$ LUMO (2.86)       | 0.6662          |
| $S_0 \rightarrow T_2$ | 3.5046 | 353.77        | 0.0000 | HOMO $\rightarrow$ LUMO+2 (12.87)<br>HOMO-1 $\rightarrow$ LUMO+6 (4.02)   | 0.4732          |
| $S_0 \rightarrow T_3$ | 3.5308 | 351.15        | 0.0000 | HOMO $\rightarrow$ LUMO+2 (9.23)<br>HOMO-5 $\rightarrow$ LUMO (3.68)      | 0.4470          |
| $S_0 \rightarrow T_4$ | 3.5404 | 350.19        | 0.0000 | HOMO-4 $\rightarrow$ LUMO (7.82)<br>HOMO-4 $\rightarrow$ LUMO+1 (6.14)    | 0.4374          |
| $S_0 \rightarrow T_5$ | 3.8455 | 322.42        | 0.0000 | HOMO $\rightarrow$ LUMO (10.82)<br>HOMO-2 $\rightarrow$ LUMO+1 (1.59)     | 0.1323          |
| $S_0 \rightarrow T_6$ | 4.0925 | 302.95        | 0.0000 | HOMO-1 $\rightarrow$ LUMO (32.52)<br>HOMO-1 $\rightarrow$ LUMO+1 0.(7.26) | -0.1147         |

**Table S19.** Summary of TD-DFT computed triplet vertical transitions involved in **BNS**.

| Transitions           | E/eV   | $\lambda$ /nm | f      | Dominant transitions (%)                                                 | $\Delta E_{ST}$ |
|-----------------------|--------|---------------|--------|--------------------------------------------------------------------------|-----------------|
| $S_0 \rightarrow T_1$ | 3.3871 | 366.05        | 0.0000 | HOMO $\rightarrow$ LUMO (20.36)                                          | 0.6151          |
| $S_0 \rightarrow T_2$ | 3.4762 | 356.67        | 0.0000 | HOMO $\rightarrow$ LUMO+2 (24.68)                                        | 0.5821          |
| $S_0 \rightarrow T_3$ | 3.5092 | 353.31        | 0.0000 | HOMO-1 $\rightarrow$ LUMO+7 (8.68)<br>HOMO-2 $\rightarrow$ LUMO+1 (5.97) | 0.5306          |
| $S_0 \rightarrow T_4$ | 3.5607 | 348.20        | 0.0000 | HOMO-4 $\rightarrow$ LUMO+4 (9.39)<br>HOMO-3 $\rightarrow$ LUMO+6 (6.72) | 0.1988          |
| $S_0 \rightarrow T_5$ | 3.8925 | 318.52        | 0.0000 | HOMO $\rightarrow$ LUMO (20.17)<br>HOMO $\rightarrow$ LUMO+1 (15.00)     | -0.0138         |
| $S_0 \rightarrow T_6$ | 4.1051 | 302.03        | 0.0000 | HOMO-1 $\rightarrow$ LUMO (23.71)                                        | -0.049          |
| $S_0 \rightarrow T_6$ | 4.1411 | 299.40        | 0.0000 | HOMO-1 $\rightarrow$ LUMO+1 (15.48)                                      | 0.7042          |



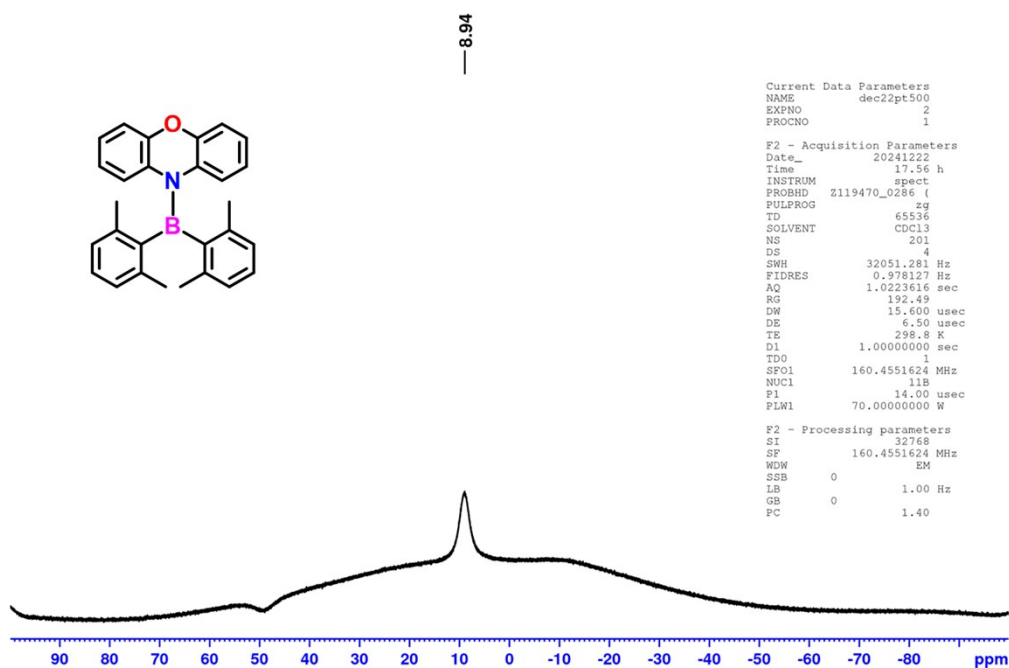

**Figure S46:**  $^{11}\text{B}$  NMR of **BNO** in  $\text{CDCl}_3$  at  $25^\circ\text{C}$  after adding an excess tetrabutylammonium fluoride TBAF. ( $^{11}\text{B}$  NMR before adding TBAF is in S3).

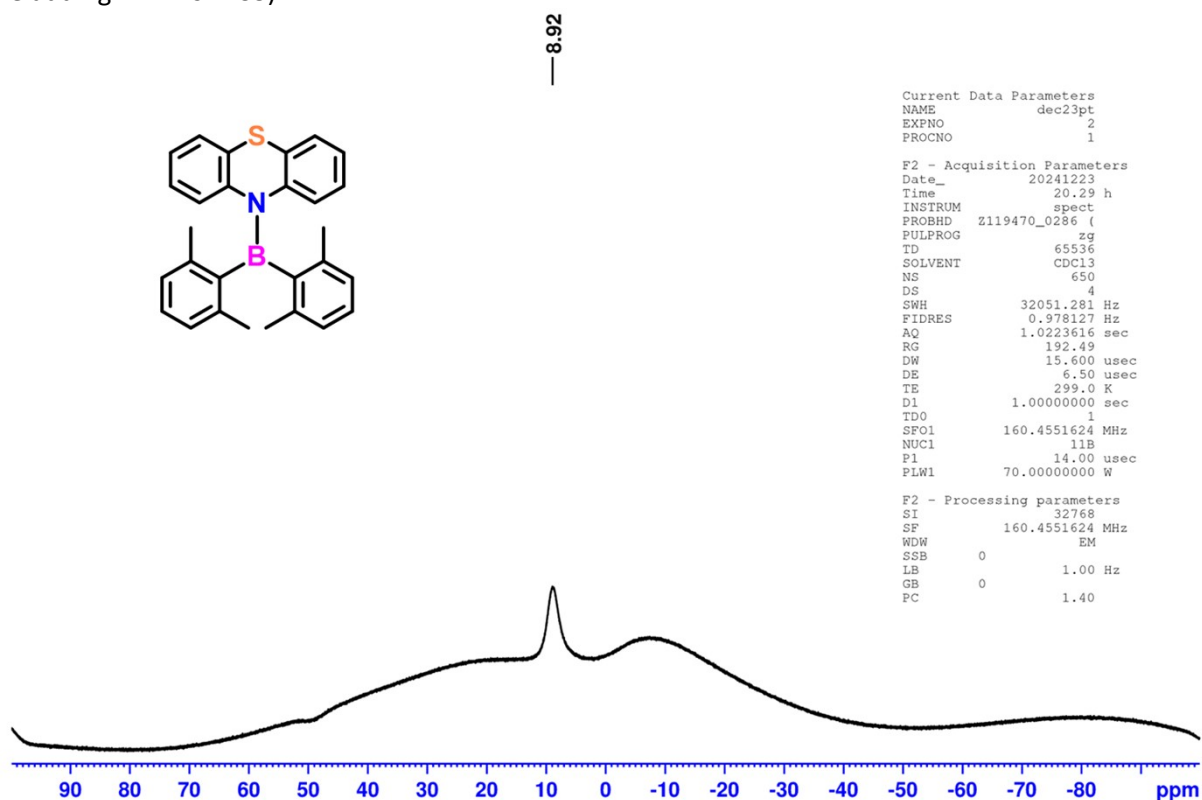

**Figure S47:**  $^{11}\text{B}$  NMR of **BNS** in  $\text{CDCl}_3$  at  $25^\circ\text{C}$  after adding an excess tetrabutylammonium fluoride (TBAF).  $^{11}\text{B}$  NMR before adding TBAF is in S7.

**Table S20.** Coordinates of **BNO** after single-point energy calculations.

| Center<br>Number | Atomic<br>Number | Atomic<br>Type | Coordinates (Angstroms) |           |           |
|------------------|------------------|----------------|-------------------------|-----------|-----------|
|                  |                  |                | X                       | Y         | Z         |
| 1                | 6                | 0              | -2.453196               | -0.023394 | -2.330780 |
| 2                | 1                | 0              | -1.559222               | 0.324536  | -2.286001 |
| 3                | 1                | 0              | -2.481473               | -0.753517 | -2.952887 |
| 4                | 1                | 0              | -3.051260               | 0.668978  | -2.621989 |
| 5                | 8                | 0              | 3.081225                | -1.275978 | -0.771115 |
| 6                | 6                | 0              | -0.336147               | 4.486402  | -1.105579 |
| 7                | 1                | 0              | -0.271577               | 5.381309  | -1.349760 |
| 8                | 6                | 0              | -1.050591               | 4.122204  | 0.008357  |
| 9                | 1                | 0              | -1.469838               | 4.779220  | 0.516100  |
| 10               | 6                | 0              | -1.160750               | 2.788718  | 0.392658  |
| 11               | 6                | 0              | -0.480073               | 1.789582  | -0.332181 |
| 12               | 5                | 0              | -0.588912               | 0.246870  | 0.035057  |
| 13               | 7                | 0              | 0.622506                | -0.485114 | 0.259319  |
| 14               | 6                | 0              | 1.827341                | 0.173882  | 0.659404  |
| 15               | 6                | 0              | 1.834659                | 1.180224  | 1.616296  |
| 16               | 1                | 0              | 1.035206                | 1.448596  | 2.008189  |
| 17               | 6                | 0              | 3.019783                | 1.787687  | 1.992502  |
| 18               | 1                | 0              | 3.010805                | 2.469183  | 2.625277  |
| 19               | 6                | 0              | 4.212068                | 1.386361  | 1.433028  |
| 20               | 1                | 0              | 5.004603                | 1.805903  | 1.679603  |
| 21               | 6                | 0              | -4.578287               | -1.530004 | 0.390434  |
| 22               | 1                | 0              | -5.430821               | -1.891804 | 0.472141  |
| 23               | 6                | 0              | -3.750510               | -1.471870 | 1.479120  |
| 24               | 1                | 0              | -4.051999               | -1.787540 | 2.300384  |
| 25               | 6                | 0              | -2.463510               | -0.947640 | 1.376767  |
| 26               | 6                | 0              | -1.607815               | -0.944752 | 2.615621  |
| 27               | 1                | 0              | -0.751612               | -0.560359 | 2.412206  |
| 28               | 1                | 0              | -2.036770               | -0.426189 | 3.299956  |
| 29               | 1                | 0              | -1.488284               | -1.845947 | 2.924236  |
| 30               | 6                | 0              | -2.006509               | -0.450773 | 0.133348  |
| 31               | 6                | 0              | -4.144455               | -1.050950 | -0.824379 |
| 32               | 1                | 0              | -4.712076               | -1.091503 | -1.559916 |
| 33               | 6                | 0              | 0.280095                | 3.522602  | -1.852698 |
| 34               | 1                | 0              | 0.728638                | 3.768715  | -2.629350 |
| 35               | 6                | 0              | 0.253281                | 2.176205  | -1.478999 |
| 36               | 6                | 0              | 1.006304                | 1.201435  | -2.344303 |
| 37               | 1                | 0              | 0.911825                | 0.315891  | -1.985695 |
| 38               | 1                | 0              | 0.651719                | 1.224915  | -3.236129 |
| 39               | 1                | 0              | 1.935546                | 1.441618  | -2.363040 |
| 40               | 6                | 0              | -2.003083               | 2.460002  | 1.589730  |
| 41               | 1                | 0              | -1.990043               | 1.511572  | 1.739404  |
| 42               | 1                | 0              | -1.652580               | 2.910512  | 2.361371  |
| 43               | 1                | 0              | -2.906009               | 2.746603  | 1.434117  |
| 44               | 6                | 0              | 4.233918                | 0.364678  | 0.508767  |
| 45               | 1                | 0              | 5.039426                | 0.083586  | 0.138465  |
| 46               | 6                | 0              | 3.044484                | -0.239826 | 0.136423  |
| 47               | 6                | 0              | 2.086829                | -2.219732 | -0.589458 |
| 48               | 6                | 0              | 2.377416                | -3.518497 | -0.971072 |
| 49               | 1                | 0              | 3.206158                | -3.724464 | -1.339316 |

|    |   |   |           |           |           |
|----|---|---|-----------|-----------|-----------|
| 50 | 6 | 0 | 1.430888  | -4.501415 | -0.801356 |
| 51 | 1 | 0 | 1.618315  | -5.376160 | -1.055675 |
| 52 | 6 | 0 | 0.205846  | -4.191027 | -0.255122 |
| 53 | 1 | 0 | -0.429855 | -4.859910 | -0.139119 |
| 54 | 6 | 0 | -0.088762 | -2.889111 | 0.123806  |
| 55 | 1 | 0 | -0.918113 | -2.694014 | 0.496541  |
| 56 | 6 | 0 | 0.847128  | -1.871812 | -0.049173 |
| 57 | 6 | 0 | -2.870268 | -0.505920 | -0.972944 |

**Table S21.** Coordinates of **BNS** after single-point energy calculations.

| Center<br>Number | Atomic<br>Number | Atomic<br>Type | Coordinates (Angstroms) |           |           |
|------------------|------------------|----------------|-------------------------|-----------|-----------|
|                  |                  |                | X                       | Y         | Z         |
| 1                | 16               | 0              | -3.210747               | -0.857667 | 1.156020  |
| 2                | 6                | 0              | -0.952581               | -1.794514 | -0.099507 |
| 3                | 6                | 0              | 2.734031                | -0.864579 | 1.175439  |
| 4                | 7                | 0              | -0.590139               | -0.406875 | -0.288959 |
| 5                | 6                | 0              | -0.163843               | -2.838183 | -0.572919 |
| 6                | 1                | 0              | 0.625737                | -2.653801 | -1.025871 |
| 7                | 6                | 0              | 0.754958                | 1.772705  | 0.281587  |
| 8                | 6                | 0              | -2.940277               | 0.313222  | -0.131392 |
| 9                | 6                | 0              | -1.514315               | 1.315689  | -1.751281 |
| 10               | 1                | 0              | -0.689603               | 1.360280  | -2.179082 |
| 11               | 6                | 0              | -1.690162               | 0.420673  | -0.697611 |
| 12               | 6                | 0              | 2.026249                | -0.669263 | -0.026876 |
| 13               | 6                | 0              | 3.835010                | -1.790279 | -1.194330 |
| 14               | 1                | 0              | 4.213027                | -2.088616 | -1.991458 |
| 15               | 6                | 0              | 0.996530                | 4.484879  | 0.970648  |
| 16               | 1                | 0              | 1.074236                | 5.381394  | 1.199426  |
| 17               | 6                | 0              | 2.598181                | -1.149640 | -1.211402 |
| 18               | 6                | 0              | 2.175572                | -0.403116 | 2.496804  |
| 19               | 1                | 0              | 2.132160                | 0.556519  | 2.508285  |
| 20               | 1                | 0              | 2.746587                | -0.704532 | 3.208053  |
| 21               | 1                | 0              | 1.294040                | -0.766115 | 2.616536  |
| 22               | 6                | 0              | 1.514009                | 2.662883  | -0.513882 |
| 23               | 5                | 0              | 0.694626                | 0.202192  | -0.031956 |
| 24               | 6                | 0              | 0.131301                | 2.295408  | 1.413130  |
| 25               | 6                | 0              | -2.535010               | 2.131812  | -2.169338 |
| 26               | 1                | 0              | -2.395555               | 2.747058  | -2.853327 |
| 27               | 6                | 0              | -1.736577               | -4.448607 | 0.244343  |
| 28               | 1                | 0              | -1.999655               | -5.334244 | 0.361776  |
| 29               | 6                | 0              | -3.983854               | 1.119514  | -0.574609 |
| 30               | 1                | 0              | -4.828440               | 1.035864  | -0.197361 |
| 31               | 6                | 0              | 1.611771                | 4.012193  | -0.149429 |
| 32               | 1                | 0              | 2.102499                | 4.594141  | -0.680247 |
| 33               | 6                | 0              | -2.138832               | -2.103203 | 0.538366  |
| 34               | 6                | 0              | 3.958451                | -1.522683 | 1.178864  |
| 35               | 1                | 0              | 4.415822                | -1.650947 | 1.978370  |
| 36               | 6                | 0              | 4.500621                | -1.985318 | -0.009661 |
| 37               | 1                | 0              | 5.318523                | -2.426607 | -0.007293 |
| 38               | 6                | 0              | 0.277021                | 3.654934  | 1.745992  |
| 39               | 1                | 0              | -0.131424               | 3.985131  | 2.514236  |

|    |   |   |           |           |           |
|----|---|---|-----------|-----------|-----------|
| 40 | 6 | 0 | 1.923155  | -1.044338 | -2.563456 |
| 41 | 1 | 0 | 1.054201  | -0.651913 | -2.456351 |
| 42 | 1 | 0 | 1.833181  | -1.920848 | -2.947008 |
| 43 | 1 | 0 | 2.454304  | -0.494886 | -3.143264 |
| 44 | 6 | 0 | -2.532989 | -3.432004 | 0.690510  |
| 45 | 1 | 0 | -3.346170 | -3.628636 | 1.098400  |
| 46 | 6 | 0 | -3.769156 | 2.031806  | -1.564919 |
| 47 | 1 | 0 | -4.462011 | 2.589258  | -1.835305 |
| 48 | 6 | 0 | -0.558981 | -4.163414 | -0.370855 |
| 49 | 1 | 0 | -0.011427 | -4.856635 | -0.659306 |
| 50 | 6 | 0 | -0.721535 | 1.473730  | 2.363407  |
| 51 | 1 | 0 | -1.647677 | 1.692176  | 2.231015  |
| 52 | 1 | 0 | -0.471951 | 1.671864  | 3.270946  |
| 53 | 1 | 0 | -0.584930 | 0.539959  | 2.189582  |
| 54 | 6 | 0 | 2.231431  | 2.221075  | -1.745366 |
| 55 | 1 | 0 | 2.842331  | 1.516048  | -1.524028 |
| 56 | 1 | 0 | 2.716239  | 2.959536  | -2.117464 |
| 57 | 1 | 0 | 1.594689  | 1.900090  | -2.386628 |

## 6. References

- [1] M. J. Frisch, G. W. Trucks, H. B. Schlegel, G. E. Scuseria, M. A. Robb, J. R. Cheeseman, G. Scalmani, V. Barone, G. A. Petersson, H. Nakatsuji, X. Li, M. Caricato, A. V. Marenich, J. Bloino, B. G. Janesko, R. Gomperts, B. Mennucci, H. P. Hratchian, J. V. Ortiz, A. F. Izmaylov, J. L. Sonnenberg, Williams, F. Ding, F. Lipparini, F. Egidi, J. Goings, B. Peng, A. Petrone, T. Henderson, D. Ranasinghe, V. G. Zakrzewski, J. Gao, N. Rega, G. Zheng, W. Liang, M. Hada, M. Ehara, K. Toyota, R. Fukuda, J. Hasegawa, M. Ishida, T. Nakajima, Y. Honda, O. Kitao, H. Nakai, T. Vreven, K. Throssell, J. A. Montgomery Jr., J. E. Peralta, F. Ogliaro, M. J. Bearpark, J. J. Heyd, E. N. Brothers, K. N. Kudin, V. N. Staroverov, T. A. Keith, R. Kobayashi, J. Normand, K. Raghavachari, A. P. Rendell, J. C. Burant, S. S. Iyengar, J. Tomasi, M. Cossi, J. M. Millam, M. Klene, C. Adamo, R. Cammi, J. W. Ochterski, R. L. Martin, K. Morokuma, O. Farkas, J. B. Foresman, D. J. Fox, Wallingford, CT, 2016.
- [2] T. A. K. Roy Dennington, and John M. Millam, Semichem Inc., Shawnee Mission, KS, 2016
- [3] (a) D. G. Chen, T. C. Lin, C. L. Chen, Y. T. Chen, Y. A. Chen, G. H. Lee, P. T. Chou, C. W. Liao, P. C. Chiu, C. H. Chang, Y. J. Lien and Y. Chi, *ACS Appl Mater Interfaces*, 2018, **10**, 12886–12896. (b) K. Neena, P. Sudhakar, K. Dipak and P. Thilagar, *Chemical Communications*, 2017, **53**, 3641–3644
- [4] (a) C. A. Swami and P. Thilagar, *Inorg Chem*, 2014, **53**, 2776–2786. (b) S. K. Sarkar, S. E. Rao and P. Thilagar, *J Phys Chem B*, 2020, **124**, 8896–8903. (c) P. Thilagar, R.P. Nandi, S. Ghosh, *Chem. Eur. J.* 2024, **30**, e202400398
- [5] (a) K. Goushi, K. Yoshida, K. Sato, C. Adachi, *Nat Photonics* 2012, **6**, 253–258 (b) K. Masui, H. Nakanotani, C. Adachi, *Org Electron* 2013, **14**, 2721–2726. (c) T. Nakagawa, S. Y. Ku, K. T. Wong, C. Adachi, *Chemical Communications* 2012, **48**, 9580–9582. (d) G. Méhes, H. Nomura, Q. Zhang, T. Nakagawa, C. Adachi, *Angewandte Chemie - International Edition* 2012, **51**, 11311–11315. (e) N. Notsuka, H. Nakanotani, H. Noda, K. Goushi, C. Adachi, *Journal of Physical Chemistry Letters* 2020, **11**, 562–566.
